# Supplementary material for: A new synthetic toll-like receptor 1/2 ligand is an efficient adjuvant for peptide vaccination in a human volunteer
Source: J Immunother Cancer. 2019 Nov 15;7:307. doi: 10.1186/s40425-019-0796-5 (PMC6858783; doi:10.1186/s40425-019-0796-5)
Supplement: Supplementary file 2 — Additional file 2. Transcriptome Granuloma Center (FPKM values). [file 40425_2019_796_MOESM2_ESM.xlsx]

## Sheet: FPKM Granuloma Center
ID	GENE	LOCUS	FPKM
ENSG00000211592	IGKC	chr2:89109983-89165653	30260
ENSG00000087086	FTL	chr19:49468557-49470135	14935
ENSG00000211896	IGHG1	chr14:106202679-106209408	13931.3
ENSG00000166710	B2M	chr15:45003674-45011075	13882.3
ENSG00000211651	IGLV1-44	chr22:22735134-22735715	11195.4
ENSG00000230043	TMSB4XP6	chr20:49411430-49493714	9128.88
ENSG00000019582	CD74	chr5:149781199-149792492	8998.96
ENSG00000167996	FTH1	chr11:61717292-61735132	8696.76
ENSG00000090382	LYZ	chr12:69742120-69748014	7406.84
ENSG00000211937	IGHV2-5	chr14:106494134-106494597	6206.24
ENSG00000211893	IGHG2	chr14:106109388-106115394	5494.41
ENSG00000242472	IGHJ5	chr14:106330023-106330072	5096.06
ENSG00000211679	IGLC3	chr22:23248511-23248973	4698.05
ENSG00000204287	HLA-DRA	chr6:32407618-32412823	4634.91
ENSG00000239951	IGKV3-20	chr2:89442056-89442643	4461.76
ENSG00000211959	IGHV4-39	chr14:106877618-106878126	4308.55
ENSG00000211675	IGLC1	chr22:23229959-23238287	3699.17
ENSG00000075624	ACTB	chr7:5566781-5603415	3696.28
ENSG00000234745	HLA-B	chr6:31321648-31325414	3496.19
ENSG00000113140	SPARC	chr5:151040656-151104343	3482.65
ENSG00000207834	D86994.2	chr22:23006897-23007377	3378.58
ENSG00000108821	COL1A1	chr17:48260649-48278993	3200.05
ENSG00000205542	TMSB4X	chrX:12993226-12995346	3189.63
ENSG00000034510	TMSB10	chr2:85048773-85134132	3148.53
ENSG00000211598	IGKV4-1	chr2:89184912-89185669	3127.16
ENSG00000133112	TPT1	chr13:45911007-45965872	2988.31
ENSG00000164692	COL1A2	chr7:94023872-94060544	2948.62
ENSG00000164733	CTSB	chr8:11700032-11726957	2763.65
ENSG00000211666	IGLV2-14	chr22:23101184-23101707	2717.46
ENSG00000168542	COL3A1	chr2:189839045-189877472	2616.74
ENSG00000211895	IGHA1	chr14:106173456-106175002	2593.92
ENSG00000196126	HLA-DRB1	chr6:32546545-32557625	2372.43
ENSG00000197746	PSAP	chr10:73576054-73611126	2296.78
ENSG00000211943	IGHV3-15	chr14:106610312-106610852	2280.55
ENSG00000130203	APOE	chr19:45409010-45412650	2278.3
ENSG00000226608	FTLP3	chr20:4004551-4005091	2230.29
ENSG00000211899	IGHM	chr14:106320348-106322323	2209.88
ENSG00000231389	HLA-DPA1	chr6:33032345-33054978	2186.55
ENSG00000243466	IGKV1-5	chr2:89246818-89247475	2182.67
ENSG00000026025	VIM	chr10:17256237-17279592	1943.95
ENSG00000206503	HLA-A	chr6:29909036-29913661	1876.9
ENSG00000179344	HLA-DQB1	chr6:32627243-32636160	1811.01
ENSG00000211892	IGHG4	chr14:106090686-106092403	1788.2
ENSG00000204525	HLA-C	chr6:31236525-31239907	1780.99
ENSG00000253998	IGKV2-29	chr2:89533654-89534393	1684.2
ENSG00000211662	IGLV3-21	chr22:23054173-23055688	1608.74
ENSG00000139329	LUM	chr12:91496405-91505608	1600.97
ENSG00000197756	RPL37A	chr2:217250010-217443903	1579.15
ENSG00000223865	HLA-DPB1	chr6:33032345-33054978	1548.3
ENSG00000142534	RPS11	chr19:49999621-50002946	1539.8
ENSG00000213741	RPS29	chr14:50043389-50081390	1523.95
ENSG00000187653	TMSB4XP8	chr4:91048685-92523064	1498.87
ENSG00000243238	IGKV2-30	chr2:89544263-89545079	1442.7
ENSG00000105372	RPS19	chr19:42363987-42376994	1375.92
ENSG00000231486	AC096579.7	chr2:89109983-89165653	1329.71
ENSG00000167526	RPL13	chr16:89627064-89630950	1326.71
ENSG00000211677	IGLC2	chr22:23243155-23243617	1311.23
ENSG00000241351	IGKV3-11	chr2:89326667-89327228	1297.12
ENSG00000211897	IGHG3	chr14:106235438-106237742	1281.43
ENSG00000137818	RPLP1	chr15:69745122-69748255	1269.63
ENSG00000117984	CTSD	chr11:1753639-1785255	1263.57
ENSG00000108298	RPL19	chr17:37356535-37360980	1255.65
ENSG00000173369	C1QB	chr1:22979254-22988031	1243.34
ENSG00000111640	GAPDH	chr12:6643092-6647537	1242.32
ENSG00000184009	ACTG1	chr17:79476996-79494802	1235.12
ENSG00000174444	RPL4	chr15:66790354-66858317	1223.2
ENSG00000071082	RPL31	chr2:101436613-101886778	1166.83
ENSG00000196735	HLA-DQA1	chr6:32595955-32614839	1157.1
ENSG00000145592	RPL37	chr5:40825363-40835437	1155.58
ENSG00000130066	SAT1	chrX:23801289-23804343	1140.44
ENSG00000163191	S100A11	chr1:151967006-152020383	1136.88
ENSG00000227097	RP11-742N3.1	chr11:81590892-82429124	1134.22
ENSG00000135404	CD63	chr12:56119106-56124467	1125.53
ENSG00000216490	IFI30	chr19:18263927-18288927	1114.23
ENSG00000138326	RPS24	chr10:79793517-79816570	1105.47
ENSG00000011465	DCN	chr12:91539024-91576900	1102.94
ENSG00000101439	CST3	chr20:23608533-23619110	1102.1
ENSG00000173372	C1QA	chr1:22962998-22966101	1090.18
ENSG00000149273	RPS3	chr11:75110529-75133324	1054.59
ENSG00000087245	MMP2	chr16:55423611-55540603	1028.9
ENSG00000140988	RPS2	chr16:2012052-2014861	1023.5
ENSG00000142676	RPL11	chr1:24018268-24022915	1020.62
ENSG00000236552	RPL13AP5	chr10:98510044-98510675	1008.56
ENSG00000156482	RPL30	chr8:98881067-99058697	999.271
ENSG00000008988	RPS20	chr8:56979853-56987069	998.12
ENSG00000156508	EEF1A1	chr6:74225472-74280319	991.906
ENSG00000105193	RPS16	chr19:39923846-39926588	986.166
ENSG00000177600	RPLP2	chr11:799178-812880	972.298
ENSG00000231500	RPS18	chr6:33217310-33244287	968.35
ENSG00000211648	IGLV1-47	chr22:22712086-22712608	962.272
ENSG00000235174	RPL39P3	chr6:74078277-74161999	949.065
ENSG00000100097	LGALS1	chr22:38071614-38075813	942.301
ENSG00000240671	IGKV1-8	chr2:89291927-89292450	938.195
ENSG00000162511	LAPTM5	chr1:31205315-31230667	932.024
ENSG00000211673	IGLV3-1	chr22:23222885-23223576	922.593
ENSG00000108107	RPL28	chr19:55896712-55919145	915.382
ENSG00000125691	RPL23	chr17:37004117-37010096	913.997
ENSG00000108518	PFN1	chr17:4848946-4860426	910.794
ENSG00000011600	TYROBP	chr19:36395302-36399197	893.06
ENSG00000211938	IGHV3-7	chr14:106518399-106518932	877.036
ENSG00000213442	RPL18AP3	chr12:104609556-104744061	874.701
ENSG00000144713	RPL32	chr3:12837970-12913415	870.003
ENSG00000186468	RPS23	chr5:81267843-81574396	869.845
ENSG00000232573	RPL3P4	chr14:99439215-99439638	867.134
ENSG00000063177	RPL18	chr19:49118584-49140695	865.038
ENSG00000131469	RPL27	chr17:41150289-41154976	863.801
ENSG00000237973	hsa-mir-6723	chr1:536815-660283	863.027
ENSG00000142156	COL6A1	chr21:47401650-47424964	862.261
ENSG00000211966	IGHV5-51	chr14:107034728-107035221	860.172
ENSG00000161016	RPL8	chr8:146015149-146017972	859.248
ENSG00000240041	IGHJ4	chr14:106330424-106330470	855.329
ENSG00000211952	IGHV4-28	chr14:106780512-106781017	852.053
ENSG00000204628	GNB2L1	chr5:180663908-180699308	835.196
ENSG00000211949	IGHV3-23	chr14:106725200-106725733	831.783
ENSG00000101160	CTSZ	chr20:57570239-57582302	831.175
ENSG00000170889	RPS9	chr19:54704609-54752862	826.206
ENSG00000234975	FTH1P2	chr1:228823161-228823574	822.913
ENSG00000134419	RPS15A	chr16:18792616-18813000	820.997
ENSG00000142937	RPS8	chr1:45205489-45244451	820.478
ENSG00000100316	RPL3	chr22:39708886-39716394	819.451
ENSG00000244398	RP11-466H18.1	chr11:16799841-17074583	818.825
ENSG00000161970	RPL26	chr17:8268880-8286531	815.381
ENSG00000158869	FCER1G	chr1:161185023-161193421	808.047
ENSG00000092841	MYL6	chr12:56544579-56584068	804.677
ENSG00000137154	RPS6	chr9:19375448-19380252	803.967
ENSG00000204592	HLA-E	chr6:30457243-30461982	793.698
ENSG00000172757	CFL1	chr11:65590492-65641063	780.794
ENSG00000149925	ALDOA	chr16:30064410-30081778	779.726
ENSG00000221983	UBA52	chr19:18682539-18731849	776.462
ENSG00000104904	OAZ1	chr19:2252250-2273487	776.108
ENSG00000159189	C1QC	chr1:22970122-22974603	774.031
ENSG00000147403	RPL10	chrX:153618314-153650065	761.901
ENSG00000136942	RPL35	chr9:127615754-127624260	757.497
ENSG00000140264	SERF2	chr15:44019115-44095241	751.224
ENSG00000218426	RP11-475C16.1	chr6:153552454-153668623	744.238
ENSG00000196205	EEF1A1P5	chr9:135894815-135896553	737.909
ENSG00000102265	TIMP1	chrX:47420515-47479252	734.607
ENSG00000112096	SOD2	chr6:160090088-160210781	726.481
ENSG00000197956	S100A6	chr1:153506078-153508720	720.472
ENSG00000163131	CTSS	chr1:150702671-150738433	719.03
ENSG00000142173	COL6A2	chr21:47518010-47552763	710.826
ENSG00000130208	APOC1	chr19:45417503-45422606	708.855
ENSG00000109475	RPL34	chr4:109541721-109551568	705.536
ENSG00000164587	RPS14	chr5:149822752-149829319	693.061
ENSG00000234851	RP11-3P17.3	chr3:161144214-161166030	687.158
ENSG00000166441	RPL27A	chr11:8703957-8932498	684.609
ENSG00000182899	RPL35A	chr3:197615945-197687013	684.494
ENSG00000211965	IGHV3-49	chr14:107012937-107013477	683.432
ENSG00000112306	RPS12	chr6:133135579-133138703	677.611
ENSG00000132465	IGJ	chr4:71494460-71552533	672.306
ENSG00000211941	IGHV3-11	chr14:106573232-106573800	653.386
ENSG00000211663	IGLV3-19	chr22:23063107-23063630	638.773
ENSG00000170296	GABARAP	chr17:7143332-7167302	638.37
ENSG00000136235	GPNMB	chr7:23275585-23314727	630.191
ENSG00000110700	RPS13	chr11:17095935-17229530	629.071
ENSG00000089157	RPLP0	chr12:120634488-120639038	623.752
ENSG00000051523	CYBA	chr16:88709690-88717560	614.441
ENSG00000125730	C3	chr19:6677714-6737614	613.909
ENSG00000030582	GRN	chr17:42422613-42430470	610.954
ENSG00000234287	RP11-761N21.2	chr3:40803035-40803290	607.679
ENSG00000211973	IGHV1-69	chr14:107169930-107170428	606.734
ENSG00000244437	IGKV3-15	chr2:89384672-89385283	603.956
ENSG00000187514	PTMA	chr2:232571516-232578251	598.703
ENSG00000240864	IGKV1-16	chr2:89399351-89399854	598.676
ENSG00000251705	RNA5-8SP6	chrY:10037763-10037915	597.382
ENSG00000167658	EEF2	chr19:3976053-3985467	584.234
ENSG00000173812	EIF1	chr17:39775688-39943183	583.933
ENSG00000233276	GPX1	chr3:49394608-49396033	580.605
ENSG00000172809	RPL38	chr17:72199720-72209481	570.928
ENSG00000223361	FTH1P10	chr5:17353803-17355008	570.465
ENSG00000133048	CHI3L1	chr1:203148058-203155877	568.103
ENSG00000110651	CD81	chr11:2349978-2418649	567.078
ENSG00000117289	TXNIP	chr1:145438468-145442635	567.002
ENSG00000198755	RPL10A	chr6:35436184-35438562	566.075
ENSG00000070756	PABPC1	chr8:101698043-101735037	555.607
ENSG00000215030	RPL13P12	chr17:17286690-17287326	552.274
ENSG00000219507	FTH1P8	chrX:147133752-147134266	551.111
ENSG00000133063	CHIT1	chr1:203181954-203242769	534.943
ENSG00000244313	RP11-425L10.1	chr11:46417963-46615675	526.122
ENSG00000142089	IFITM3	chr11:318639-330122	524.25
ENSG00000159403	C1R	chr12:7187512-7275097	524.231
ENSG00000130255	RPL36	chr19:5674957-5720583	522.53
ENSG00000122406	RPL5	chr1:93297581-93307481	518.064
ENSG00000042493	CAPG	chr2:85621870-85645555	514.819
ENSG00000142541	RPL13A	chr19:49949554-49995565	507.452
ENSG00000136156	ITM2B	chr13:48807293-48837063	504.48
ENSG00000129226	CD68	chr17:7465191-7536700	501.331
ENSG00000132386	SERPINF1	chr17:1665252-1680868	501.022
ENSG00000122862	SRGN	chr10:70847861-70864567	495.667
ENSG00000025708	TYMP	chr22:50961996-50971009	491.021
ENSG00000239776	AC079949.1	chr12:127650615-127650672	483.015
ENSG00000196154	S100A4	chr1:153516088-153522612	481.467
ENSG00000198034	RPS4X	chrX:71401202-71527037	478.978
ENSG00000160255	ITGB2	chr21:46305867-46351904	478.623
ENSG00000230629	RPS23P8	chrX:70182813-70183143	471.272
ENSG00000148303	RPL7A	chr9:136215068-136218281	469.429
ENSG00000254709	IGLL5	chr22:23229959-23238287	461.575
ENSG00000165140	FBP1	chr9:97365414-97402531	460.975
ENSG00000115268	RPS15	chr19:1438357-1440583	460.905
ENSG00000119655	NPC2	chr14:74942894-74963809	460.081
ENSG00000149131	SERPING1	chr11:57364859-57382326	453.42
ENSG00000227081	RP11-543P15.1	chr12:3186520-3395730	452.897
ENSG00000224631	RP11-51O6.1	chr16:61089302-61089868	452.552
ENSG00000129538	RNASE1	chr14:21269386-21271437	452.279
ENSG00000197958	RPL12	chr9:130209952-130213684	447.251
ENSG00000196531	NACA	chr12:57106211-57181574	445.743
ENSG00000211653	IGLV1-40	chr22:22764097-22764614	445.527
ENSG00000117450	PRDX1	chr1:45959537-45988719	444.965
ENSG00000182492	BGN	chrX:152710177-152775012	443.283
ENSG00000130429	ARPC1B	chr7:98923520-99063954	439.597
ENSG00000105223	PLD3	chr19:40825442-40896094	439.413
ENSG00000125148	MT2A	chr16:56642110-56643409	436.278
ENSG00000131143	COX4I1	chr16:85805363-85840650	435.448
ENSG00000067225	PKM	chr15:72491369-72524164	431.235
ENSG00000067560	RHOA	chr3:49396577-49453908	430.533
ENSG00000074800	ENO1	chr1:8921060-8939953	429.428
ENSG00000185215	TNFAIP2	chr14:103589778-103603776	428.716
ENSG00000234797	RPS3AP6	chr15:60060542-60061347	427.096
ENSG00000182326	C1S	chr12:7072407-7178336	426.636
ENSG00000174748	RPL15	chr3:23933150-24022109	425.591
ENSG00000100985	MMP9	chr20:44637546-44688784	424.995
ENSG00000149806	FAU	chr11:64888099-64902004	421.985
ENSG00000180879	SSR4	chrX:153051220-153063960	420.76
ENSG00000083845	RPS5	chr19:58897766-58906173	420.47
ENSG00000204257	HLA-DMA	chr6:32902405-32949282	417.497
ENSG00000135821	GLUL	chr1:182350838-182361341	415.743
ENSG00000182718	ANXA2	chr15:60639332-60695082	413.876
ENSG00000109971	HSPA8	chr11:122928196-122933938	413.84
ENSG00000254395	IGHV4-55	chr14:107062110-107062561	413.276
ENSG00000087460	GNAS	chr20:57393973-57486247	412.281
ENSG00000240342	RPS2P5	chr12:118587605-118810750	411.688
ENSG00000166794	PPIB	chr15:64443913-64455404	410.243
ENSG00000143387	CTSK	chr1:150768683-150780799	409.226
ENSG00000162244	RPL29	chr3:52027615-52029958	409.058
ENSG00000114391	RPL24	chr3:101399934-101405626	401.135
ENSG00000145423	SFRP2	chr4:154701743-154710272	400.626
ENSG00000142669	SH3BGRL3	chr1:26605666-26647014	399.179
ENSG00000132475	H3F3B	chr17:73772514-73821886	396.595
ENSG00000211940	IGHV3-9	chr14:106552284-106552809	396.548
ENSG00000170315	UBB	chr17:16284111-16286059	390.73
ENSG00000242371	IGKV1-39	chr2:89619382-89619904	389.488
ENSG00000170458	CD14	chr5:140011312-140013286	383.927
ENSG00000171858	RPS21	chr20:60962171-60963576	383.192
ENSG00000198618	PPIAP22	chr21:20230096-20230594	382.153
ENSG00000109861	CTSC	chr11:88026759-88070955	380.455
ENSG00000213553	RPLP0P6	chr2:38633860-38742882	379.822
ENSG00000111348	ARHGDIB	chr12:15094950-15114662	377.683
ENSG00000197747	S100A10	chr1:151955390-151966866	376.028
ENSG00000196924	FLNA	chrX:153576891-153603006	373.956
ENSG00000203747	FCGR3A	chr1:161475219-161648444	372.945
ENSG00000163466	ARPC2	chr2:219081816-219119079	370.961
ENSG00000118181	RPS25	chr11:118868851-118901616	367.762
ENSG00000245532	NEAT1	chr11:65190244-65213011	364.439
ENSG00000219200	RNASEK	chr17:6757179-6922978	363.575
ENSG00000123416	TUBA1B	chr12:49521564-49541652	360.172
ENSG00000123349	PFDN5	chr12:53689074-53700961	358.416
ENSG00000103811	CTSH	chr15:79213399-79241916	353.909
ENSG00000169442	CD52	chr1:26605666-26647014	352.864
ENSG00000242574	HLA-DMB	chr6:32902405-32949282	352.541
ENSG00000236439	RP11-175B9.3	chr1:202317826-202679545	352.083
ENSG00000143947	RPS27A	chr2:55401926-55462989	347.837
ENSG00000100219	XBP1	chr22:29190542-29196585	347.431
ENSG00000211956	IGHV4-34	chr14:106829593-106830076	346.627
ENSG00000225523	IGKV6D-21	chr2:90060376-90060995	346.28
ENSG00000130600	H19	chr11:2016405-2022700	345.902
ENSG00000185624	P4HB	chr17:79801034-79818570	344.572
ENSG00000106538	RARRES2	chr7:150035407-150038763	343.706
ENSG00000133110	POSTN	chr13:38136719-38172981	343.036
ENSG00000107562	CXCL12	chr10:44793037-44881941	336.82
ENSG00000102575	ACP5	chr19:11670188-11729950	335.754
ENSG00000250722	SEPP1	chr5:42756902-42887494	333.804
ENSG00000108654	DDX5	chr17:62495733-62658186	332.438
ENSG00000188846	RPL14	chr3:40498782-40503861	331.016
ENSG00000137970	RPL7P9	chr1:97144429-97145176	330.337
ENSG00000211945	IGHV1-18	chr14:106641562-106642056	329.265
ENSG00000035862	TIMP2	chr17:76849058-76921469	327.154
ENSG00000158710	TAGLN2	chr1:159887896-159895522	326.001
ENSG00000211659	IGLV3-25	chr22:23029189-23029735	325.952
ENSG00000101608	MYL12A	chr18:3247478-3261848	325.515
ENSG00000107798	LIPA	chr10:90973325-91174314	322.355
ENSG00000178464	CTD-2192J16.15	chr19:12754088-12792716	322.338
ENSG00000139644	TMBIM6	chr12:49962000-50158717	321.405
ENSG00000167468	GPX4	chr19:1103935-1106787	321.26
ENSG00000179218	CALR	chr19:13049391-13055303	319.052
ENSG00000131981	LGALS3	chr14:55590827-55612126	318.875
ENSG00000134333	LDHA	chr11:18415934-18429972	317.517
ENSG00000185201	IFITM2	chr11:307630-315272	315.078
ENSG00000114353	GNAI2	chr3:50263723-50296787	315.032
ENSG00000185641	CTD-2287O16.1	chr5:115298150-115395815	314.347
ENSG00000227615	RP11-864N7.2	chr11:74456760-74457159	314.332
ENSG00000104529	EEF1D	chr8:144661805-144682485	314.23
ENSG00000185883	ATP6V0C	chr16:2525146-2581423	310.001
ENSG00000254772	EEF1G	chr11:62327072-62359649	309.398
ENSG00000140105	WARS	chr14:100800124-100996640	308.327
ENSG00000212802	RPL15P3	chr6:12514341-12515006	308.203
ENSG00000143933	CALM2	chr2:47126413-47403740	307.331
ENSG00000106624	AEBP1	chr7:44143959-44154161	304.157
ENSG00000110955	ATP5B	chr12:57031958-57039798	302.97
ENSG00000143119	CD53	chr1:111415774-111442550	302.787
ENSG00000242299	RP11-234A1.1	chr3:101292938-101313281	300.921
ENSG00000183405	RPS7P1	chr17:26782769-26972472	299.475
ENSG00000166598	HSP90B1	chr12:104235228-104359486	299.178
ENSG00000157227	MMP14	chr14:23305765-23318236	296.445
ENSG00000136167	LCP1	chr13:46700054-46786006	295.67
ENSG00000110077	MS4A6A	chr11:59939080-59952139	295.124
ENSG00000243678	NME1-NME2	chr17:49230896-49249108	294.17
ENSG00000167978	SRRM2	chr16:2787076-2827298	292.666
ENSG00000204642	HLA-F	chr6:29690551-29716826	291.579
ENSG00000211950	IGHV1-24	chr14:106733143-106733639	290.757
ENSG00000127184	COX7C	chr5:85913720-85916779	290.39
ENSG00000065978	YBX1	chr1:43148097-43168020	290.087
ENSG00000135390	ATP5G2	chr12:54026509-54071192	290.001
ENSG00000211935	IGHV1-3	chr14:106471245-106471723	289.974
ENSG00000169045	HNRNPH1	chr5:179041178-179061785	288.94
ENSG00000181163	NPM1	chr5:170814119-170838141	288.352
ENSG00000006074	CCL18	chr17:34391639-34399392	286.002
ENSG00000106333	PCOLCE	chr7:100169854-100205798	285.262
ENSG00000163220	S100A9	chr1:153330329-153333503	283.777
ENSG00000167460	TPM4	chr19:16177830-16213813	282.484
ENSG00000141753	IGFBP4	chr17:38599701-38613983	282.456
ENSG00000165949	IFI27	chr14:94571181-94583033	280.853
ENSG00000211955	IGHV3-33	chr14:106815721-106816253	280.384
ENSG00000196262	PPIA	chr7:44836278-44864163	279.199
ENSG00000237264	FTH1P11	chr8:82351670-82445510	278.933
ENSG00000242071	RPL7AP6	chr14:70320847-70499083	278.75
ENSG00000211772	TRBC2	chr7:142498724-142500432	276.27
ENSG00000118785	SPP1	chr4:88896818-88904562	274.167
ENSG00000228474	OST4	chr2:27265231-27294641	273.441
ENSG00000189067	LITAF	chr16:11641852-11730237	272.887
ENSG00000164111	ANXA5	chr4:122589109-122618268	272.12
ENSG00000196611	MMP1	chr11:102617698-102714534	271.408
ENSG00000084207	GSTP1	chr11:67351065-67354131	270.429
ENSG00000102144	PGK1	chrX:77320684-77384793	270.238
ENSG00000093072	CECR1	chr22:17660193-17702879	270.212
ENSG00000103187	COTL1	chr16:84599199-84651683	269.036
ENSG00000213178	RP11-641D5.1	chr3:168801286-169381406	268.883
ENSG00000161960	EIF4A1	chr17:7465191-7536700	268.12
ENSG00000197111	PCBP2	chr12:53835388-53893847	265.801
ENSG00000026508	CD44	chr11:35160416-35253949	265.698
ENSG00000226221	AC022431.1	chr5:55800461-55800899	264.158
ENSG00000111669	TPI1	chr12:6976282-7032861	263.973
ENSG00000176340	COX8A	chr11:63742078-63933578	263.209
ENSG00000145741	BTF3	chr5:72794232-72801460	262.973
ENSG00000183283	DAZAP2	chr12:51632075-51665146	261.446
ENSG00000150991	UBC	chr12:125396149-125401914	258.194
ENSG00000166033	HTRA1	chr10:124221040-124274424	257.633
ENSG00000232187	FTH1P7	chr13:23270161-23270713	256.905
ENSG00000211669	IGLV3-10	chr22:23154243-23154782	256.537
ENSG00000148180	GSN	chr9:123940414-124095121	254.142
ENSG00000196230	TUBB	chr6:30687977-30693203	252.669
ENSG00000139239	RPL14P1	chr12:63359094-63359764	251.433
ENSG00000244116	IGKV2-28	chr2:89521178-89521942	251.366
ENSG00000164713	BRI3	chr7:97881690-98030380	250.73
ENSG00000163453	IGFBP7	chr4:57829535-58071676	246.956
ENSG00000137575	SDCBP	chr8:59465482-59495419	246.636
ENSG00000163359	COL6A3	chr2:238232645-238323018	246.153
ENSG00000143761	ARF1	chr1:228270360-228286912	246.042
ENSG00000124614	RPS10	chr6:34247455-34393902	245.897
ENSG00000171863	RPS7	chr2:3622794-3628509	245.028
ENSG00000111229	ARPC3	chr12:110810704-110888227	244.977
ENSG00000178719	GRINA	chr8:145051320-145101933	244.674
ENSG00000122566	HNRNPA2B1	chr7:26229546-26252976	242.249
ENSG00000197249	SERPINA1	chr14:94843083-94857030	242.244
ENSG00000243290	IGKV1-12	chr2:89339720-89340242	241.288
ENSG00000155368	DBI	chr2:120124496-120130126	239.989
ENSG00000135047	CTSL	chr9:90340433-90346308	238.927
ENSG00000147065	MSN	chrX:64808256-64961791	238.141
ENSG00000240972	MIF	chr22:24198613-24241117	237.808
ENSG00000099622	CIRBP	chr19:1259383-1274879	236.006
ENSG00000211660	IGLV2-23	chr22:23040273-23040892	234.563
ENSG00000172216	CEBPB	chr20:48807375-48809212	234.11
ENSG00000171223	JUNB	chr19:12873816-12985765	230.83
ENSG00000142227	EMP3	chr19:48799713-48833810	230.196
ENSG00000100129	EIF3L	chr22:38226861-38285414	229.787
ENSG00000077549	CAPZB	chr1:19665266-19812066	228.754
ENSG00000106565	TMEM176B	chr7:150488372-150502208	228.121
ENSG00000075415	SLC25A3	chr12:98987368-98995946	227.619
ENSG00000240382	IGKV1-17	chr2:89416832-89417335	227.119
ENSG00000113732	ATP6V0E1	chr5:172410759-172462448	226.633
ENSG00000138755	CXCL9	chr4:76831808-76928641	226.296
ENSG00000239264	TXNDC5	chr6:7727029-8102811	225.556
ENSG00000108679	LGALS3BP	chr17:76967319-76976191	225.331
ENSG00000131446	MGAT1	chr5:180217540-180242652	225.195
ENSG00000231991	ANXA2P2	chr9:33624222-33625532	225.067
ENSG00000105373	GLTSCR2	chr19:48248778-48272097	224.22
ENSG00000077942	FBLN1	chr22:45898117-45997015	223.921
ENSG00000198502	HLA-DRB5	chr6:32485119-32498064	223.861
ENSG00000110719	TCIRG1	chr11:67806482-67888911	223.73
ENSG00000198242	RPL23A	chr17:27046410-27070473	223.604
ENSG00000104763	ASAH1	chr8:17913933-17953903	223.412
ENSG00000161570	CCL5	chr17:34195970-34212867	223.242
ENSG00000128524	ATP6V1F	chr7:128470430-128550773	222.834
ENSG00000213719	CLIC1	chr6:31694814-31707540	222.533
ENSG00000165168	CYBB	chrX:37208527-38548169	221.068
ENSG00000203875	SNHG5	chr6:86370709-86388451	220.97
ENSG00000233927	RPS28	chr19:8367010-8408146	220.848
ENSG00000104870	FCGRT	chr19:50010072-50029590	220.723
ENSG00000165502	RPL36AL	chr14:50085236-50087403	219.066
ENSG00000100300	TSPO	chr22:43547519-43559248	217.976
ENSG00000102317	RBM3	chrX:48431481-48437454	216.783
ENSG00000143549	TPM3	chr1:154127783-154167124	216.236
ENSG00000066336	SPI1	chr11:47376410-47400127	215.308
ENSG00000204472	AIF1	chr6:31582960-31584798	215.091
ENSG00000242766	IGKV1D-17	chr2:90121476-90122133	214.924
ENSG00000175061	FAM211A-AS1	chr17:16342135-16395467	213.992
ENSG00000125534	PPDPF	chr20:62152076-62153559	213.378
ENSG00000126264	HCST	chr19:36393381-36395279	213.029
ENSG00000241468	ATP5J2	chr7:98923520-99063954	212.725
ENSG00000089009	RPL6	chr12:112842993-112947717	212.525
ENSG00000227008	RP3-417G15.1	chrX:132669772-133119922	212.031
ENSG00000115415	STAT1	chr2:191745522-191885686	211.492
ENSG00000141522	ARHGDIA	chr17:79825596-79829282	209.99
ENSG00000110321	EIF4G2	chr11:10804859-10830657	209.796
ENSG00000106211	HSPB1	chr7:75931860-75933612	208.92
ENSG00000068697	LAPTM4A	chr2:20232410-20251789	208.572
ENSG00000143546	S100A8	chr1:153362507-153363664	207.931
ENSG00000169564	PCBP1	chr2:70187225-70316332	207.884
ENSG00000164932	CTHRC1	chr8:104383742-104395225	207.71
ENSG00000167004	PDIA3	chr15:44019115-44095241	206.067
ENSG00000118640	VAMP8	chr2:85788684-85809154	205.858
ENSG00000211953	IGHV3-30	chr14:106791004-106791536	205.839
ENSG00000126247	CAPNS1	chr19:36630476-36641255	205.42
ENSG00000118680	MYL12B	chr18:3261906-3278282	205.117
ENSG00000211947	IGHV3-21	chr14:106691672-106692203	203.918
ENSG00000100201	DDX17	chr22:38864066-38903665	203.781
ENSG00000130635	COL5A1	chr9:137533619-137736686	203.559
ENSG00000213145	CRIP1	chr14:105952653-105965912	203.196
ENSG00000120708	TGFBI	chr5:135364583-135399507	203.116
ENSG00000162704	ARPC5	chr1:183592400-183604892	203.007
ENSG00000100979	PLTP	chr20:44517263-44540794	202.985
ENSG00000088832	FKBP1A	chr20:1290618-1373806	202.821
ENSG00000010327	STAB1	chr3:52529353-52742182	201.652
ENSG00000131236	CAP1	chr1:40505904-40538321	201.459
ENSG00000211640	IGLV6-57	chr22:22550112-22550860	200.174
ENSG00000161011	SQSTM1	chr5:179224596-179334859	200.173
ENSG00000169714	CNBP	chr3:128888326-128902765	200.141
ENSG00000114942	EEF1B2	chr2:206979540-207027652	199.846
ENSG00000168028	RPSA	chr3:39448179-39454033	199.548
ENSG00000049860	HEXB	chr5:73923233-74072737	199.372
ENSG00000166741	NNMT	chr11:113930314-114227293	198.702
ENSG00000211644	IGLV1-51	chr22:22657588-22677336	198.464
ENSG00000185885	IFITM1	chr11:307630-315272	198.408
ENSG00000133872	TMEM66	chr8:29920527-29940983	198.348
ENSG00000005022	SLC25A5	chrX:118599996-118605282	197.703
ENSG00000164924	YWHAZ	chr8:101928752-101965616	197.509
ENSG00000100650	SRSF5	chr14:70193616-70238722	197.469
ENSG00000160213	CSTB	chr21:45192392-45196326	197.168
ENSG00000115524	SF3B1	chr2:198254507-198299815	196.863
ENSG00000184897	H1FX	chr3:129033614-129045068	196.63
ENSG00000211650	IGLV5-45	chr22:22730354-22730874	195.94
ENSG00000244575	IGKV1-27	chr2:89512907-89513413	195.3
ENSG00000019169	MARCO	chr2:119699741-119752236	195.055
ENSG00000152234	ATP5A1	chr18:43664109-43708299	194.619
ENSG00000143162	CREG1	chr1:167498913-167523004	193.581
ENSG00000234664	HMGN2P5	chr15:29991570-30261068	193.505
ENSG00000064205	WISP2	chr20:43285091-43379675	192.944
ENSG00000163479	SSR2	chr1:155978838-155990750	192.166
ENSG00000128272	ATF4	chr22:39915699-39918691	191.637
ENSG00000211964	IGHV3-48	chr14:106993813-106994346	190.553
ENSG00000211936	IGHV4-4	chr14:106478109-106478603	190.477
ENSG00000196405	EVL	chr14:100437785-100610573	189.82
ENSG00000175899	A2M	chr12:9217772-9268825	189.593
ENSG00000102879	CORO1A	chr16:30194147-30200397	189.531
ENSG00000196743	GM2A	chr5:150560612-150650001	189.134
ENSG00000159840	ZYX	chr7:143078172-143220542	189.017
ENSG00000204196	AC011737.2	chr2:203879601-204091101	188.936
ENSG00000104964	AES	chr19:3052907-3063105	188.828
ENSG00000172270	BSG	chr19:567211-583493	188.653
ENSG00000130592	LSP1	chr11:1874199-1913497	188.491
ENSG00000107223	EDF1	chr9:139756570-139760738	186.905
ENSG00000168961	LGALS9	chr17:25783669-25976586	185.592
ENSG00000143384	MCL1	chr1:150547031-150552066	185.474
ENSG00000163430	FSTL1	chr3:120111139-120170100	185.434
ENSG00000241553	ARPC4	chr3:9791627-9896822	185.373
ENSG00000072778	ACADVL	chr17:7093208-7128592	184.957
ENSG00000117410	ATP6V0B	chr1:44440158-44443967	184.702
ENSG00000100600	LGMN	chr14:93170151-93215047	183.926
ENSG00000182220	ATP6AP2	chrX:40440145-40465889	182.271
ENSG00000126267	COX6B1	chr19:36139124-36149763	181.917
ENSG00000132507	EIF5A	chr17:7210317-7232712	181.795
ENSG00000131238	PPT1	chr1:40538378-40563375	181.407
ENSG00000211668	IGLV2-11	chr22:23134976-23135496	181.39
ENSG00000107317	PTGDS	chr9:139871955-139880862	181.334
ENSG00000175567	UCP2	chr11:73685711-73694352	181.115
ENSG00000155130	MARCKS	chr6:114178540-114184648	180.717
ENSG00000143774	GUK1	chr1:228327662-228336685	180.461
ENSG00000159377	PSMB4	chr1:151372009-151374420	177.854
ENSG00000235552	RPL6P27	chr18:6462142-6463014	177.759
ENSG00000205246	RPSAP58	chr19:23945745-24057503	177.47
ENSG00000110446	SLC15A3	chr11:60680637-60720002	177.435
ENSG00000211942	IGHV3-13	chr14:106586136-106586667	176.628
ENSG00000233762	AC007969.5	chr2:172373748-172374232	176.364
ENSG00000170476	MZB1	chr5:138723168-138725770	176.183
ENSG00000085063	CD59	chr11:33719806-33757991	175.548
ENSG00000123144	C19orf43	chr19:12841453-12845589	175.454
ENSG00000166920	C15orf48	chr15:45722726-45878488	175.299
ENSG00000146677	AC004453.8	chr7:44418719-44530479	174.673
ENSG00000165119	HNRNPK	chr9:86582997-86595569	174.525
ENSG00000218175	AC016739.2	chr2:177065635-177065980	174.418
ENSG00000130522	JUND	chr19:18390562-18392432	174.357
ENSG00000185650	ZFP36L1	chr14:69254376-69263190	174.33
ENSG00000135506	OS9	chr12:58087737-58115340	174.238
ENSG00000131171	SH3BGRL	chrX:80457441-80554046	173.715
ENSG00000162576	MXRA8	chr1:1288068-1297157	173.504
ENSG00000121966	CXCR4	chr2:136871918-136875735	172.991
ENSG00000169020	ATP5I	chr4:666224-683230	172.72
ENSG00000198668	CALM1	chr14:90862845-90874605	172.459
ENSG00000129824	RPS4Y1	chrY:2709526-2800041	171.6
ENSG00000115310	RTN4	chr2:55199324-55339757	171.321
ENSG00000096384	HSP90AB1	chr6:44214823-44221620	171.134
ENSG00000197448	GSTK1	chr7:142941185-142985141	170.783
ENSG00000152518	ZFP36L2	chr2:43393799-43823185	170.708
ENSG00000182087	TMEM259	chr19:999600-1021117	170.11
ENSG00000161921	CXCL16	chr17:4634722-4643217	169.61
ENSG00000106803	SEC61B	chr9:101984345-101992897	168.717
ENSG00000187109	NAP1L1	chr12:76438669-76478813	168.699
ENSG00000136810	TXN	chr9:113006090-113018920	168.416
ENSG00000185896	LAMP1	chr13:113951555-113977987	168.226
ENSG00000100906	NFKBIA	chr14:35870716-35873955	167.59
ENSG00000135046	ANXA1	chr9:75766672-75785309	167.224
ENSG00000088986	DYNLL1	chr12:120907652-120936296	167.105
ENSG00000164919	COX6C	chr8:100025493-100906290	166.747
ENSG00000162734	PEA15	chr1:160171988-160185166	166.659
ENSG00000211671	IGLV2-8	chr22:23165152-23165787	165.935
ENSG00000230202	RP11-632C17__A.1	chr6:118228688-118638839	165.81
ENSG00000198258	UBL5	chr19:9938567-9940791	164.921
ENSG00000089327	FXYD5	chr19:35645632-35660786	164.681
ENSG00000158747	NBL1	chr1:19923472-19984945	164.484
ENSG00000166340	TPP1	chr11:6633999-6640995	164.116
ENSG00000181524	RPL24P4	chr6:42924082-42924503	164.019
ENSG00000159335	PTMS	chr12:6857169-6880116	163.662
ENSG00000117448	AKR1A1	chr1:46016214-46035721	163.412
ENSG00000008517	IL32	chr16:3115297-3137101	162.969
ENSG00000104774	MAN2B1	chr19:12754088-12792716	162.727
ENSG00000121064	SCPEP1	chr17:55055465-55084129	162.709
ENSG00000106153	CHCHD2	chr7:56169261-56174269	161.555
ENSG00000173915	USMG5	chr10:105127723-105156223	161.539
ENSG00000135486	HNRNPA1	chr12:54624723-54745633	161.39
ENSG00000104894	CD37	chr19:49834873-49891338	161.043
ENSG00000051108	HERPUD1	chr16:56965959-56977798	160.919
ENSG00000113648	H2AFY	chr5:134363424-134736986	160.727
ENSG00000116251	RPL22	chr1:6241328-6296032	160.328
ENSG00000178741	COX5A	chr15:75212131-75230509	160.318
ENSG00000231767	MIR4426	chr1:192685312-192685783	160.151
ENSG00000198563	DDX39B	chr6:31496493-31526606	159.449
ENSG00000104805	NUCB1	chr19:49403306-49426629	159.052
ENSG00000161547	SRSF2	chr17:74722911-74777531	158.579
ENSG00000089280	FUS	chr16:31191430-31203127	158.024
ENSG00000092010	PSME1	chr14:24605366-24610797	157.886
ENSG00000145425	RPS3A	chr4:152020724-152246784	156.978
ENSG00000115677	HDLBP	chr2:242166678-242293442	156.968
ENSG00000100911	PSME2	chr14:24612573-24636611	156.69
ENSG00000124357	NAGK	chr2:71163011-71306935	156.249
ENSG00000240065	PSMB9	chr6:32808493-32827362	156.082
ENSG00000111275	ALDH2	chr12:112123856-112247782	156.059
ENSG00000168385	SEPT2	chr2:242166678-242293442	156.028
ENSG00000198832	SELM	chr22:31500757-31516055	155.912
ENSG00000229119	CTB-63M22.1	chr5:165809309-165809604	155.83
ENSG00000231925	TAPBP	chr6:33267470-33282164	155.079
ENSG00000146066	HIGD2A	chr5:175792470-175843570	154.793
ENSG00000108639	SYNGR2	chr17:76164638-76169608	154.78
ENSG00000140319	SRP14	chr15:40327939-40331389	154.365
ENSG00000176978	DPP7	chr9:140004993-140009629	154.146
ENSG00000235297	FAUP1	chr18:72057118-72057532	153.856
ENSG00000155659	VSIG4	chrX:65241579-65259967	153.719
ENSG00000177575	CD163	chr12:7499280-7656489	153.332
ENSG00000070831	CDC42	chr1:22379119-22419437	152.978
ENSG00000156976	EIF4A2	chr3:186499568-186524847	152.431
ENSG00000154096	THY1	chr11:119252487-119397374	152.241
ENSG00000148834	GSTO1	chr10:105995113-106027217	151.862
ENSG00000129562	DAD1	chr14:23033804-23058175	151.639
ENSG00000010278	CD9	chr12:6308880-6347425	151.412
ENSG00000107551	RASSF4	chr10:45306471-45491339	151.221
ENSG00000122359	ANXA11	chr10:81910644-81965328	150.867
ENSG00000226084	RP4-706A16.3	chr1:77554674-77685115	150.805
ENSG00000147416	ATP6V1B2	chr8:20054877-20084330	150.672
ENSG00000004399	PLXND1	chr3:129274017-129325661	150.531
ENSG00000156467	UQCRB	chr8:97238147-97250262	150.527
ENSG00000170275	CRTAP	chr3:33155470-33189265	150.234
ENSG00000169245	CXCL10	chr4:76932336-77033955	150.019
ENSG00000161203	AP2M1	chr3:183851806-184402546	149.915
ENSG00000160932	LY6E	chr8:144063154-144105249	149.584
ENSG00000112335	SNX3	chr6:108532425-108582464	149.306
ENSG00000135940	COX5B	chr2:98262502-98264846	148.333
ENSG00000135535	CD164	chr6:109687716-109703762	147.995
ENSG00000172354	GNB2	chr7:100271153-100276797	147.936
ENSG00000229164	TRAC	chr14:23016446-23021097	147.905
ENSG00000133639	BTG1	chr12:92378755-92583436	147.79
ENSG00000144746	ARL6IP5	chr3:69134094-69155217	147.389
ENSG00000127022	CANX	chr5:179105583-179157926	147.314
ENSG00000064601	CTSA	chr20:44517263-44540794	147.309
ENSG00000138071	ACTR2	chr2:65454886-65498387	146.011
ENSG00000154518	ATP5G3	chr2:176040985-176049335	145.929
ENSG00000104408	EIF3E	chr8:109213444-109447562	145.757
ENSG00000075785	RAB7A	chr3:128444964-128533639	145.424
ENSG00000118855	MFSD1	chr3:158414680-158547508	145.388
ENSG00000101294	HM13	chr20:30102230-30161066	145.179
ENSG00000129009	ISLR	chr15:74445140-74471567	144.596
ENSG00000111799	COL12A1	chr6:75794041-75915767	144.454
ENSG00000148175	STOM	chr9:124101354-124132531	144.169
ENSG00000064666	CNN2	chr19:1026297-1039068	144.026
ENSG00000123384	LRP1	chr12:57482676-57607134	143.838
ENSG00000067167	TRAM1	chr8:71485676-71520622	143.671
ENSG00000102096	PIM2	chrX:48770458-48776301	143.32
ENSG00000185834	RPL12P4	chr20:53691154-53691685	143.284
ENSG00000183255	PTTG1IP	chr21:46269499-46293752	143.227
ENSG00000113269	RNF130	chr5:179338650-179499118	142.993
ENSG00000002549	LAP3	chr4:17578814-17616194	142.841
ENSG00000010610	CD4	chr12:6896023-6929974	142.777
ENSG00000174886	NDUFA11	chr19:5865836-5904017	142.568
ENSG00000128016	ZFP36	chr19:39897452-39900052	142.108
ENSG00000092199	HNRNPC	chr14:21677294-21737653	141.646
ENSG00000168374	ARF4	chr3:57557089-57586654	141.556
ENSG00000128340	RAC2	chr22:37621300-37640488	141.438
ENSG00000111716	LDHB	chr12:21788275-21928515	141
ENSG00000140678	ITGAX	chr16:31366454-31394318	140.961
ENSG00000211890	IGHA2	chr14:106053225-106054732	140.771
ENSG00000149257	SERPINH1	chr11:75273100-75283828	140.606
ENSG00000090266	NDUFB2	chr7:140218219-140624564	140.259
ENSG00000235655	H3F3AP4	chr2:175411868-175639555	140.17
ENSG00000174021	GNG5	chr1:84964007-85040163	139.989
ENSG00000009307	CSDE1	chr1:115259533-115301297	139.743
ENSG00000183648	NDUFB1	chr14:92582465-92588261	139.738
ENSG00000141526	SLC16A3	chr17:80186272-80231607	139.734
ENSG00000157514	TSC22D3	chrX:106956450-107020572	139.658
ENSG00000025434	NR1H3	chr11:47260852-47290396	139.387
ENSG00000105640	RPL18A	chr19:17970684-17974962	139.349
ENSG00000167615	LENG8	chr19:54955990-54974894	139.167
ENSG00000100292	HMOX1	chr22:35776353-35790207	139.032
ENSG00000143226	FCGR2A	chr1:161475219-161648444	138.649
ENSG00000113558	SKP1	chr5:133450401-133706738	138.603
ENSG00000157873	TNFRSF14	chr1:2481358-2496821	138.482
ENSG00000185825	BCAP31	chrX:152965946-152990152	138.265
ENSG00000254999	BRK1	chr3:10157275-10168874	138.139
ENSG00000141480	ARRB2	chr17:4613783-4624794	137.609
ENSG00000006075	CCL3	chr17:34400225-34417515	137.299
ENSG00000136003	ISCU	chr12:108956357-108963160	137.204
ENSG00000111144	LTA4H	chr12:96390298-96437298	136.896
ENSG00000152795	HNRNPDL	chr4:83343716-83351294	136.894
ENSG00000105438	KDELR1	chr19:48885826-48894810	136.874
ENSG00000172037	LAMB2	chr3:49158546-49170551	136.857
ENSG00000266714	MYO15B	chr17:73584138-73704142	136.467
ENSG00000224650	IGHV3-74	chr14:107218675-107219365	136.381
ENSG00000101182	PSMA7	chr20:60711790-60718496	136.326
ENSG00000167283	ATP5L	chr11:118230299-118302211	136.201
ENSG00000111678	C12orf57	chr12:7052140-7055166	136.092
ENSG00000105374	NKG7	chr19:51874859-51875969	135.975
ENSG00000078369	GNB1	chr1:1716728-1822495	135.545
ENSG00000103363	TCEB2	chr16:2787076-2827298	135.471
ENSG00000116209	TMEM59	chr1:54497346-54519177	135.081
ENSG00000109332	UBE2D3	chr4:103715539-103790053	135.022
ENSG00000071553	ATP6AP1	chrX:153656977-153664862	134.871
ENSG00000196683	TOMM7	chr7:22852250-22862470	134.688
ENSG00000112695	COX7A2	chr6:75947390-75960039	134.101
ENSG00000100345	MYH9	chr22:36677326-36784063	134.053
ENSG00000104824	HNRNPL	chr19:39306061-39342987	134.004
ENSG00000158714	SLAMF8	chr1:159796539-159869953	133.931
ENSG00000163463	KRTCAP2	chr1:155141883-155162707	133.902
ENSG00000118515	SGK1	chr6:134490383-134639250	133.697
ENSG00000062716	VMP1	chr17:57697218-57919616	133.577
ENSG00000076928	ARHGEF1	chr19:42387227-42434302	133.517
ENSG00000180353	HCLS1	chr3:121350245-121379774	133.415
ENSG00000229638	RPL4P4	chr3:185000728-185216845	133.415
ENSG00000136490	LIMD2	chr17:61699774-61778532	133.265
ENSG00000023191	RNH1	chr11:494511-507300	133.135
ENSG00000131669	NINJ1	chr9:95883770-95896570	133.133
ENSG00000197766	CFD	chr19:859452-863453	133.084
ENSG00000104852	SNRNP70	chr19:49588675-49611862	133.014
ENSG00000114902	SPCS1	chr3:52529353-52742182	132.88
ENSG00000038945	MSR1	chr8:15965386-16424999	132.419
ENSG00000231475	IGHV4-31	chr14:106805208-106805716	132.311
ENSG00000134028	ADAMDEC1	chr8:24151552-24769586	132.031
ENSG00000042753	AP2S1	chr19:47341392-47354249	131.804
ENSG00000143196	DPT	chr1:168664696-168698502	131.728
ENSG00000240509	RPL34P18	chr8:94969565-94969919	131.671
ENSG00000105401	CDC37	chr19:10501809-10580305	131.649
ENSG00000178982	EIF3K	chr19:39109734-39127595	131.493
ENSG00000146278	PNRC1	chr6:89790469-89794879	131.189
ENSG00000205220	PSMB10	chr16:67927174-67970990	131.031
ENSG00000115956	PLEK	chr2:68588345-68624585	131
ENSG00000269242	CTD-2192J16.22	chr19:12754088-12792716	130.812
ENSG00000080824	HSP90AA1	chr14:102547074-102771537	130.67
ENSG00000239855	IGKV1-6	chr2:89265780-89266286	130.404
ENSG00000226564	FTH1P20	chr2:181737593-181738141	129.979
ENSG00000142657	PGD	chr1:10458648-10480201	129.849
ENSG00000142192	APP	chr21:27252860-27589700	129.825
ENSG00000151366	NDUFC2	chr11:77726760-77791265	129.209
ENSG00000084234	APLP2	chr11:129936835-130014699	128.729
ENSG00000148248	SURF4	chr9:136228324-136242970	128.727
ENSG00000012779	ALOX5	chr10:45869660-45948569	128.632
ENSG00000183291	SEPT15	chr1:87328131-87380107	128.583
ENSG00000253364	RP11-731F5.2	chr14:106109388-106115394	128.574
ENSG00000011422	PLAUR	chr19:44150246-44174699	128.343
ENSG00000023902	PLEKHO1	chr1:150121372-150136916	128.327
ENSG00000126709	IFI6	chr1:27992571-27998729	128.163
ENSG00000232472	EEF1B2P3	chrX:24712035-25015103	128.067
ENSG00000265681	RPL17	chr18:47008027-47018906	128.003
ENSG00000118816	CCNI	chr4:77968310-77997158	127.946
ENSG00000135677	GNS	chr12:65107224-65153227	127.946
ENSG00000184840	TMED9	chr5:177019158-177023125	127.906
ENSG00000244682	FCGR2C	chr1:161475219-161648444	127.901
ENSG00000128245	YWHAH	chr22:32329506-32353590	127.873
ENSG00000211974	IGHV2-70	chr14:107178819-107179338	127.716
ENSG00000130303	BST2	chr19:17513747-17516457	127.666
ENSG00000183160	TMEM119	chr12:108983621-108992096	127.536
ENSG00000105404	RABAC1	chr19:42460832-42463542	127.495
ENSG00000136238	RAC1	chr7:6414153-6443608	127.43
ENSG00000149781	FERMT3	chr11:63974149-64001824	127.388
ENSG00000116459	ATP5F1	chr1:111981259-112005395	127.17
ENSG00000204262	COL5A2	chr2:189896621-190044605	127.166
ENSG00000213928	IRF9	chr14:24612573-24636611	127.166
ENSG00000213614	HEXA	chr15:72533521-72671129	126.961
ENSG00000081237	PTPRC	chr1:198607800-198726545	126.902
ENSG00000244038	DDOST	chr1:20959947-20988000	126.829
ENSG00000244716	RP11-20O24.4	chr1:109512835-109584850	126.545
ENSG00000166913	YWHAB	chr20:43514316-43537173	126.455
ENSG00000131051	RBM39	chr20:34291530-34330234	126.324
ENSG00000003056	M6PR	chr12:9066491-9102551	126.205
ENSG00000058262	SEC61A1	chr3:127770483-128127485	126.196
ENSG00000134825	TMEM258	chr11:61447904-61634826	126.123
ENSG00000169567	HINT1	chr5:130494719-130541119	125.672
ENSG00000177156	TALDO1	chr11:747328-765024	125.605
ENSG00000105698	USF2	chr19:35759880-35770724	125.177
ENSG00000090520	DNAJB11	chr3:186256229-186315061	125.024
ENSG00000168394	TAP1	chr6:32808493-32827362	124.593
ENSG00000204482	LST1	chr6:31553900-31560762	124.364
ENSG00000204103	MAFB	chr20:39314487-39317880	123.721
ENSG00000106483	SFRP4	chr7:37723398-38065297	123.269
ENSG00000205352	PRR13	chr12:53835388-53893847	122.969
ENSG00000116288	PARK7	chr1:8014350-8045565	122.822
ENSG00000166927	MS4A7	chr11:60102303-60185161	122.578
ENSG00000147677	EIF3H	chr8:117654368-117889107	121.786
ENSG00000122705	CLTA	chr9:36190852-36304921	121.414
ENSG00000179010	MRFAP1	chr4:6641817-6644472	120.955
ENSG00000241837	ATP5O	chr21:34876237-35349992	120.774
ENSG00000229117	RPL41	chr12:56510369-56511727	120.752
ENSG00000170581	STAT2	chr12:56735380-56753939	120.736
ENSG00000149591	TAGLN	chr11:117070036-117103241	120.698
ENSG00000177885	GRB2	chr17:73314156-73401790	120.402
ENSG00000038427	VCAN	chr5:82767283-82878122	120.402
ENSG00000043462	LCP2	chr5:169659450-169725231	120.12
ENSG00000142552	RCN3	chr19:50030874-50050219	119.924
ENSG00000100234	TIMP3	chr22:32908538-33454358	119.907
ENSG00000138069	RAB1A	chr2:65283499-65357240	119.862
ENSG00000189343	RPS2P46	chr17:19342455-19364308	119.682
ENSG00000140575	IQGAP1	chr15:90931449-91045475	119.316
ENSG00000168653	NDUFS5	chr1:39491989-39500308	118.973
ENSG00000123131	PRDX4	chrX:23682378-23704516	118.77
ENSG00000235912	RP1-159A19.3	chr1:27975929-27976121	118.679
ENSG00000214485	RPL7P1	chr5:149432853-149492935	118.606
ENSG00000167613	LAIR1	chr19:54865361-54882165	118.592
ENSG00000173821	RNF213	chr17:78234664-78411886	118.301
ENSG00000002933	TMEM176A	chr7:150488372-150502208	117.722
ENSG00000104419	NDRG1	chr8:134249413-134314265	117.571
ENSG00000204264	PSMB8	chr6:32808493-32827362	117.556
ENSG00000115091	ACTR3	chr2:114647536-114720173	117.483
ENSG00000198830	HMGN2	chr1:26798940-26802463	117.45
ENSG00000170801	HTRA3	chr4:8271491-8308838	117.24
ENSG00000113387	SUB1	chr5:32531738-32604185	117.177
ENSG00000159388	BTG2	chr1:203274618-203278730	117.157
ENSG00000154451	GBP5	chr1:89724632-89738544	117.153
ENSG00000137767	SQRDL	chr15:45879320-45983492	117.031
ENSG00000175390	EIF3F	chr11:7991797-8023409	116.829
ENSG00000105583	WDR83OS	chr19:12754088-12792716	116.825
ENSG00000111341	MGP	chr12:14956505-15059520	116.779
ENSG00000155465	SLC7A7	chr14:23242430-23299029	116.728
ENSG00000090621	PABPC4	chr1:40026487-40042462	116.695
ENSG00000147168	IL2RG	chrX:70327253-70331958	116.683
ENSG00000115935	WIPF1	chr2:175411868-175639555	116.64
ENSG00000168899	VAMP5	chr2:85811530-85820535	116.498
ENSG00000137491	SLCO2B1	chr11:74810216-74917594	116.216
ENSG00000176046	NUPR1	chr16:28548605-28550495	116.087
ENSG00000156587	UBE2L6	chr11:57319128-57335757	115.905
ENSG00000177105	RHOG	chr11:3848207-3862213	115.842
ENSG00000108953	YWHAE	chr17:1247565-1303672	115.393
ENSG00000091986	CCDC80	chr3:112323406-112368377	115.309
ENSG00000167552	TUBA1A	chr12:49578578-49667114	115.3
ENSG00000135916	ITM2C	chr2:231729353-231743963	115.175
ENSG00000182117	NOP10	chr15:34633916-34635378	114.946
ENSG00000116560	SFPQ	chr1:35641978-35658749	114.797
ENSG00000115523	GNLY	chr2:85912297-85925977	114.518
ENSG00000132432	SEC61G	chr7:54819942-54872621	114.509
ENSG00000138668	HNRNPD	chr4:83273650-83305180	114.497
ENSG00000164405	UQCRQ	chr5:132196872-132203723	114.471
ENSG00000214736	TOMM6	chr6:41737913-41863099	114.092
ENSG00000011304	PTBP1	chr19:797074-812327	113.921
ENSG00000229230	MT1P3	chr20:33703166-33872788	113.856
ENSG00000126432	PRDX5	chr11:64085559-64089283	113.765
ENSG00000228929	RP11-159C21.4	chr1:53192125-53293014	113.666
ENSG00000057608	GDI2	chr10:5807185-5884095	113.589
ENSG00000086598	TMED2	chr12:124066766-124083116	113.526
ENSG00000177556	ATOX1	chr5:151121876-151192346	113.499
ENSG00000130175	PRKCSH	chr19:11531271-11561783	113.41
ENSG00000249936	RAC1P2	chr4:46725792-46726625	113.408
ENSG00000108774	RAB5C	chr17:40265125-40307990	113.362
ENSG00000108294	PSMB3	chr17:36908988-36920484	113.357
ENSG00000117362	APH1A	chr1:150237803-150253327	113.321
ENSG00000118705	RPN2	chr20:35729628-35870022	113.278
ENSG00000125743	SNRPD2	chr19:46190711-46207247	113.099
ENSG00000150687	PRSS23	chr11:86502100-86666433	112.915
ENSG00000250479	CHCHD10	chr22:24105207-24126503	112.809
ENSG00000105701	FKBP8	chr19:18642422-18654887	112.801
ENSG00000176845	METRNL	chr17:81037566-81052864	112.791
ENSG00000111679	PTPN6	chr12:7055630-7070479	112.661
ENSG00000146112	PPP1R18	chr6:30644165-30655672	112.45
ENSG00000166562	SEC11C	chr18:56806708-56826068	112.392
ENSG00000105397	TYK2	chr19:10461208-10491352	112.284
ENSG00000117228	GBP1	chr1:89518001-89531043	112.202
ENSG00000140612	SEC11A	chr15:85212774-85259947	111.648
ENSG00000155957	TMBIM4	chr12:66516841-66563852	111.644
ENSG00000152082	MZT2B	chr2:130908980-130948302	111.472
ENSG00000099331	MYO9B	chr19:17186590-17325346	111.388
ENSG00000137573	SULF1	chr8:70378858-70573150	111.31
ENSG00000116701	NCF2	chr1:183441350-183567381	111.275
ENSG00000159128	IFNGR2	chr21:34775201-34852318	111.235
ENSG00000213977	TAX1BP3	chr17:3566195-3599698	111.152
ENSG00000111775	COX6A1	chr12:120875892-120899389	111.14
ENSG00000120129	DUSP1	chr5:172185228-172204777	111.076
ENSG00000143543	JTB	chr1:153931574-153950164	111.046
ENSG00000026751	SLAMF7	chr1:160709036-160724611	110.989
ENSG00000071127	WDR1	chr4:10075962-10118573	110.763
ENSG00000120742	SERP1	chr3:150259780-150348222	110.72
ENSG00000086300	SNX10	chr7:26331540-26416321	110.691
ENSG00000108946	PRKAR1A	chr17:66255322-66760023	110.512
ENSG00000176788	BASP1	chr5:17065706-17276943	110.304
ENSG00000117091	CD48	chr1:160639937-160681641	110.207
ENSG00000197744	PTMAP2	chr5:118173016-118324240	110.171
ENSG00000173511	VEGFB	chr11:64002009-64006259	110.023
ENSG00000128595	CALU	chr7:128379345-128411861	109.93
ENSG00000178927	C17orf62	chr17:80347098-80408705	109.737
ENSG00000089820	ARHGAP4	chrX:153126968-153200676	109.683
ENSG00000105669	COPE	chr19:19010322-19057640	109.649
ENSG00000143870	PDIA6	chr2:10861774-10978103	109.401
ENSG00000187474	FPR3	chr19:52248424-52329442	109.296
ENSG00000170348	TMED10	chr14:75548821-75643334	109.256
ENSG00000044574	HSPA5	chr9:127997131-128003609	109.221
ENSG00000142634	EFHD2	chr1:15736390-15756839	109.209
ENSG00000072274	TFRC	chr3:195754053-195809060	109.117
ENSG00000138293	NCOA4	chr10:51565107-51590734	109.091
ENSG00000172053	QARS	chr3:49133364-49142553	109.066
ENSG00000084070	SMAP2	chr1:40810521-40888998	109.006
ENSG00000178980	SEPW1	chr19:48281828-48287943	108.933
ENSG00000167397	VKORC1	chr16:31085742-31107301	108.772
ENSG00000008018	PSMB1	chr6:170844204-170862429	108.762
ENSG00000073921	PICALM	chr11:85668726-85780924	108.678
ENSG00000125347	IRF1	chr5:131817300-131826490	108.589
ENSG00000198856	OSTC	chr4:109571739-109588976	108.013
ENSG00000155366	RHOC	chr1:113243727-113258099	107.898
ENSG00000167863	ATP5H	chr17:73028669-73061984	107.869
ENSG00000089220	PEBP1	chr12:118501397-118583389	107.348
ENSG00000169413	RNASE6	chr14:21249209-21250626	107.124
ENSG00000138080	EMILIN1	chr2:27301434-27309271	107.11
ENSG00000180867	PDIA3P1	chr1:146644349-146767443	107.053
ENSG00000099624	ATP5D	chr19:1241748-1244824	106.751
ENSG00000130775	THEMIS2	chr1:28199054-28213196	106.587
ENSG00000099795	NDUFB7	chr19:14676889-14682874	106.407
ENSG00000129084	PSMA1	chr11:14464985-14665181	106.005
ENSG00000198918	RPL39	chrX:118920466-118925606	105.582
ENSG00000163902	RPN1	chr3:128338816-128399918	105.532
ENSG00000069849	ATP1B3	chr3:141594965-141645356	105.376
ENSG00000149100	EIF3M	chr11:32605343-32816204	105.342
ENSG00000125991	ERGIC3	chr20:34129769-34145405	105.194
ENSG00000166825	ANPEP	chr15:90328119-90358633	104.923
ENSG00000237541	HLA-DQA2	chr6:32709118-32714992	104.832
ENSG00000164032	H2AFZ	chr4:100869242-101136662	104.672
ENSG00000175482	POLD4	chr11:67118247-67141648	104.588
ENSG00000182578	CSF1R	chr5:149432853-149492935	104.569
ENSG00000110324	IL10RA	chr11:117857062-117872196	104.181
ENSG00000214063	TSPAN4	chr11:842807-867116	104.07
ENSG00000182149	IST1	chr16:71879893-71962913	104.05
ENSG00000161091	MFSD12	chr19:3506270-3579086	103.919
ENSG00000174807	CD248	chr11:66080323-66086708	103.797
ENSG00000140400	MAN2C1	chr15:75648132-75748183	103.657
ENSG00000164054	SHISA5	chr3:48509196-48542259	103.533
ENSG00000166278	C2	chr6:31865561-31919861	103.517
ENSG00000132341	RAN	chr12:131356423-131362223	103.372
ENSG00000148908	RGS10	chr10:121259339-121302220	103.335
ENSG00000242076	IGKV1-33	chr2:89567757-89568263	103.292
ENSG00000106819	ASPN	chr9:95059639-95432547	103.176
ENSG00000184007	PTP4A2	chr1:32307619-32410457	103.111
ENSG00000090104	RGS1	chr1:192544856-192549161	103.049
ENSG00000177731	FLII	chr17:18128900-18162230	103.026
ENSG00000135926	TMBIM1	chr2:219135114-219232822	102.615
ENSG00000136240	KDELR2	chr7:6448756-6524873	102.508
ENSG00000090238	YPEL3	chr16:30103634-30115437	102.477
ENSG00000130811	EIF3G	chr19:10216898-10230596	102.303
ENSG00000143198	MGST3	chr1:165600097-165631033	102.066
ENSG00000183726	TMEM50A	chr1:25568727-25756683	102.023
ENSG00000175826	CTDNEP1	chr17:7143332-7167302	101.88
ENSG00000013364	MVP	chr16:29817426-29859355	101.75
ENSG00000204435	CSNK2B	chr6:31629005-31641553	101.703
ENSG00000204252	HLA-DOA	chr6:32971954-32977389	101.643
ENSG00000149932	TMEM219	chr16:29952205-29984373	101.643
ENSG00000160789	LMNA	chr1:156052363-156109880	101.577
ENSG00000188820	FAM26F	chr6:116781901-116784934	101.502
ENSG00000005893	LAMP2	chrX:119561681-119603220	101.28
ENSG00000221978	CCNL2	chr1:1321090-1334708	101.227
ENSG00000026297	RNASET2	chr6:166822851-167370679	101.014
ENSG00000115053	NCL	chr2:232318241-232348352	100.895
ENSG00000136295	TTYH3	chr7:2671584-2704436	100.884
ENSG00000184640	SEPT9	chr17:75253818-75496678	100.789
ENSG00000168066	SF1	chr11:64532077-64546258	100.765
ENSG00000110492	MDK	chr11:46402305-46405375	100.625
ENSG00000173020	ADRBK1	chr11:67033880-67054027	100.545
ENSG00000109046	WSB1	chr17:25621101-25640657	100.544
ENSG00000211685	IGLC7	chr22:23264765-23265203	100.517
ENSG00000129277	CCL4	chr17:34430982-34433014	100.496
ENSG00000087088	BAX	chr19:49458071-49465055	100.376
ENSG00000168209	DDIT4	chr10:74033677-74035794	100.356
ENSG00000011028	MRC2	chr17:60704761-60770958	99.6137
ENSG00000102007	PLP2	chrX:49028272-49042845	99.5068
ENSG00000014641	MDH1	chr2:63348517-64054977	99.259
ENSG00000177706	FAM20C	chr7:182934-300711	99.2072
ENSG00000179163	FUCA1	chr1:24171566-24194784	99.1327
ENSG00000127951	FGL2	chr7:76139744-77045717	98.992
ENSG00000124762	CDKN1A	chr6:36644304-36655116	98.9347
ENSG00000165280	VCP	chr9:35056060-35073246	98.6825
ENSG00000166482	MFAP4	chr17:19240866-19290553	98.3451
ENSG00000173113	TRMT112	chr11:64073043-64085556	97.8744
ENSG00000105329	TGFB1	chr19:41768400-41930910	97.8622
ENSG00000110958	PTGES3	chr12:57057126-57082159	97.6585
ENSG00000002834	LASP1	chr17:37026111-37078023	97.6033
ENSG00000130309	COLGALT1	chr19:17666402-17693971	97.5227
ENSG00000160014	CALM3	chr19:46984052-47114050	97.4067
ENSG00000171867	PRNP	chr20:4666881-4682236	97.2687
ENSG00000133313	CNDP2	chr18:72163050-72188366	97.2549
ENSG00000018280	SLC11A1	chr2:219246751-219261617	97.2326
ENSG00000099958	DERL3	chr22:24129149-24181315	97.0925
ENSG00000147684	NDUFB9	chr8:125500725-125740730	97.0565
ENSG00000163565	IFI16	chr1:158969757-159024945	97.0045
ENSG00000154723	ATP5J	chr21:27011583-27144771	96.6747
ENSG00000129559	NEDD8	chr14:24641061-24708448	96.6496
ENSG00000167792	NDUFV1	chr11:67374322-67380006	96.5335
ENSG00000170540	ARL6IP1	chr16:18792616-18813000	96.4384
ENSG00000171298	GAA	chr17:78075354-78093678	96.3693
ENSG00000112308	C6orf62	chr6:24667262-24721064	96.3559
ENSG00000078808	SDF4	chr1:1152287-1167411	96.3075
ENSG00000108828	VAT1	chr17:41166621-41177140	96.2217
ENSG00000172531	PPP1CA	chr11:67159175-67193078	96.2159
ENSG00000161955	TNFSF13	chr17:7452207-7464925	95.9125
ENSG00000211970	IGHV4-61	chr14:107095125-107095662	95.7574
ENSG00000132274	TRIM22	chr11:5684424-5959849	95.7497
ENSG00000182196	ARL6IP4	chr12:123405497-123467456	95.6637
ENSG00000156411	C14orf2	chr14:104378624-104394606	95.6074
ENSG00000168906	MAT2A	chr2:85766287-85788670	95.5451
ENSG00000165629	ATP5C1	chr10:7830091-7849778	95.5324
ENSG00000130770	ATPIF1	chr1:28562619-28573417	95.1825
ENSG00000111786	SRSF9	chr12:120899470-120907596	95.1721
ENSG00000186010	NDUFA13	chr19:19623226-19648390	94.9916
ENSG00000100243	CYB5R3	chr22:43013845-43045574	94.9509
ENSG00000101421	CHMP4B	chr20:32399109-32442172	94.9302
ENSG00000147140	NONO	chrX:70503041-70521018	94.8717
ENSG00000204256	BRD2	chr6:32902405-32949282	94.7425
ENSG00000114867	EIF4G1	chr3:183851806-184402546	94.6972
ENSG00000168461	RAB31	chr18:9708161-9862548	94.4863
ENSG00000173660	UQCRH	chr1:46769302-46782448	94.4394
ENSG00000086062	B4GALT1	chr9:33104079-33179981	94.4352
ENSG00000106991	ENG	chr9:130577290-130617035	94.3432
ENSG00000197629	MPEG1	chr11:58938902-58980424	94.3362
ENSG00000004059	ARF5	chr7:127220671-127242198	94.2554
ENSG00000171159	C9orf16	chr9:130922538-130926207	94.1667
ENSG00000185862	EVI2B	chr17:29335514-29709134	94.1647
ENSG00000189403	HMGB1	chr13:31032883-31191734	94.0219
ENSG00000170248	PDCD6IP	chr3:33839843-33911194	93.9518
ENSG00000162645	GBP2	chr1:89571814-89641723	93.9359
ENSG00000168003	SLC3A2	chr11:62623517-62656352	93.9262
ENSG00000100632	ERH	chr14:69846847-69929105	93.8867
ENSG00000103495	MAZ	chr16:29817426-29859355	93.8814
ENSG00000136888	ATP6V1G1	chr9:117350025-117360653	93.8486
ENSG00000118523	CTGF	chr6:132269315-132398533	93.7447
ENSG00000106066	CPVL	chr7:29019582-29603286	93.7354
ENSG00000140931	CMTM3	chr16:66637776-66647795	93.6957
ENSG00000116016	EPAS1	chr2:46520805-46613836	93.6581
ENSG00000155463	OXA1L	chr14:23171351-23241007	93.5625
ENSG00000090339	ICAM1	chr19:10362576-10399695	93.476
ENSG00000137409	MTCH1	chr6:36935916-36954074	93.4736
ENSG00000125970	RALY	chr20:32570857-32700138	93.4651
ENSG00000122565	CBX3	chr7:26229546-26252976	93.4508
ENSG00000089063	TMEM230	chr20:5080485-5093749	93.4396
ENSG00000135441	BLOC1S1	chr12:56075329-56118489	93.3675
ENSG00000196562	SULF2	chr20:46130600-46415360	93.284
ENSG00000112514	CUTA	chr6:33378175-33386094	93.2099
ENSG00000150093	ITGB1	chr10:33189246-33371030	93.1587
ENSG00000134308	YWHAQ	chr2:9724100-9771143	93.1587
ENSG00000188186	LAMTOR4	chr7:99746529-99756338	93.1233
ENSG00000177410	ZFAS1	chr20:47835883-47905797	93.0914
ENSG00000170043	TRAPPC1	chr17:7825176-7853236	92.9978
ENSG00000110108	TMEM109	chr11:60680637-60720002	92.8619
ENSG00000182944	EWSR1	chr22:29655840-29696515	92.7298
ENSG00000140391	TSPAN3	chr15:77336021-77376326	92.5636
ENSG00000125356	NDUFA1	chrX:119004496-119010625	92.4752
ENSG00000108691	CCL2	chr17:32581899-32584222	92.3198
ENSG00000159674	SPON2	chr4:1160719-1202750	92.3177
ENSG00000119729	RHOQ	chr2:46717888-46852881	92.2012
ENSG00000116171	SCP2	chr1:53392900-53517375	92.1339
ENSG00000255594	Z82188.1	chr22:37621300-37640488	92.0561
ENSG00000204463	BAG6	chr6:31606804-31625987	92.043
ENSG00000198959	TGM2	chr20:36756862-36794980	92.0181
ENSG00000060138	YBX3	chr12:10851682-10875911	91.8104
ENSG00000101084	C20orf24	chr20:34894257-35274619	91.7453
ENSG00000100644	HIF1A	chr14:62147758-62263146	91.7059
ENSG00000101335	MYL9	chr20:34894257-35274619	91.6532
ENSG00000100364	KIAA0930	chr22:45586218-45636650	91.6006
ENSG00000163520	FBLN2	chr3:13573823-13679922	91.5569
ENSG00000141367	CLTC	chr17:57697218-57919616	91.502
ENSG00000085117	CD82	chr11:44585976-44641913	91.4788
ENSG00000227507	LTB	chr6:31548301-31550299	91.4346
ENSG00000074842	C19orf10	chr19:4639529-4670382	91.3664
ENSG00000143612	C1orf43	chr1:154179181-154243986	91.2705
ENSG00000108465	CDK5RAP3	chr17:46018871-46073562	91.2506
ENSG00000091527	CDV3	chr3:133292573-133309105	91.2048
ENSG00000253683	CTB-79E8.3	chr5:172068268-172124723	91.1146
ENSG00000134285	FKBP11	chr12:49297200-49351334	91.085
ENSG00000136689	IL1RN	chr2:113864790-113891593	91.0808
ENSG00000163931	TKT	chr3:53258722-53290068	90.9928
ENSG00000169976	SF3B5	chr6:144416017-144416754	90.9282
ENSG00000196954	CASP4	chr11:104813592-104840163	90.9241
ENSG00000159140	SON	chr21:34876237-35349992	90.6502
ENSG00000088882	CPXM1	chr20:2774714-2781283	90.6154
ENSG00000089248	ERP29	chr12:112451119-112461255	90.4713
ENSG00000173442	EHBP1L1	chr11:65343508-65360121	90.3748
ENSG00000153310	FAM49B	chr8:130844546-131029375	90.2248
ENSG00000186340	THBS2	chr6:169613348-169654139	90.2243
ENSG00000233913	CTC-575D19.1	chr5:168043316-168044059	90.158
ENSG00000187193	MT1X	chr16:56716335-56721964	90.1579
ENSG00000166337	TAF10	chr11:6624871-6633898	89.8615
ENSG00000111897	SERINC1	chr6:122764498-122792967	89.7856
ENSG00000166136	NDUFB8	chr10:102246398-102319755	89.7368
ENSG00000114850	SSR3	chr3:156257928-156272973	89.6855
ENSG00000067182	TNFRSF1A	chr12:6437922-6451280	89.5834
ENSG00000027697	IFNGR1	chr6:137518620-137540586	89.5416
ENSG00000122861	PLAU	chr10:75668934-75682535	89.5393
ENSG00000185787	MORF4L1	chr15:79051544-79190475	89.2223
ENSG00000095970	TREM2	chr6:41126243-41130924	89.107
ENSG00000125995	ROMO1	chr20:34213952-34288906	89.0617
ENSG00000103490	PYCARD	chr16:31212805-31214773	89.0176
ENSG00000256745	RP11-680H20.1	chr11:93921614-93922163	88.9779
ENSG00000177954	RPS27	chr1:153963234-153964626	88.9415
ENSG00000125868	DSTN	chr20:17550507-17590564	88.8703
ENSG00000186635	ARAP1	chr11:72396113-72504726	88.7932
ENSG00000215021	PHB2	chr12:7072407-7178336	88.7822
ENSG00000214548	MEG3	chr14:101245746-101327368	88.7553
ENSG00000116754	SRSF11	chr1:70671364-70718735	88.6205
ENSG00000218283	MORF4L1P1	chr1:220321634-220445796	88.5666
ENSG00000125835	SNRPB	chr20:2442279-2505348	88.4605
ENSG00000177697	CD151	chr11:818901-842545	88.4123
ENSG00000221869	CEBPD	chr8:48649470-48651648	88.3481
ENSG00000063046	EIF4B	chr12:53399941-53458156	88.1503
ENSG00000107372	ZFAND5	chr9:74966340-74980163	87.8462
ENSG00000145824	CXCL14	chr5:134895266-134970564	87.8385
ENSG00000130726	TRIM28	chr19:59055457-59062089	87.7907
ENSG00000143878	RHOB	chr2:20646834-20649200	87.7303
ENSG00000000938	FGR	chr1:27938574-27961788	87.6621
ENSG00000211611	IGKV6-21	chr2:89459234-89459850	87.4194
ENSG00000122545	SEPT7	chr7:35840541-35944917	87.3507
ENSG00000140740	UQCRC2	chr16:21963980-21994981	87.3148
ENSG00000116489	CAPZA1	chr1:113009162-113214241	87.3108
ENSG00000125971	DYNLRB1	chr20:33104213-33128762	87.2227
ENSG00000213402	PTPRCAP	chr11:67202980-67211292	87.2194
ENSG00000159720	ATP6V0D1	chr16:67471916-67515140	87.2179
ENSG00000119335	SET	chr9:131445702-131458679	87.1588
ENSG00000111237	VPS29	chr12:110928901-111021125	87.0987
ENSG00000087274	ADD1	chr4:2845583-2931803	87.0567
ENSG00000177469	PTRF	chr17:40554469-40575535	87.0411
ENSG00000134884	ARGLU1	chr13:107194020-107220512	86.9514
ENSG00000151726	ACSL1	chr4:185676748-185747972	86.9083
ENSG00000259261	IGHV4OR15-8	chr15:22472917-22473353	86.8045
ENSG00000169223	LMAN2	chr5:176758562-176778853	86.787
ENSG00000130755	GMFG	chr19:39818992-39833012	86.748
ENSG00000138085	ATRAID	chr2:27422454-27440046	86.6203
ENSG00000225217	HSPA7	chr1:161475219-161648444	86.5342
ENSG00000163399	ATP1A1	chr1:116915289-116961244	86.5133
ENSG00000175334	BANF1	chr11:65764015-65771620	86.495
ENSG00000178695	KCTD12	chr13:77454311-77460540	86.4801
ENSG00000142507	PSMB6	chr17:4699438-4701790	86.4703
ENSG00000100242	SUN2	chr22:39101727-39190203	86.4682
ENSG00000175550	DRAP1	chr11:65686727-65689032	86.456
ENSG00000169230	PRELID1	chr5:176728198-176739758	86.3956
ENSG00000184922	FMNL1	chr17:43268297-43394414	86.3621
ENSG00000106682	EIF4H	chr7:73588574-73611431	86.2414
ENSG00000109099	PMP22	chr17:15133094-15169024	86.1398
ENSG00000116132	PRRX1	chr1:170631868-170708560	86.0419
ENSG00000141002	TCF25	chr16:89939999-90005169	85.9794
ENSG00000137509	PRCP	chr11:82534543-82782965	85.9613
ENSG00000163162	RNF149	chr2:101887680-101925163	85.9083
ENSG00000101347	SAMHD1	chr20:35504523-35580246	85.86
ENSG00000100902	PSMA6	chr14:35514112-35786699	85.8536
ENSG00000089597	GANAB	chr11:62392297-62414104	85.7965
ENSG00000198931	APRT	chr16:88875746-88878352	85.7474
ENSG00000041357	PSMA4	chr15:78832746-78841604	85.723
ENSG00000134531	EMP1	chr12:13349649-13369708	85.6906
ENSG00000090487	SPG21	chr15:65255361-65282648	85.6427
ENSG00000079805	DNM2	chr19:10828754-10946994	85.6236
ENSG00000122034	GTF3A	chr13:27998680-28024739	85.539
ENSG00000085514	PILRA	chr7:99905324-99997719	85.5312
ENSG00000134590	FAM127A	chrX:134166332-134167576	85.4644
ENSG00000232112	TMA7	chr3:48473573-48488060	85.2491
ENSG00000105220	GPI	chr19:34850384-34919178	85.1115
ENSG00000165678	GHITM	chr10:85898175-85913001	85.1001
ENSG00000150337	FCGR1A	chr1:149754226-149783928	84.9507
ENSG00000065518	NDUFB4	chr3:120315155-120321347	84.9321
ENSG00000149357	LAMTOR1	chr11:71709586-71823826	84.9136
ENSG00000175215	CTDSP2	chr12:58213709-58240522	84.8737
ENSG00000214078	CPNE1	chr20:34213952-34288906	84.778
ENSG00000145649	GZMA	chr5:54398475-54406080	84.7594
ENSG00000249353	NPM1P27	chr5:92953774-93447404	84.7582
ENSG00000188612	SUMO2	chr17:73131342-73179078	84.7555
ENSG00000170906	NDUFA3	chr19:54606035-54635140	84.678
ENSG00000158517	NCF1	chr7:74071993-74306731	84.656
ENSG00000196923	PDLIM7	chr5:176910394-176938275	84.6557
ENSG00000169439	SDC2	chr8:97505578-97624000	84.5715
ENSG00000150593	PDCD4	chr10:112629500-112679032	84.4036
ENSG00000137076	TLN1	chr9:35696944-35758572	84.3436
ENSG00000132471	WBP2	chr17:73841779-73852588	84.2733
ENSG00000204387	C6orf48	chr6:31802384-31807541	84.1518
ENSG00000166797	FAM96A	chr15:64364757-64386217	83.9794
ENSG00000140983	RHOT2	chr16:718085-724174	83.9036
ENSG00000165672	PRDX3	chr10:120927214-120938345	83.8241
ENSG00000162745	OLFML2B	chr1:161952981-161993644	83.7782
ENSG00000169813	HNRNPF	chr10:43881064-43904614	83.7378
ENSG00000168264	IRF2BP2	chr1:234740014-234745271	83.2955
ENSG00000099341	PSMD8	chr19:38865175-38874464	83.1249
ENSG00000159692	CTBP1	chr4:1205235-1282079	83.034
ENSG00000071894	CPSF1	chr8:145596789-145634753	82.9774
ENSG00000204370	SDHD	chr11:111895537-112095422	82.9507
ENSG00000085662	AKR1B1	chr7:134127101-134144036	82.9446
ENSG00000129103	SUMF2	chr7:56131694-56148363	82.7978
ENSG00000117592	PRDX6	chr1:173446404-173457946	82.794
ENSG00000123146	CD97	chr19:14491312-14519537	82.7005
ENSG00000172243	CLEC7A	chr12:10269375-10282857	82.6073
ENSG00000130402	ACTN4	chr19:39138288-39260544	82.6004
ENSG00000171860	C3AR1	chr12:8210897-8219067	82.5328
ENSG00000168894	RNF181	chr2:85822847-85824736	82.4937
ENSG00000123562	MORF4L2	chrX:102930423-102946700	82.4402
ENSG00000140749	IGSF6	chr16:21608538-21668794	82.3231
ENSG00000013441	CLK1	chr2:201717731-201729422	82.186
ENSG00000133466	C1QTNF6	chr22:37521877-37595425	82.1358
ENSG00000198744	RP5-857K21.11	chr1:536815-660283	82.1006
ENSG00000134575	ACP2	chr11:47260852-47290396	82.0847
ENSG00000213585	VDAC1	chr5:133307605-133340824	82.0719
ENSG00000205581	HMGN1	chr21:40714240-40721573	82.0686
ENSG00000115307	AUP1	chr2:74753771-74784681	82.0433
ENSG00000167553	TUBA1C	chr12:49578578-49667114	81.922
ENSG00000213654	GPSM3	chr6:32158542-32191844	81.8398
ENSG00000253755	IGHGP	chr14:106130969-106136180	81.8199
ENSG00000225131	PSME2P2	chr13:49345263-49345965	81.6932
ENSG00000185088	RPS27L	chr15:63413998-63450220	81.69
ENSG00000162231	NXF1	chr11:62559594-62573774	81.6866
ENSG00000101336	HCK	chr20:30639990-30689659	81.2558
ENSG00000240834	IGKV1D-12	chr2:90198534-90199190	81.1503
ENSG00000152558	TMEM123	chr11:102267062-102369532	81.0216
ENSG00000126246	IGFLR1	chr19:36230057-36245420	81.0139
ENSG00000100353	EIF3D	chr22:36906896-36925483	80.9414
ENSG00000177989	ODF3B	chr22:50961996-50971009	80.8503
ENSG00000093010	COMT	chr22:19863039-20004331	80.7486
ENSG00000158717	RNF166	chr16:88762902-88772829	80.6923
ENSG00000175166	PSMD2	chr3:183851806-184402546	80.4992
ENSG00000088247	KHSRP	chr19:6413358-6424805	80.4928
ENSG00000105402	NAPA	chr19:47987538-48018497	80.46
ENSG00000174903	RAB1B	chr11:66036003-66056641	80.4237
ENSG00000140416	TPM1	chr15:63334830-63364114	80.4209
ENSG00000247596	TWF2	chr3:52255095-52275113	80.3276
ENSG00000157916	RER1	chr1:2323266-2345236	80.1824
ENSG00000160883	HK3	chr5:176237477-176326333	79.95
ENSG00000105369	CD79A	chr19:42381189-42385439	79.8736
ENSG00000136859	ANGPTL2	chr9:129677052-129985445	79.7853
ENSG00000166888	STAT6	chr12:57482676-57607134	79.7293
ENSG00000100823	APEX1	chr14:20923349-20929771	79.6854
ENSG00000224373	IGHV4-59	chr14:107081805-107083830	79.6738
ENSG00000153187	HNRNPU	chr1:244998623-245027844	79.6019
ENSG00000213886	UBD	chr6:29523291-29601753	79.5519
ENSG00000110696	C11orf58	chr11:15987994-16778428	79.548
ENSG00000143321	HDGF	chr1:156711898-156770607	79.4966
ENSG00000076944	STXBP2	chr19:7694622-7712759	79.4363
ENSG00000181029	TRAPPC5	chr19:7741513-7747744	79.3961
ENSG00000214253	FIS1	chr7:100882738-100895597	79.3046
ENSG00000142347	MYO1F	chr19:8585673-8642461	79.2859
ENSG00000138674	SEC31A	chr4:83739813-83934079	79.123
ENSG00000105887	MTPN	chr7:135611202-135662101	79.0206
ENSG00000184900	SUMO3	chr21:46225531-46238694	78.9631
ENSG00000100813	ACIN1	chr14:23527772-23569665	78.8086
ENSG00000145685	LHFPL2	chr5:77781037-78065844	78.7635
ENSG00000143742	SRP9	chr1:225965530-225978168	78.7585
ENSG00000165527	ARF6	chr14:50359809-50361490	78.7207
ENSG00000168488	ATXN2L	chr16:28834355-28848558	78.5895
ENSG00000188243	COMMD6	chr13:76099349-76123575	78.5624
ENSG00000211450	C11orf31	chr11:57480071-57587018	78.4528
ENSG00000125753	VASP	chr19:46009836-46030241	78.4102
ENSG00000136521	NDUFB5	chr3:179322477-179345435	78.3414
ENSG00000127540	UQCR11	chr19:1576638-1605480	78.3135
ENSG00000134107	BHLHE40	chr3:4938492-5027008	78.2088
ENSG00000254893	RP11-466P24.2	chr5:75377770-75649764	78.1835
ENSG00000169136	ATF5	chr19:50392910-50464429	78.1188
ENSG00000217555	CKLF	chr16:66586465-66613040	78.0985
ENSG00000126756	UXT	chrX:47511196-47519776	77.9265
ENSG00000198053	SIRPA	chr20:1875153-1920543	77.8108
ENSG00000233328	PFN1P1	chr1:171639656-171640079	77.7681
ENSG00000124193	SRSF6	chr20:42086567-42092245	77.7167
ENSG00000115738	ID2	chr2:8806765-8824583	77.6732
ENSG00000255302	EID1	chr15:49115931-49255641	77.6303
ENSG00000105254	TBCB	chr19:36602103-36616849	77.6256
ENSG00000214389	RPS3AP26	chr7:97881690-98030380	77.5124
ENSG00000166147	FBN1	chr15:48700502-48938046	77.4605
ENSG00000134871	COL4A2	chr13:110801317-111165374	77.452
ENSG00000034713	GABARAPL2	chr16:75562429-75657198	77.4024
ENSG00000197043	ANXA6	chr5:150480272-150537443	77.3005
ENSG00000168159	RNF187	chr1:228674761-228683467	77.2736
ENSG00000123689	G0S2	chr1:209834708-209908295	77.2459
ENSG00000110880	CORO1C	chr12:109038884-109125372	77.2432
ENSG00000103769	RAB11A	chr15:65903703-66184329	77.2309
ENSG00000100079	LGALS2	chr22:37966254-37978623	76.9339
ENSG00000133321	RARRES3	chr11:63304280-63313934	76.7627
ENSG00000136450	SRSF1	chr17:56066398-56084707	76.7056
ENSG00000122694	GLIPR2	chr9:36136731-36163910	76.7017
ENSG00000182871	COL18A1	chr21:46825051-46964325	76.4005
ENSG00000180448	HMHA1	chr19:1065921-1095598	76.3882
ENSG00000108669	CYTH1	chr17:76670129-76778379	76.3731
ENSG00000152291	TGOLN2	chr2:85545146-85555548	76.3275
ENSG00000152661	GJA1	chr6:121756837-121770873	76.1351
ENSG00000232629	HLA-DQB2	chr6:32723874-32731311	76.0956
ENSG00000167671	UBXN6	chr19:4402658-4457819	75.7845
ENSG00000153071	DAB2	chr5:39284363-39462402	75.7782
ENSG00000147162	OGT	chrX:70752932-70795747	75.7578
ENSG00000168036	CTNNB1	chr3:41236327-42003922	75.7304
ENSG00000180447	GAS1	chr9:89559278-89562104	75.7042
ENSG00000117616	C1orf63	chr1:25568727-25756683	75.6242
ENSG00000224864	CTC-260E6.2	chr19:20188802-20432114	75.5315
ENSG00000134851	TMEM165	chr4:56262123-56414056	75.4905
ENSG00000240583	AQP1	chr7:30692199-30965131	75.4891
ENSG00000162144	CYB561A3	chr11:61066922-61136981	75.3992
ENSG00000169504	CLIC4	chr1:25071847-25170815	75.3193
ENSG00000196419	XRCC6	chr22:42017122-42060044	75.3011
ENSG00000134248	LAMTOR5	chr1:110905469-110974982	75.206
ENSG00000159069	FBXW5	chr9:139834886-139839148	75.2002
ENSG00000116774	OLFML3	chr1:114522062-114524876	75.185
ENSG00000197451	HNRNPAB	chr5:177631507-177659792	75.1278
ENSG00000087302	C14orf166	chr14:52456192-52471420	75.1126
ENSG00000251562	MALAT1	chr11:65265232-65273940	75.111
ENSG00000124942	AHNAK	chr11:62201015-62323707	75.1109
ENSG00000140968	IRF8	chr16:85932408-85956215	75.1051
ENSG00000049656	CLPTM1L	chr5:1317858-1345214	75.0564
ENSG00000103653	CSK	chr15:75074397-75095539	75.0225
ENSG00000137841	PLCB2	chr15:40570376-40600136	74.9379
ENSG00000133835	HSD17B4	chr5:118788137-118972894	74.8771
ENSG00000161642	ZNF385A	chr12:54747444-54891472	74.8159
ENSG00000177674	AGTRAP	chr1:11796140-11814859	74.7814
ENSG00000111843	TMEM14C	chr6:10723147-10731362	74.6754
ENSG00000054148	PHPT1	chr9:139743175-139755249	74.6506
ENSG00000103145	HCFC1R1	chr16:3072620-3089134	74.4599
ENSG00000152601	MBNL1	chr3:151961616-152214602	74.41
ENSG00000110079	MS4A4A	chr11:60048013-60076445	73.885
ENSG00000198851	CD3E	chr11:118175259-118186890	73.7767
ENSG00000107738	C10orf54	chr10:73156690-73575702	73.7655
ENSG00000187498	COL4A1	chr13:110801317-111165374	73.6988
ENSG00000143110	C1orf162	chr1:112016413-112021134	73.563
ENSG00000112081	SRSF3	chr6:36562144-36573377	73.492
ENSG00000142168	SOD1	chr21:33031934-33041244	73.4865
ENSG00000089693	MLF2	chr12:6857169-6880116	73.3334
ENSG00000116871	MAP7D1	chr1:36621179-36646450	73.2623
ENSG00000144579	CTDSP1	chr2:219262978-219270664	73.2594
ENSG00000185236	RAB11B	chr19:8428172-8469318	73.0833
ENSG00000100664	EIF5	chr14:103799880-103811362	73.0669
ENSG00000269378	ITGB1P1	chr19:14729928-14889353	72.9994
ENSG00000244687	UBE2V1	chr20:48697660-48770335	72.8699
ENSG00000134046	MBD2	chr18:51679078-51751158	72.865
ENSG00000143418	CERS2	chr1:150898738-150948010	72.8108
ENSG00000177733	HNRNPA0	chr5:137087074-137090039	72.7003
ENSG00000219928	RP11-40C6.2	chr9:90112142-90323548	72.6121
ENSG00000241081	RP11-488C13.1	chr14:77352719-77353093	72.5554
ENSG00000178952	TUFM	chr16:28853731-28857729	72.3662
ENSG00000141524	TMC6	chr17:76000248-76139049	72.3251
ENSG00000105612	DNASE2	chr19:12986024-12994902	72.242
ENSG00000128284	APOL3	chr22:36536371-36562225	72.1532
ENSG00000141756	FKBP10	chr17:39968931-39979465	72.1147
ENSG00000115875	SRSF7	chr2:38970740-38978636	72.0824
ENSG00000140497	SCAMP2	chr15:75136070-75165706	72.0363
ENSG00000101558	VAPA	chr18:9913998-9960018	72.0149
ENSG00000111328	CDK2AP1	chr12:123636866-123756881	71.9838
ENSG00000197622	CDC42SE1	chr1:151020215-151042801	71.9345
ENSG00000197582	GPX1P1	chrX:13395306-13421138	71.7865
ENSG00000138964	PARVG	chr22:44568835-44615413	71.7525
ENSG00000136279	DBNL	chr7:44084238-44109055	71.7105
ENSG00000143420	ENSA	chr1:150573326-150602088	71.678
ENSG00000145901	TNIP1	chr5:150409505-150473138	71.6347
ENSG00000184076	UQCR10	chr22:30163357-30166402	71.5995
ENSG00000077454	LRCH4	chr7:100169854-100205798	71.5146
ENSG00000260032	LINC00657	chr20:34633543-34638882	71.2763
ENSG00000131174	COX7B	chrX:77154934-77162870	71.2653
ENSG00000102760	RGCC	chr13:42031694-42045018	71.1678
ENSG00000049245	VAMP3	chr1:7831328-7841492	71.0715
ENSG00000160593	AMICA1	chr11:118064454-118095809	71.0663
ENSG00000110057	UNC93B1	chr11:67758574-67772452	71.0628
ENSG00000178104	PDE4DIP	chr1:144836156-145076186	71.002
ENSG00000185339	TCN2	chr22:30972611-31023265	70.9486
ENSG00000160948	VPS28	chr8:145648999-145653931	70.8346
ENSG00000172428	MYEOV2	chr2:241065979-241076224	70.8126
ENSG00000096060	FKBP5	chr6:35541361-35696360	70.8012
ENSG00000028137	TNFRSF1B	chr1:12227059-12269285	70.7829
ENSG00000114978	MOB1A	chr2:74379654-74406025	70.6953
ENSG00000010256	UQCRC1	chr3:48636434-48648409	70.6783
ENSG00000182934	SRPR	chr11:126071992-126148026	70.5897
ENSG00000169715	MT1E	chr16:56659386-56661024	70.5878
ENSG00000105323	HNRNPUL1	chr19:41768400-41930910	70.5109
ENSG00000211445	GPX3	chr5:150400123-150408554	70.5069
ENSG00000105568	PPP2R1A	chr19:52693291-52734547	70.4842
ENSG00000079246	XRCC5	chr2:216972186-217071026	70.4253
ENSG00000116473	RAP1A	chr1:112025969-112310638	70.42
ENSG00000126860	EVI2A	chr17:29335514-29709134	70.4038
ENSG00000258315	C17orf49	chr17:6757179-6922978	70.3331
ENSG00000125304	TM9SF2	chr13:100153670-100216260	70.2953
ENSG00000006015	C19orf60	chr19:18682539-18731849	70.2368
ENSG00000177700	POLR2L	chr11:818901-842545	70.2345
ENSG00000010244	ZNF207	chr17:30593194-30708905	70.1395
ENSG00000117335	CD46	chr1:207925401-207968858	70.1325
ENSG00000100997	ABHD12	chr20:25228704-25371619	70.0936
ENSG00000082781	ITGB5	chr3:124480794-124620265	70.0906
ENSG00000198715	C1orf85	chr1:156252725-156265463	70.0799
ENSG00000125952	MAX	chr14:65381078-65569413	70.0117
ENSG00000003402	CFLAR	chr2:201980826-202041410	69.9924
ENSG00000103855	CD276	chr15:73976306-74006859	69.952
ENSG00000069424	KCNAB2	chr1:5922870-6161253	69.8869
ENSG00000087116	ADAMTS2	chr5:178537851-178772431	69.7781
ENSG00000003756	RBM5	chr3:49977439-50226508	69.7666
ENSG00000124570	SERPINB6	chr6:2948392-2972090	69.7582
ENSG00000241839	PLEKHO2	chr15:65134081-65251042	69.7579
ENSG00000138760	SCARB2	chr4:77079889-77135046	69.7104
ENSG00000140990	NDUFB10	chr16:2009508-2011976	69.6999
ENSG00000082996	RNF13	chr3:149478891-149942977	69.6719
ENSG00000127528	KLF2	chr19:16435627-16438685	69.651
ENSG00000099817	POLR2E	chr19:1065921-1095598	69.6025
ENSG00000091136	LAMB1	chr7:107531414-107643700	69.5739
ENSG00000136938	ANP32B	chr9:100745642-100778225	69.5639
ENSG00000136527	TRA2B	chr3:185633693-185655924	69.5453
ENSG00000137309	HMGA1	chr6:34204649-34214008	69.3967
ENSG00000137312	FLOT1	chr6:30695485-30710510	69.2535
ENSG00000099783	HNRNPM	chr19:8509650-8553998	69.2093
ENSG00000196576	PLXNB2	chr22:50713407-50746056	69.1649
ENSG00000103496	STX4	chr16:31044209-31054296	69.1546
ENSG00000172725	CORO1B	chr11:67202980-67211292	69.1474
ENSG00000135838	NPL	chr1:182758427-182799519	69.1162
ENSG00000181789	COPG1	chr3:128968448-128996614	69.08
ENSG00000104093	DMXL2	chr15:51706293-51915030	69.0791
ENSG00000198898	CAPZA2	chr7:116451123-116562103	68.9961
ENSG00000169896	ITGAM	chr16:31271310-31344213	68.9762
ENSG00000203879	GDI1	chrX:153665265-153671814	68.8037
ENSG00000084623	EIF3I	chr1:32674694-32697205	68.8003
ENSG00000146701	MDH2	chr7:75677368-75696826	68.8002
ENSG00000159322	ADPGK	chr15:73043709-73090540	68.7863
ENSG00000186298	PPP1CC	chr12:111157484-111180744	68.6412
ENSG00000176973	FAM89B	chr11:65337900-65341669	68.5749
ENSG00000100836	PABPN1	chr14:23654524-23795394	68.5231
ENSG00000198467	TPM2	chr9:35681988-35691017	68.4544
ENSG00000123989	CHPF	chr2:220403668-220415317	68.4027
ENSG00000132963	POMP	chr13:29233240-29253062	68.3393
ENSG00000089351	GRAMD1A	chr19:35485687-35517375	68.3231
ENSG00000078304	PPP2R5C	chr14:102228134-102394326	68.2932
ENSG00000105202	FBL	chr19:40325097-40337054	68.2756
ENSG00000131871	VIMP	chr15:101811021-101817705	68.259
ENSG00000125503	PPP1R12C	chr19:55602280-55628927	68.2317
ENSG00000170142	UBE2E1	chr3:23845514-23932807	68.2098
ENSG00000157191	NECAP2	chr1:16767166-16786573	68.1935
ENSG00000087365	SF3B2	chr11:65818199-65837090	68.1511
ENSG00000160271	RALGDS	chr9:135973106-136039332	68.1084
ENSG00000130313	PGLS	chr19:17579577-17632097	68.0501
ENSG00000116649	SRM	chr1:11114640-11120081	68.0335
ENSG00000105968	H2AFV	chr7:44866389-44887682	68.0021
ENSG00000157020	SEC13	chr3:10289706-10362862	67.9963
ENSG00000170345	FOS	chr14:75745476-75748933	67.9651
ENSG00000021355	SERPINB1	chr6:2832565-2842240	67.8422
ENSG00000067082	KLF6	chr10:3818187-3827473	67.79
ENSG00000161671	EMC10	chr19:50970041-50986608	67.7875
ENSG00000134686	PHC2	chr1:33772366-33896653	67.6285
ENSG00000116260	QSOX1	chr1:180123968-180173165	67.6098
ENSG00000164096	C4orf3	chr4:120218206-120225600	67.5858
ENSG00000069399	BCL3	chr19:45250961-45263301	67.5838
ENSG00000170955	PRKCDBP	chr11:6340175-6341877	67.5614
ENSG00000159176	CSRP1	chr1:201452657-201502736	67.4033
ENSG00000162493	PDPN	chr1:13909959-13944452	67.3926
ENSG00000136867	SLC31A2	chr9:115913221-115983641	67.2952
ENSG00000150459	SAP18	chr13:21714652-21723221	67.2802
ENSG00000189058	APOD	chr3:195295572-195311076	67.1507
ENSG00000224550	RP11-270C12.3	chr1:108047824-108048070	67.1474
ENSG00000134802	SLC43A3	chr11:57154266-57195053	67.0999
ENSG00000044115	CTNNA1	chr5:137946655-138270723	67.0982
ENSG00000103249	CLCN7	chr16:1494934-1525581	67.0494
ENSG00000088448	ANKRD10	chr13:111530886-111567416	67.0344
ENSG00000112576	CCND3	chr6:41902670-42018095	67.0156
ENSG00000163513	TGFBR2	chr3:30647993-30735634	66.9957
ENSG00000015479	MATR3	chr5:138282408-138667360	66.9749
ENSG00000038274	MAT2B	chr5:162930119-162946342	66.9702
ENSG00000272888	AC013394.2	chr15:93425936-93571237	66.8762
ENSG00000159842	ABR	chr17:900356-1132315	66.8596
ENSG00000120963	ZNF706	chr8:102190105-102218421	66.8506
ENSG00000162889	MAPKAPK2	chr1:206858288-206907628	66.8296
ENSG00000165458	INPPL1	chr11:71934744-71956708	66.7832
ENSG00000107796	ACTA2	chr10:90639490-90775542	66.677
ENSG00000072110	ACTN1	chr14:69340859-69446157	66.6469
ENSG00000176014	TUBB6	chr18:12307667-12377313	66.6349
ENSG00000115694	STK25	chr2:242295657-242449145	66.5324
ENSG00000104518	GSDMD	chr8:144635376-144645232	66.5085
ENSG00000213619	NDUFS3	chr11:47487495-47606114	66.4452
ENSG00000140545	MFGE8	chr15:89441915-89456642	66.4242
ENSG00000163660	CCNL1	chr3:156864296-156878549	66.4157
ENSG00000242485	MRPL20	chr1:1334901-1342693	66.3241
ENSG00000010932	FMO1	chr1:171216718-171255117	66.2653
ENSG00000142208	AKT1	chr14:105235685-105262088	66.2511
ENSG00000111481	COPZ1	chr12:54624723-54745633	66.1892
ENSG00000124783	SSR1	chr6:7268538-7418270	66.1762
ENSG00000245848	CEBPA	chr19:33790839-33793470	66.1608
ENSG00000146425	DYNLT1	chr6:159057505-159065771	66.1478
ENSG00000254087	LYN	chr8:56792371-56923940	66.1356
ENSG00000100288	CHKB	chr22:51007289-51052409	66.1341
ENSG00000142798	HSPG2	chr1:22138757-22263790	66.1255
ENSG00000237350	CDC42P6	chr4:22694536-22821198	66.0165
ENSG00000063244	U2AF2	chr19:56165511-56186081	66.0159
ENSG00000135678	CPM	chr12:69201955-69365350	66.0011
ENSG00000173436	MINOS1	chr1:19923472-19984945	65.9583
ENSG00000167123	CERCAM	chr9:131174029-131199626	65.8465
ENSG00000135929	CYP27A1	chr2:219646471-219680016	65.8176
ENSG00000197982	C1orf122	chr1:38268615-38275126	65.7801
ENSG00000140853	NLRC5	chr16:57023396-57117443	65.5444
ENSG00000115234	SNX17	chr2:27593388-27599995	65.5035
ENSG00000142327	RNPEPL1	chr2:241418838-241520789	65.4883
ENSG00000141959	PFKL	chr21:45719933-45747259	65.455
ENSG00000124172	ATP5E	chr20:57594308-57607437	65.4275
ENSG00000130724	CHMP2A	chr19:59062932-59066491	65.2672
ENSG00000129128	SPCS3	chr4:177229418-177253396	65.2603
ENSG00000143570	SLC39A1	chr1:153931574-153950164	65.2099
ENSG00000100453	GZMB	chr14:25064928-25126980	65.1994
ENSG00000091317	CMTM6	chr3:32433162-32544900	65.1214
ENSG00000147274	RBMX	chrX:135923089-135962923	65.0652
ENSG00000184557	SOCS3	chr17:76352863-76356158	65.0554
ENSG00000197102	DYNC1H1	chr14:102430864-102532565	64.9944
ENSG00000198406	BZW1P2	chr3:115521234-117716439	64.9272
ENSG00000102804	TSC22D1	chr13:45007654-45151283	64.9246
ENSG00000173221	GLRX	chr5:95036952-95160087	64.9122
ENSG00000101150	TPD52L2	chr20:62496595-62522898	64.8611
ENSG00000233270	SNRPEP4	chr19:5576670-5576949	64.8026
ENSG00000110031	LPXN	chr11:58294343-58345693	64.7977
ENSG00000115944	COX7A2L	chr2:42560685-42652228	64.7642
ENSG00000235043	TECRP1	chr4:87797357-88062206	64.7196
ENSG00000141551	CSNK1D	chr17:80186272-80231607	64.706
ENSG00000185359	HGS	chr17:79648203-79670330	64.6492
ENSG00000128789	PSMG2	chr18:12438888-12725739	64.6438
ENSG00000220842	RP11-572P18.1	chr10:122114176-122114718	64.581
ENSG00000166333	ILK	chr11:6624871-6633898	64.5441
ENSG00000089053	ANAPC5	chr12:121746047-121837699	64.5201
ENSG00000170027	YWHAG	chr7:75956115-75988348	64.4949
ENSG00000120727	PAIP2	chr5:138677275-138720242	64.494
ENSG00000132205	EMILIN2	chr18:2847027-2915991	64.4812
ENSG00000162736	NCSTN	chr1:160259062-160328742	64.434
ENSG00000129351	ILF3	chr19:10764936-10803093	64.2803
ENSG00000257073	AC011933.1	chr17:73314156-73401790	64.2507
ENSG00000108424	KPNB1	chr17:45726841-45762871	64.1367
ENSG00000173762	CD7	chr17:80272743-80275478	64.1228
ENSG00000103275	UBE2I	chr16:1355547-1377019	64.1079
ENSG00000156234	CXCL13	chr4:78432906-78532988	64.0975
ENSG00000149483	TMEM138	chr11:61066922-61136981	64.0427
ENSG00000014216	CAPN1	chr11:64945076-64979477	64.0137
ENSG00000189171	S100A13	chr1:153591262-153618782	63.9965
ENSG00000128699	ORMDL1	chr2:190635048-190649097	63.9896
ENSG00000143545	RAB13	chr1:153954126-153958834	63.9146
ENSG00000184584	TMEM173	chr5:138855118-138862520	63.8122
ENSG00000245910	SNHG6	chr8:67782983-67838633	63.7719
ENSG00000196498	NCOR2	chr12:124808960-125052135	63.7683
ENSG00000026950	BTN3A1	chr6:26402464-26415444	63.6053
ENSG00000197405	C5AR1	chr19:47793279-47825323	63.565
ENSG00000198355	PIM3	chr22:50354160-50357728	63.5331
ENSG00000161638	ITGA5	chr12:54747444-54891472	63.518
ENSG00000118503	TNFAIP3	chr6:138144809-138204449	63.5179
ENSG00000183087	GAS6	chr13:114518602-114567046	63.4997
ENSG00000130830	MPP1	chrX:154006958-154049282	63.4584
ENSG00000131100	ATP6V1E1	chr22:18074901-18111584	63.3899
ENSG00000120885	CLU	chr8:27454433-27472548	63.3608
ENSG00000116586	LAMTOR2	chr1:156024542-156028301	63.3215
ENSG00000105677	TMEM147	chr19:36024313-36038428	63.2949
ENSG00000160888	IER2	chr19:13261228-13265722	63.2365
ENSG00000129625	REEP5	chr5:112043194-112258236	63.2284
ENSG00000172061	LRRC15	chr3:194075975-194090472	63.2119
ENSG00000095139	ARCN1	chr11:118307204-118473748	63.1868
ENSG00000140379	BCL2A1	chr15:80253230-80263788	63.1668
ENSG00000175602	CCDC85B	chr11:65657874-65659105	63.1032
ENSG00000122786	CALD1	chr7:134429002-134655479	63.1006
ENSG00000109180	OCIAD1	chr4:48807228-48863834	63.0893
ENSG00000101361	NOP56	chr20:2632790-2639039	63.0871
ENSG00000115204	MPV17	chr2:27532359-27548547	63.0676
ENSG00000112473	SLC39A7	chr6:33161364-33172216	63.0403
ENSG00000159346	ADIPOR1	chr1:202909950-202927700	63.0338
ENSG00000180304	OAZ2	chr15:64979771-65011801	62.9295
ENSG00000133574	GIMAP4	chr7:150264364-150271041	62.8963
ENSG00000160710	ADAR	chr1:154554537-154600475	62.8805
ENSG00000175756	AURKAIP1	chr1:1309109-1310875	62.8465
ENSG00000173486	FKBP2	chr11:64008474-64011604	62.7927
ENSG00000168056	LTBP3	chr11:65306275-65326401	62.6666
ENSG00000086061	DNAJA1	chr9:33025208-33039905	62.482
ENSG00000120948	TARDBP	chr1:11072413-11085796	62.443
ENSG00000130489	SCO2	chr22:50961996-50971009	62.4082
ENSG00000133318	RTN3	chr11:63448917-63527363	62.3918
ENSG00000160410	SHKBP1	chr19:41082756-41097305	62.3549
ENSG00000137497	NUMA1	chr11:71709586-71823826	62.3329
ENSG00000099785	MARCH2	chr19:8478153-8503901	62.3247
ENSG00000184752	NDUFA12	chr12:95290830-95397546	62.3204
ENSG00000143621	ILF2	chr1:153634511-153643524	62.2546
ENSG00000104979	C19orf53	chr19:13875345-13889276	62.2037
ENSG00000167815	PRDX2	chr19:12873816-12985765	62.1797
ENSG00000135624	CCT7	chr2:73460547-73480149	62.1244
ENSG00000101199	ARFGAP1	chr20:61904136-61921142	62.1084
ENSG00000197157	SND1	chr7:127292233-127732661	62.1021
ENSG00000130520	LSM4	chr19:18417039-18434084	62.0966
ENSG00000177879	AP3S1	chr5:115163892-115249778	62.0509
ENSG00000121858	TNFSF10	chr3:172223297-172241297	62.0476
ENSG00000066322	ELOVL1	chr1:43829067-43833696	62.0381
ENSG00000153113	CAST	chr5:95220801-96143803	62.0175
ENSG00000119185	ITGB1BP1	chr2:9346893-9563676	61.9431
ENSG00000113721	PDGFRB	chr5:149493399-149535435	61.9003
ENSG00000164125	FAM198B	chr4:159045625-159176563	61.844
ENSG00000122122	SASH3	chrX:128913954-128930939	61.8338
ENSG00000226415	TPI1P1	chr1:77165473-77166223	61.8316
ENSG00000078098	FAP	chr2:163016271-163101661	61.7252
ENSG00000071626	DAZAP1	chr19:1407567-1435719	61.6416
ENSG00000124155	PIGT	chr20:44044716-44054884	61.5952
ENSG00000132965	ALOX5AP	chr13:31309644-31338556	61.5912
ENSG00000143106	PSMA5	chr1:109941652-109969062	61.5632
ENSG00000226976	COX6A1P2	chr6:37012606-37013177	61.5343
ENSG00000177666	PNPLA2	chr11:818901-842545	61.4322
ENSG00000146094	DOK3	chr5:176910394-176938275	61.4287
ENSG00000269893	SNHG8	chr4:119199863-119200978	61.2402
ENSG00000132424	PNISR	chr6:99845926-99879249	61.1125
ENSG00000146386	ABRACL	chr6:139349818-139364439	61.0969
ENSG00000119383	PPP2R4	chr9:131857088-131911225	61.0116
ENSG00000127483	HP1BP3	chr1:21069153-21113816	60.9766
ENSG00000156261	CCT8	chr21:30428125-30446118	60.9129
ENSG00000119048	UBE2B	chr5:133706869-133727683	60.8684
ENSG00000119801	YPEL5	chr2:30369806-30383399	60.8647
ENSG00000136930	PSMB7	chr9:127115744-127177723	60.8514
ENSG00000013306	SLC25A39	chr17:42396992-42402238	60.8463
ENSG00000127922	SHFM1	chr7:96110937-96339203	60.8271
ENSG00000171530	TBCA	chr5:76986990-77164604	60.7929
ENSG00000213866	YBX1P10	chr9:35971340-35972315	60.792
ENSG00000196329	GIMAP5	chr7:150413644-150487837	60.7896
ENSG00000135387	CAPRIN1	chr11:34073229-34122703	60.7884
ENSG00000139679	LPAR6	chr13:48877886-49056122	60.6995
ENSG00000131724	IL13RA1	chrX:117861534-117928502	60.6892
ENSG00000197858	GPAA1	chr8:145137492-145141119	60.6734
ENSG00000179091	CYC1	chr8:145149929-145152428	60.6719
ENSG00000134294	SLC38A2	chr12:46751971-46767561	60.5999
ENSG00000062485	CS	chr12:56665482-56727837	60.5941
ENSG00000167986	DDB1	chr11:61066922-61136981	60.5852
ENSG00000137207	YIPF3	chr6:43474706-43543812	60.454
ENSG00000169180	XPO6	chr16:28109299-28223241	60.448
ENSG00000134954	ETS1	chr11:128328655-128457453	60.4209
ENSG00000110717	NDUFS8	chr11:67798083-67804111	60.3924
ENSG00000168918	INPP5D	chr2:233924676-234116549	60.3724
ENSG00000143013	LMO4	chr1:87794150-87814606	60.3541
ENSG00000185262	UBALD2	chr17:74261282-74267375	60.3405
ENSG00000120896	SORBS3	chr8:22298331-22433301	60.3104
ENSG00000168610	STAT3	chr17:40465341-40540586	60.2861
ENSG00000162368	CMPK1	chr1:47799468-47844511	60.2468
ENSG00000214022	REPIN1	chr7:150060865-150109558	60.228
ENSG00000115762	PLEKHB2	chr2:131862419-132111282	60.2168
ENSG00000100567	PSMA3	chr14:58466452-58764857	60.0683
ENSG00000153551	CMTM7	chr3:32433162-32544900	59.9872
ENSG00000109610	SOD3	chr4:24791533-24802464	59.9724
ENSG00000115461	IGFBP5	chr2:217536827-217858802	59.9477
ENSG00000213445	SIPA1	chr11:65405567-65418401	59.819
ENSG00000122515	ZMIZ2	chr7:44788179-44809477	59.796
ENSG00000103335	PIEZO1	chr16:88772870-88851619	59.7514
ENSG00000126934	MAP2K2	chr19:4090318-4124126	59.7404
ENSG00000131203	IDO1	chr8:39759793-39873910	59.7242
ENSG00000138821	SLC39A8	chr4:103172197-103371167	59.6648
ENSG00000182179	UBA7	chr3:49842639-49851379	59.6489
ENSG00000089006	SNX5	chr20:17922240-18039832	59.5483
ENSG00000100258	LMF2	chr22:50941375-50946135	59.4903
ENSG00000067066	SP100	chr2:231280656-231444721	59.3618
ENSG00000149823	VPS51	chr11:64851694-64883856	59.3588
ENSG00000134910	STT3A	chr11:125439111-125551018	59.3571
ENSG00000159352	PSMD4	chr1:151227178-151239955	59.3512
ENSG00000188229	TUBB4B	chr9:140135664-140142222	59.3436
ENSG00000146457	WTAP	chr6:160090088-160210781	59.2813
ENSG00000150753	CCT5	chr5:10250032-10267258	59.2613
ENSG00000148362	C9orf142	chr9:139886869-139888436	59.2403
ENSG00000163956	LRPAP1	chr4:3508102-3534286	59.1654
ENSG00000189159	HN1	chr17:73131342-73179078	59.0907
ENSG00000060718	COL11A1	chr1:103342022-103574052	59.0381
ENSG00000167578	RAB4B	chr19:41277552-41406413	59.0033
ENSG00000206341	HLA-H	chr6:29855070-29858259	58.9928
ENSG00000072694	FCGR2B	chr1:161475219-161648444	58.8972
ENSG00000160691	SHC1	chr1:154929501-154946871	58.8692
ENSG00000188042	ARL4C	chr2:235401684-235405697	58.8532
ENSG00000180581	SRP9P1	chr10:93558068-93625033	58.7957
ENSG00000085265	FCN1	chr9:137801430-137809809	58.7252
ENSG00000169718	DUS1L	chr17:80015381-80023763	58.7104
ENSG00000142864	SERBP1	chr1:67873492-67896098	58.6648
ENSG00000065882	TBC1D1	chr4:37892707-38140796	58.5969
ENSG00000134440	NARS	chr18:55267887-55289445	58.5527
ENSG00000087191	PSMC5	chr17:61896792-61909379	58.5029
ENSG00000167543	TP53I13	chr17:27887564-28513493	58.4859
ENSG00000119535	CSF3R	chr1:36931643-36948879	58.4468
ENSG00000185043	CIB1	chr15:90773206-90785315	58.4375
ENSG00000103502	CDIPT	chr16:29869677-29879371	58.382
ENSG00000145337	PYURF	chr4:89442135-89629693	58.2995
ENSG00000121774	KHDRBS1	chr1:32479429-32568467	58.2911
ENSG00000160075	SSU72	chr1:1477052-1510249	58.2484
ENSG00000109736	MFSD10	chr4:2932287-2936586	58.2029
ENSG00000101474	APMAP	chr20:24943560-24973615	58.1997
ENSG00000005844	ITGAL	chr16:30483978-30534506	58.1786
ENSG00000116824	CD2	chr1:117297006-117311850	58.1335
ENSG00000082153	BZW1	chr2:201542955-201688569	58.0747
ENSG00000182054	IDH2	chr15:90626276-90645736	58.032
ENSG00000174231	PRPF8	chr17:1553922-1588176	58.0008
ENSG00000198843	SELT	chr3:150259780-150348222	57.9711
ENSG00000185475	TMEM179B	chr11:62538591-62559493	57.9699
ENSG00000102962	CCL22	chr16:57392683-57400102	57.9585
ENSG00000243199	RP11-408P14.1	chr4:66185280-66563747	57.911
ENSG00000128951	DUT	chr15:48604549-48635570	57.8529
ENSG00000173559	NABP1	chr2:192542793-192561385	57.8493
ENSG00000130706	ADRM1	chr20:60877148-60942368	57.8175
ENSG00000123329	ARHGAP9	chr12:57853917-57914300	57.8039
ENSG00000100138	NHP2L1	chr22:42069933-42094140	57.7875
ENSG00000082397	EPB41L3	chr18:5392382-5630699	57.7494
ENSG00000129187	DCTD	chr4:183811212-183839089	57.7283
ENSG00000126456	IRF3	chr19:50162825-50177173	57.6878
ENSG00000172724	CCL19	chr9:34689563-34691274	57.6778
ENSG00000185627	PSMD13	chr11:215457-252983	57.6415
ENSG00000110876	SELPLG	chr12:109015685-109035094	57.5927
ENSG00000162191	UBXN1	chr11:62443969-62446567	57.4956
ENSG00000077984	CST7	chr20:24929865-24940564	57.4553
ENSG00000135446	CDK4	chr12:58117543-58154190	57.45
ENSG00000108523	RNF167	chr17:4840424-4848517	57.4397
ENSG00000004779	NDUFAB1	chr16:23592322-23607677	57.4012
ENSG00000065911	MTHFD2	chr2:74425688-74621009	57.3901
ENSG00000116044	NFE2L2	chr2:178092322-178408564	57.3788
ENSG00000129038	LOXL1	chr15:74200423-74244478	57.3701
ENSG00000138029	HADHB	chr2:26413503-26513336	57.2124
ENSG00000225663	FAM195B	chr17:79780286-79791178	57.1691
ENSG00000170776	AKAP13	chr15:85923801-86293512	57.1456
ENSG00000175463	TBC1D10C	chr11:67159175-67193078	57.0053
ENSG00000182154	MRPL41	chr9:140445650-140447007	56.9813
ENSG00000072135	PTPN18	chr2:131113579-131132982	56.955
ENSG00000233954	RP11-169K16.7	chr1:16133678-16134194	56.9421
ENSG00000143222	UFC1	chr1:161122565-161129139	56.8713
ENSG00000147443	DOK2	chr8:21766383-21771371	56.804
ENSG00000142694	EVA1B	chr1:36771987-36794822	56.7909
ENSG00000156471	PTDSS1	chr8:97273942-97349223	56.7905
ENSG00000141503	MINK1	chr17:4736682-4806369	56.7453
ENSG00000155660	PDIA4	chr7:148700153-148725733	56.7434
ENSG00000175130	MARCKSL1	chr1:32799432-32801980	56.7282
ENSG00000166557	TMED3	chr15:79603403-79704334	56.6737
ENSG00000101220	C20orf27	chr20:3734154-3749034	56.6262
ENSG00000101367	MAPRE1	chr20:31407698-31442063	56.6094
ENSG00000117519	CNN3	chr1:95362506-95392834	56.5872
ENSG00000180817	PPA1	chr10:71962585-71993667	56.5382
ENSG00000154589	LY96	chr8:74903586-74941322	56.5297
ENSG00000065427	KARS	chr16:75661621-75795770	56.4919
ENSG00000196235	SUPT5H	chr19:39926795-39967310	56.4764
ENSG00000136205	TNS3	chr7:47314751-47622156	56.4729
ENSG00000164346	NSA2	chr5:73923233-74072737	56.466
ENSG00000115286	NDUFS7	chr19:1383525-1396466	56.4359
ENSG00000100225	FBXO7	chr22:32870662-32894818	56.4267
ENSG00000137161	CNPY3	chr6:42896937-42907025	56.3779
ENSG00000123338	NCKAP1L	chr12:54891494-54937889	56.3646
ENSG00000179262	RAD23A	chr19:13056668-13064456	56.3638
ENSG00000068793	CYFIP1	chr15:22892004-23034427	56.3428
ENSG00000136732	GYPC	chr2:127413508-127454246	56.2715
ENSG00000084636	COL16A1	chr1:32083286-32169920	56.2293
ENSG00000139641	ESYT1	chr12:56511942-56538455	56.2257
ENSG00000120438	TCP1	chr6:160090088-160210781	56.1974
ENSG00000196776	CD47	chr3:107762144-107809872	56.1944
ENSG00000084733	RAB10	chr2:26256975-26360323	56.1131
ENSG00000141552	ANAPC11	chr17:79845712-79869340	56.0529
ENSG00000171222	SCAND1	chr20:34541538-34547394	55.9909
ENSG00000111269	CREBL2	chr12:12764760-12798042	55.9628
ENSG00000081154	PCNP	chr3:101292938-101313281	55.9428
ENSG00000125844	RRBP1	chr20:17594322-17662940	55.9201
ENSG00000215492	HNRNPA1P7	chr18:29598334-30050447	55.9
ENSG00000150540	HNMT	chr2:138721589-138773930	55.8794
ENSG00000108219	TSPAN14	chr10:82213921-82295698	55.8611
ENSG00000155254	MARVELD1	chr10:99472929-99477907	55.8496
ENSG00000084090	STARD7	chr2:96850596-96908359	55.8364
ENSG00000092531	SNAP23	chr15:42783430-42841000	55.8319
ENSG00000179051	RCC2	chr1:17733255-17766220	55.8189
ENSG00000115128	SF3B14	chr2:24290453-24299313	55.8006
ENSG00000022840	RNF10	chr12:120941076-121015397	55.7424
ENSG00000112697	TMEM30A	chr6:75962639-75994684	55.6324
ENSG00000124562	SNRPC	chr6:34725182-34741571	55.5876
ENSG00000159202	UBE2Z	chr17:46952221-47006418	55.572
ENSG00000130985	UBA1	chrX:47050259-47074527	55.565
ENSG00000084754	HADHA	chr2:26413503-26513336	55.5541
ENSG00000162430	SEPN1	chr1:26126666-26185903	55.5411
ENSG00000128463	EMC4	chr15:34517199-34522357	55.532
ENSG00000166002	SMCO4	chr11:93211637-93276674	55.5229
ENSG00000100299	ARSA	chr22:51061181-51066607	55.4863
ENSG00000172638	EFEMP2	chr11:65590492-65641063	55.4678
ENSG00000116679	IVNS1ABP	chr1:185265519-185286461	55.441
ENSG00000185187	SIGIRR	chr11:405715-417455	55.4256
ENSG00000100280	AP1B1	chr22:29723668-29819182	55.3865
ENSG00000176731	C8orf59	chr8:86089459-86132650	55.3637
ENSG00000055070	SZRD1	chr1:16679069-16763919	55.3504
ENSG00000223953	C1QTNF5	chr11:119209651-119217383	55.317
ENSG00000117118	SDHB	chr1:17345216-17380665	55.315
ENSG00000112977	DAP	chr5:10679341-10770406	55.2858
ENSG00000111639	MRPL51	chr12:6601149-6641121	55.272
ENSG00000137673	MMP7	chr11:102391238-102401484	55.262
ENSG00000188313	PLSCR1	chr3:146232966-146262651	55.2498
ENSG00000145050	MANF	chr3:51422477-51426828	55.1064
ENSG00000149923	PPP4C	chr16:30087298-30096698	55.0979
ENSG00000113013	HSPA9	chr5:137890570-137911133	55.0899
ENSG00000174851	YIF1A	chr11:66036003-66056641	55.0831
ENSG00000077585	GPR137B	chr1:236305831-236445319	55.0059
ENSG00000174718	KIAA1551	chr12:32112303-32146039	54.9795
ENSG00000215301	DDX3X	chrX:41192650-41223725	54.9555
ENSG00000106028	SSBP1	chr7:141404137-141488440	54.922
ENSG00000171552	BCL2L1	chr20:30252254-30311792	54.9049
ENSG00000126457	PRMT1	chr19:50179042-50193832	54.9018
ENSG00000134287	ARF3	chr12:49297200-49351334	54.8482
ENSG00000100100	PIK3IP1	chr22:31677578-31742218	54.8384
ENSG00000179632	MAF1	chr8:145153535-145173218	54.7881
ENSG00000108561	C1QBP	chr17:5185557-5372380	54.7682
ENSG00000177606	JUN	chr1:59246464-59249785	54.747
ENSG00000105472	CLEC11A	chr19:51226585-51228974	54.6868
ENSG00000172936	MYD88	chr3:38179968-38184513	54.6592
ENSG00000023734	STRAP	chr12:16035324-16056412	54.6474
ENSG00000169756	LIMS1	chr2:109150856-109303702	54.6154
ENSG00000146731	CCT6A	chr7:56119322-56131682	54.6047
ENSG00000073849	ST6GAL1	chr3:186648273-186796341	54.6014
ENSG00000104853	CLPTM1	chr19:45457841-45496599	54.5375
ENSG00000164104	HMGB2	chr4:174252845-174256276	54.4481
ENSG00000125734	GPR108	chr19:6677714-6737614	54.3808
ENSG00000108950	FAM20A	chr17:66255322-66760023	54.3573
ENSG00000130312	MRPL34	chr19:17402939-17445638	54.353
ENSG00000115541	HSPE1	chr2:198351304-198418423	54.3344
ENSG00000188643	S100A16	chr1:153579361-153585621	54.2995
ENSG00000243449	C4orf48	chr4:2043688-2045697	54.294
ENSG00000125826	RBCK1	chr20:388141-411610	54.2232
ENSG00000166295	ANAPC16	chr10:73856277-73995618	54.2104
ENSG00000131504	DIAPH1	chr5:140894582-141016437	54.201
ENSG00000008130	NADK	chr1:1682670-1711896	54.1986
ENSG00000205155	PSENEN	chr19:36230057-36245420	54.158
ENSG00000234741	GAS5	chr1:173832385-173872687	54.072
ENSG00000059804	SLC2A3	chr12:8071825-8088871	54.066
ENSG00000104325	DECR1	chr8:90945563-91064320	54.0488
ENSG00000249915	PDCD6	chr5:271735-438406	54.0248
ENSG00000049449	RCN1	chr11:31806339-32127301	54.0008
ENSG00000234036	TXNP6	chr4:77870855-77961537	53.9248
ENSG00000156171	DRAM2	chr1:111659954-111727724	53.9153
ENSG00000140564	FURIN	chr15:91411821-91426688	53.8953
ENSG00000125144	MT1G	chr16:56700642-56701977	53.8587
ENSG00000010810	FYN	chr6:111981534-112194655	53.8434
ENSG00000108819	PPP1R9B	chr17:48211103-48227991	53.7778
ENSG00000173209	AHSA2	chr2:61404552-61697904	53.7777
ENSG00000103202	NME4	chr16:446724-462487	53.7643
ENSG00000174437	ATP2A2	chr12:110718560-110788898	53.7496
ENSG00000204136	GGTA1P	chr9:124137518-124262306	53.7387
ENSG00000169604	ANTXR1	chr2:69240309-69476459	53.7382
ENSG00000224578	HNRNPA1P48	chr16:51679666-51681043	53.6877
ENSG00000204822	MRPL53	chr2:74699084-74722013	53.6613
ENSG00000218227	RP11-889L3.1	chr5:177482604-177483195	53.6309
ENSG00000096746	HNRNPH3	chr10:70042416-70167051	53.61
ENSG00000243147	MRPL33	chr2:27994583-28561768	53.6062
ENSG00000198858	R3HDM4	chr19:896502-913240	53.5899
ENSG00000113088	GZMK	chr5:54273691-54338672	53.5696
ENSG00000078618	NRD1	chr1:52027537-52344477	53.5197
ENSG00000141759	TXNL4A	chr18:77732866-77793949	53.488
ENSG00000197965	MPZL1	chr1:167690428-167761156	53.4848
ENSG00000196396	PTPN1	chr20:49126890-49201299	53.4802
ENSG00000224861	YBX1P1	chr14:66479547-66480507	53.4569
ENSG00000012660	ELOVL5	chr6:53132195-53213947	53.4391
ENSG00000132676	DAP3	chr1:155579566-155829191	53.4005
ENSG00000108179	PPIF	chr10:81107224-81115093	53.3879
ENSG00000160201	U2AF1	chr21:44513065-44527697	53.3519
ENSG00000214655	ZSWIM8	chr10:75545339-75571589	53.2948
ENSG00000159199	ATP5G1	chr17:46952221-47006418	53.283
ENSG00000213058	RP4-765C7.2	chr1:178060642-178448644	53.2679
ENSG00000127603	MACF1	chr1:39546987-39952849	53.254
ENSG00000160752	FDPS	chr1:155278538-155300905	53.2358
ENSG00000168685	IL7R	chr5:35852796-35879705	53.2132
ENSG00000127481	UBR4	chr1:19398603-19536770	53.1714
ENSG00000100055	CYTH4	chr22:37678067-37711382	53.1566
ENSG00000154978	VOPP1	chr7:55503748-55640681	53.1489
ENSG00000100342	APOL1	chr22:36649055-36663576	53.1067
ENSG00000109390	NDUFC1	chr4:140187316-140397763	53.097
ENSG00000176170	SPHK1	chr17:74305566-74383941	53.0154
ENSG00000074370	ATP2A3	chr17:3827168-3867736	52.9675
ENSG00000126214	KLC1	chr14:104019757-104181841	52.9343
ENSG00000136250	AOAH	chr7:36552455-36764154	52.895
ENSG00000127838	PNKD	chr2:219135114-219232822	52.8716
ENSG00000126458	RRAS	chr19:50138548-50143458	52.86
ENSG00000178950	GAK	chr4:843063-926161	52.8559
ENSG00000064961	HMG20B	chr19:3506270-3579086	52.8136
ENSG00000105355	PLIN3	chr19:4838343-4867780	52.7864
ENSG00000169764	UGP2	chr2:64068073-64118696	52.7307
ENSG00000185909	KLHDC8B	chr3:49209043-49213917	52.705
ENSG00000134153	EMC7	chr15:34376217-34394149	52.7008
ENSG00000160310	PRMT2	chr21:48055078-48085036	52.6959
ENSG00000087087	SRRT	chr7:100472732-100486285	52.6947
ENSG00000139684	ESD	chr13:47345390-47371367	52.6526
ENSG00000132514	CLEC10A	chr17:6977855-6983626	52.6052
ENSG00000171720	HDAC3	chr5:140894582-141016437	52.6011
ENSG00000137193	PIM1	chr6:37137978-37143202	52.5692
ENSG00000178127	NDUFV2	chr18:9102627-9285983	52.4892
ENSG00000135596	MICAL1	chr6:109765264-109804440	52.4755
ENSG00000136026	CKAP4	chr12:106631654-106740793	52.4269
ENSG00000172115	CYCS	chr7:25159709-25164980	52.4262
ENSG00000177576	C18orf32	chr18:47008027-47018906	52.425
ENSG00000109920	FNBP4	chr11:47738071-47788995	52.4045
ENSG00000162434	JAK1	chr1:65210777-65432187	52.329
ENSG00000226360	RPL10AP6	chr3:61547242-62355005	52.3237
ENSG00000103024	NME3	chr16:1756183-1821731	52.3224
ENSG00000115594	IL1R1	chr2:102681003-102798568	52.3153
ENSG00000077782	FGFR1	chr8:38268655-38326352	52.2882
ENSG00000080822	CLDND1	chr3:98216447-98312567	52.2652
ENSG00000136147	PHF11	chr13:50069745-50103123	52.2622
ENSG00000127947	PTPN12	chr7:77166591-77269388	52.2612
ENSG00000105700	KXD1	chr19:18668571-18680197	52.2
ENSG00000169926	KLF13	chr15:31619057-31727868	52.1935
ENSG00000125520	SLC2A4RG	chr20:62289162-62374858	52.1779
ENSG00000134108	ARL8B	chr3:5163904-5229014	52.1547
ENSG00000247774	PCED1B-AS1	chr12:47469489-47630443	52.1292
ENSG00000136830	FAM129B	chr9:130267617-130341268	52.0809
ENSG00000168002	POLR2G	chr11:62529015-62534182	52.0263
ENSG00000132716	DCAF8	chr1:160185504-160256138	52.0233
ENSG00000239697	TNFSF12	chr17:7452207-7464925	52.0147
ENSG00000159210	SNF8	chr17:47006677-47022479	52.0131
ENSG00000144224	UBXN4	chr2:136499188-136542625	51.9993
ENSG00000125944	HNRNPR	chr1:23630263-23670829	51.9853
ENSG00000197226	TBC1D9B	chr5:179224596-179334859	51.9213
ENSG00000269858	EGLN2	chr19:41277552-41406413	51.8808
ENSG00000156738	MS4A1	chr11:60223224-60238233	51.8105
ENSG00000157637	SLC38A10	chr17:79218799-79269347	51.8048
ENSG00000179583	CIITA	chr16:10958770-11036878	51.7574
ENSG00000087266	SH3BP2	chr4:2794749-2842825	51.7082
ENSG00000205937	RNPS1	chr16:2303116-2323419	51.7034
ENSG00000198408	MGEA5	chr10:103544199-103578696	51.6981
ENSG00000107819	SFXN3	chr10:102790990-102800998	51.6754
ENSG00000169554	ZEB2	chr2:145141647-145282147	51.6673
ENSG00000138031	ADCY3	chr2:25012602-25142708	51.6571
ENSG00000116584	ARHGEF2	chr1:155916629-155976861	51.6562
ENSG00000126005	MMP24-AS1	chr20:33703166-33872788	51.6272
ENSG00000236801	RPL24P8	chr9:72658496-72873782	51.622
ENSG00000163563	MNDA	chr1:158801106-158819296	51.533
ENSG00000132530	XAF1	chr17:6658765-6678966	51.5261
ENSG00000223380	SEC22B	chr1:145096219-145116922	51.5181
ENSG00000119705	SLIRP	chr14:78174413-78236085	51.4745
ENSG00000105058	FAM32A	chr19:16296190-16302857	51.4703
ENSG00000106588	PSMA2	chr7:42948324-42988557	51.4577
ENSG00000147123	NDUFB11	chrX:47001614-47046212	51.4211
ENSG00000129968	ABHD17A	chr19:1876808-1885546	51.3705
ENSG00000182952	HMGN4	chr6:26538632-26546482	51.3518
ENSG00000124299	PEPD	chr19:33877855-34012700	51.3331
ENSG00000163527	STT3B	chr3:31574129-31679112	51.324
ENSG00000082641	NFE2L1	chr17:46125690-46138849	51.2701
ENSG00000242372	EIF6	chr20:33703166-33872788	51.2635
ENSG00000101825	MXRA5	chrX:3226605-3264682	51.2385
ENSG00000179134	SAMD4B	chr19:39833035-39876350	51.073
ENSG00000047849	MAP4	chr3:47892181-48130769	51.0243
ENSG00000131495	NDUFA2	chr5:140018324-140042064	51.0089
ENSG00000167895	TMC8	chr17:76000248-76139049	50.9836
ENSG00000079215	SLC1A3	chr5:36606456-36725297	50.9319
ENSG00000138600	SPPL2A	chr15:50999505-51058005	50.9232
ENSG00000138413	IDH1	chr2:209100950-209130798	50.915
ENSG00000144381	HSPD1	chr2:198351304-198418423	50.8971
ENSG00000116350	SRSF4	chr1:29474254-29508499	50.8816
ENSG00000100385	IL2RB	chr22:37521877-37595425	50.8735
ENSG00000131508	UBE2D2	chr5:138906015-139008018	50.8542
ENSG00000133275	CSNK1G2	chr19:1941187-1981337	50.8059
ENSG00000144028	SNRNP200	chr2:96940073-96971297	50.7769
ENSG00000010295	IFFO1	chr12:6647540-6665239	50.7517
ENSG00000169919	GUSB	chr7:65425670-65447301	50.7289
ENSG00000205531	NAP1L4	chr11:2965666-3013607	50.6797
ENSG00000187051	RPS19BP1	chr22:39925097-39928860	50.6714
ENSG00000243317	C7orf73	chr7:135347243-135433594	50.6475
ENSG00000099875	MKNK2	chr19:2037469-2051243	50.6412
ENSG00000083444	PLOD1	chr1:11994261-12035595	50.6293
ENSG00000089159	PXN	chr12:120639093-120703574	50.6173
ENSG00000099250	NRP1	chr10:33466419-33625190	50.6132
ENSG00000107263	RAPGEF1	chr9:134452156-134615461	50.5964
ENSG00000160209	PDXK	chr21:45138974-45182188	50.5922
ENSG00000232346	SC22CB-1E7.1	chr22:32435476-32435883	50.5837
ENSG00000162777	DENND2D	chr1:111729795-111786062	50.564
ENSG00000140511	HAPLN3	chr15:89420518-89438857	50.537
ENSG00000078668	VDAC3	chr8:42249141-42263415	50.4468
ENSG00000227671	MIR3916	chr1:247353152-247405125	50.391
ENSG00000168701	TMEM208	chr16:67261005-67263181	50.3665
ENSG00000127314	RAP1B	chr12:69004618-69054372	50.3529
ENSG00000227063	RPL41P1	chr20:21735865-21736171	50.3166
ENSG00000112667	DNPH1	chr6:43193366-43197222	50.2504
ENSG00000137496	IL18BP	chr11:71709586-71823826	50.2489
ENSG00000060762	MPC1	chr6:166778406-166796486	50.2278
ENSG00000129255	MPDU1	chr17:7465191-7536700	50.2172
ENSG00000100528	CNIH1	chr14:54893653-54908149	50.2095
ENSG00000075618	FSCN1	chr7:5632438-5646286	50.1812
ENSG00000102898	NUTF2	chr16:67840667-67906470	50.1553
ENSG00000102393	GLA	chrX:100645811-100669121	50.1359
ENSG00000164548	TRA2A	chr7:23544398-23571660	50.0886
ENSG00000173391	OLR1	chr12:10310901-10344400	50.0604
ENSG00000161013	MGAT4B	chr5:179224596-179334859	50.054
ENSG00000179144	GIMAP7	chr7:150211917-150218161	50.0204
ENSG00000090013	BLVRB	chr19:40953695-40971747	49.9995
ENSG00000262246	CORO7	chr16:4364761-4475706	49.9753
ENSG00000119013	NDUFB3	chr2:201773695-201950473	49.9579
ENSG00000198189	HSD17B11	chr4:88224940-88312538	49.9393
ENSG00000063245	EPN1	chr19:56186591-56249768	49.8719
ENSG00000163584	RPL22L1	chr3:170582663-170588272	49.8583
ENSG00000059378	PARP12	chr7:139723543-139763521	49.8433
ENSG00000126088	UROD	chr1:45477818-45481247	49.8337
ENSG00000175220	ARHGAP1	chr11:46698629-46722165	49.8279
ENSG00000258227	CLEC5A	chr7:141607612-141806547	49.8119
ENSG00000184371	CSF1	chr1:110452863-110473614	49.7537
ENSG00000172543	CTSW	chr11:65647279-65656010	49.6653
ENSG00000112531	QKI	chr6:163835031-163999628	49.6523
ENSG00000140299	BNIP2	chr15:59887073-59981733	49.6168
ENSG00000141429	GALNT1	chr18:33161080-33291798	49.6127
ENSG00000162654	GBP4	chr1:89646830-89664615	49.592
ENSG00000166925	TSC22D4	chr7:100054237-100076902	49.582
ENSG00000059377	TBXAS1	chr7:139246315-139720125	49.5469
ENSG00000128228	SDF2L1	chr22:21996549-21998587	49.5468
ENSG00000224041	IGKV3D-15	chr2:90153695-90154258	49.4608
ENSG00000144136	SLC20A1	chr2:113403433-113421404	49.4426
ENSG00000103043	VAC14	chr16:70721341-70835064	49.4316
ENSG00000136048	DRAM1	chr12:102271128-102405908	49.4208
ENSG00000145730	PAM	chr5:102089684-102366809	49.341
ENSG00000131042	LILRB2	chr19:54777674-54785039	49.2879
ENSG00000137331	IER3	chr6:30710705-30712331	49.2836
ENSG00000148484	RSU1	chr10:16632609-16859527	49.2813
ENSG00000197006	METTL9	chr16:21608538-21668794	49.2562
ENSG00000170638	TRABD	chr22:50624343-50638976	49.2493
ENSG00000235957	COX7CP1	chr13:49550047-49783915	49.2136
ENSG00000165457	FOLR2	chr11:71927644-71932994	49.2129
ENSG00000179820	MYADM	chr19:54357834-54379691	49.2023
ENSG00000100612	DHRS7	chr14:60558628-60636574	49.1574
ENSG00000232388	LINC00493	chr20:18548063-18550207	49.1081
ENSG00000159592	GPBP1L1	chr1:46092975-46216322	49.1023
ENSG00000032444	PNPLA6	chr19:7587511-7626650	49.0738
ENSG00000135077	HAVCR2	chr5:156512842-156682201	49.058
ENSG00000127125	PPCS	chr1:42895999-43120335	49.0497
ENSG00000167642	SPINT2	chr19:38734674-38795649	49.0474
ENSG00000126581	BECN1	chr17:40950809-40995774	49.0205
ENSG00000150594	ADRA2A	chr10:112836789-112840658	48.9864
ENSG00000114013	CD86	chr3:121774212-121839983	48.9843
ENSG00000135930	EIF4E2	chr2:233412778-233547491	48.9698
ENSG00000204469	PRRC2A	chr6:31588496-31605548	48.9418
ENSG00000243927	MRPS6	chr21:35445523-35732332	48.929
ENSG00000162909	CAPN2	chr1:223889294-223963720	48.9283
ENSG00000118363	SPCS2	chr11:74660291-74690076	48.8239
ENSG00000143252	SDHC	chr1:161284046-161332984	48.823
ENSG00000064932	SBNO2	chr19:1107635-1174282	48.797
ENSG00000251546	IGKV1D-39	chr2:89901291-89901791	48.7928
ENSG00000089737	DDX24	chr14:94517265-94547591	48.7599
ENSG00000166595	FAM96B	chr16:66965958-66968326	48.735
ENSG00000158773	USF1	chr1:161009040-161015767	48.7319
ENSG00000257727	CNPY2	chr12:56665482-56727837	48.7025
ENSG00000197324	LRP10	chr14:23340821-23350789	48.6759
ENSG00000129235	TXNDC17	chr17:6481467-6554954	48.6431
ENSG00000116521	SCAMP3	chr1:155225769-155232221	48.6135
ENSG00000130202	PVRL2	chr19:45349431-45406946	48.6084
ENSG00000114125	RNF7	chr3:141457045-141466402	48.5949
ENSG00000022277	RTFDC1	chr20:55043646-55101198	48.5933
ENSG00000164442	CITED2	chr6:139693392-139695757	48.5665
ENSG00000220205	VAMP2	chr17:8043789-8066864	48.5574
ENSG00000106683	LIMK1	chr7:73497262-73536855	48.531
ENSG00000186517	ARHGAP30	chr1:161016735-161039760	48.5308
ENSG00000146070	PLA2G7	chr6:46620677-46703430	48.5285
ENSG00000182809	CRIP2	chr14:105939298-105946499	48.5254
ENSG00000133612	AGAP3	chr7:150782917-150841523	48.4694
ENSG00000102030	NAA10	chrX:153126968-153200676	48.467
ENSG00000242616	GNG10	chr9:114393631-114432526	48.4438
ENSG00000156642	NPTN	chr15:73735498-73926475	48.4109
ENSG00000115216	NRBP1	chr2:27650656-27665126	48.388
ENSG00000118292	C1orf54	chr1:150237803-150253327	48.218
ENSG00000119632	IFI27L2	chr14:94594115-94596590	48.1953
ENSG00000100365	NCF4	chr22:37243414-37274057	48.1674
ENSG00000178209	PLEC	chr8:144989320-145050902	48.1612
ENSG00000216866	RPS2P55	chrX:40794197-40795117	48.1218
ENSG00000140941	MAP1LC3B	chr16:87117167-87438385	48.1131
ENSG00000134853	PDGFRA	chr4:54243809-55164414	48.1086
ENSG00000197912	SPG7	chr16:89557324-89624176	48.1047
ENSG00000153563	CD8A	chr2:87011728-87035519	48.0929
ENSG00000213676	ATF6B	chr6:32006041-32096030	48.0843
ENSG00000163823	CCR1	chr3:46205095-46308197	48.0666
ENSG00000131828	PDHA1	chrX:19362010-19533379	48.0301
ENSG00000143537	ADAM15	chr1:155006299-155035252	48.0054
ENSG00000165775	FUNDC2	chrX:154064062-154288578	48.0024
ENSG00000102316	MAGED2	chrX:54834031-54842445	47.9611
ENSG00000130332	LSM7	chr19:2321515-2355099	47.9558
ENSG00000172660	TAF15	chr17:34136458-34195895	47.8932
ENSG00000077147	TM9SF3	chr10:98277865-98347209	47.8869
ENSG00000235363	SNRPGP10	chr1:205305219-205326218	47.8631
ENSG00000213639	PPP1CB	chr2:28974505-29093167	47.8562
ENSG00000033627	ATP6V0A1	chr17:40610861-40674629	47.8334
ENSG00000166986	MARS	chr12:57853917-57914300	47.8316
ENSG00000140464	PML	chr15:74287013-74340153	47.8117
ENSG00000172183	ISG20	chr15:89179383-89199714	47.7727
ENSG00000133657	ATP13A3	chr3:194123400-194239008	47.7528
ENSG00000028528	SNX1	chr15:64386321-64438289	47.7282
ENSG00000145779	TNFAIP8	chr5:118604386-118735383	47.7255
ENSG00000010404	IDS	chrX:148558520-148632055	47.7142
ENSG00000169021	UQCRFS1	chr19:29698172-29706722	47.6955
ENSG00000189091	SF3B3	chr16:70557690-70608820	47.6806
ENSG00000213923	CSNK1E	chr22:38686696-38794934	47.6797
[truncated: 55,711 more rows]
