# Supplementary material for: A new synthetic toll-like receptor 1/2 ligand is an efficient adjuvant for peptide vaccination in a human volunteer
Source: J Immunother Cancer. 2019 Nov 15;7:307. doi: 10.1186/s40425-019-0796-5 (PMC6858783; doi:10.1186/s40425-019-0796-5)
Supplement: Supplementary file 3 — Additional file 3. Transcriptome Granuloma Margin (FPKM values). [file 40425_2019_796_MOESM3_ESM.xlsx]

## Sheet: FPKM Granuloma Margin
ID	GENE	LOCUS	FPKM
ENSG00000230043	TMSB4XP6	chr20:49411430-49493714	5516
ENSG00000166710	B2M	chr15:45003674-45011075	4918.07
ENSG00000087086	FTL	chr19:49468557-49470135	3905.02
ENSG00000170323	FABP4	chr8:82351670-82445510	3433.52
ENSG00000167996	FTH1	chr11:61717292-61735132	2917.73
ENSG00000113140	SPARC	chr5:151040656-151104343	2752.92
ENSG00000026025	VIM	chr10:17256237-17279592	2640.29
ENSG00000133112	TPT1	chr13:45911007-45965872	2550.22
ENSG00000148180	GSN	chr9:123940414-124095121	2053.64
ENSG00000135218	CD36	chr7:79959507-80308593	1978.78
ENSG00000237973	hsa-mir-6723	chr1:536815-660283	1947.69
ENSG00000117289	TXNIP	chr1:145438468-145442635	1793.01
ENSG00000197766	CFD	chr19:859452-863453	1672.55
ENSG00000205542	TMSB4X	chrX:12993226-12995346	1565.14
ENSG00000075624	ACTB	chr7:5566781-5603415	1556.54
ENSG00000197756	RPL37A	chr2:217250010-217443903	1492.78
ENSG00000034510	TMSB10	chr2:85048773-85134132	1473.18
ENSG00000011465	DCN	chr12:91539024-91576900	1457.1
ENSG00000008988	RPS20	chr8:56979853-56987069	1403.78
ENSG00000099194	SCD	chr10:102106880-102124591	1352.31
ENSG00000019582	CD74	chr5:149781199-149792492	1292.99
ENSG00000100097	LGALS1	chr22:38071614-38075813	1217.28
ENSG00000177600	RPLP2	chr11:799178-812880	1180.49
ENSG00000148671	ADIRF	chr10:88695296-88784489	1141.49
ENSG00000174444	RPL4	chr15:66790354-66858317	1133.64
ENSG00000142676	RPL11	chr1:24018268-24022915	1129.6
ENSG00000166819	PLIN1	chr15:90207595-90234014	1122.16
ENSG00000169710	FASN	chr17:80036213-80056208	1097.23
ENSG00000071082	RPL31	chr2:101436613-101886778	1081.09
ENSG00000111341	MGP	chr12:14956505-15059520	1025.2
ENSG00000181092	ADIPOQ	chr3:186560462-186576252	1024.55
ENSG00000142534	RPS11	chr19:49999621-50002946	1008.61
ENSG00000092841	MYL6	chr12:56544579-56584068	1005.85
ENSG00000145824	CXCL14	chr5:134895266-134970564	1000.42
ENSG00000167526	RPL13	chr16:89627064-89630950	954.089
ENSG00000108298	RPL19	chr17:37356535-37360980	953.833
ENSG00000156508	EEF1A1	chr6:74225472-74280319	932.163
ENSG00000125691	RPL23	chr17:37004117-37010096	920.432
ENSG00000156482	RPL30	chr8:98881067-99058697	909.532
ENSG00000213741	RPS29	chr14:50043389-50081390	900.295
ENSG00000079435	LIPE	chr19:42901279-43156507	899.896
ENSG00000234745	HLA-B	chr6:31321648-31325414	895.253
ENSG00000163453	IGFBP7	chr4:57829535-58071676	894.604
ENSG00000138326	RPS24	chr10:79793517-79816570	893.548
ENSG00000119927	GPAM	chr10:113909623-113975135	891.249
ENSG00000145592	RPL37	chr5:40825363-40835437	835.826
ENSG00000144713	RPL32	chr3:12837970-12913415	826.407
ENSG00000110651	CD81	chr11:2349978-2418649	823.965
ENSG00000101439	CST3	chr20:23608533-23619110	820.707
ENSG00000245532	NEAT1	chr11:65190244-65213011	808.245
ENSG00000231500	RPS18	chr6:33217310-33244287	805.227
ENSG00000175445	LPL	chr8:19759227-19824769	800.699
ENSG00000105974	CAV1	chr7:116164838-116201233	787.632
ENSG00000177666	PNPLA2	chr11:818901-842545	777.202
ENSG00000184009	ACTG1	chr17:79476996-79494802	777.105
ENSG00000187653	TMSB4XP8	chr4:91048685-92523064	761.694
ENSG00000100234	TIMP3	chr22:32908538-33454358	760.461
ENSG00000130600	H19	chr11:2016405-2022700	759.994
ENSG00000236552	RPL13AP5	chr10:98510044-98510675	752.567
ENSG00000131469	RPL27	chr17:41150289-41154976	752.002
ENSG00000167468	GPX4	chr19:1103935-1106787	749.965
ENSG00000167658	EEF2	chr19:3976053-3985467	744.142
ENSG00000111275	ALDH2	chr12:112123856-112247782	743.468
ENSG00000161970	RPL26	chr17:8268880-8286531	742.897
ENSG00000186468	RPS23	chr5:81267843-81574396	742.724
ENSG00000235174	RPL39P3	chr6:74078277-74161999	738.367
ENSG00000105193	RPS16	chr19:39923846-39926588	732.83
ENSG00000196205	EEF1A1P5	chr9:135894815-135896553	725.608
ENSG00000227097	RP11-742N3.1	chr11:81590892-82429124	716.496
ENSG00000136942	RPL35	chr9:127615754-127624260	712.647
ENSG00000135404	CD63	chr12:56119106-56124467	712.534
ENSG00000142937	RPS8	chr1:45205489-45244451	709.516
ENSG00000008394	MGST1	chr12:16500075-16763528	707.532
ENSG00000167676	PLIN4	chr19:4472283-4517716	707.35
ENSG00000256545	AL139819.1	chr10:102106880-102124591	704.001
ENSG00000022267	FHL1	chrX:135229558-135293518	703.975
ENSG00000137818	RPLP1	chr15:69745122-69748255	703.756
ENSG00000161016	RPL8	chr8:146015149-146017972	699.556
ENSG00000232573	RPL3P4	chr14:99439215-99439638	696.558
ENSG00000100316	RPL3	chr22:39708886-39716394	694.023
ENSG00000196616	ADH1B	chr4:100226120-100242558	688.419
ENSG00000137154	RPS6	chr9:19375448-19380252	688.007
ENSG00000004776	HSPB6	chr19:36245466-36248980	685.195
ENSG00000149273	RPS3	chr11:75110529-75133324	669.992
ENSG00000063177	RPL18	chr19:49118584-49140695	663.18
ENSG00000244398	RP11-466H18.1	chr11:16799841-17074583	661.242
ENSG00000187288	CIDEC	chr3:9908397-9921938	660.392
ENSG00000109475	RPL34	chr4:109541721-109551568	659.039
ENSG00000173812	EIF1	chr17:39775688-39943183	653.971
ENSG00000250722	SEPP1	chr5:42756902-42887494	643.135
ENSG00000204628	GNB2L1	chr5:180663908-180699308	640.299
ENSG00000189058	APOD	chr3:195295572-195311076	634.806
ENSG00000147403	RPL10	chrX:153618314-153650065	631.283
ENSG00000149925	ALDOA	chr16:30064410-30081778	624.831
ENSG00000204592	HLA-E	chr6:30457243-30461982	623.494
ENSG00000134419	RPS15A	chr16:18792616-18813000	613.575
ENSG00000226608	FTLP3	chr20:4004551-4005091	605.416
ENSG00000129538	RNASE1	chr14:21269386-21271437	604.883
ENSG00000213442	RPL18AP3	chr12:104609556-104744061	601.04
ENSG00000151726	ACSL1	chr4:185676748-185747972	599.459
ENSG00000110700	RPS13	chr11:17095935-17229530	598.015
ENSG00000197956	S100A6	chr1:153506078-153508720	597.32
ENSG00000170889	RPS9	chr19:54704609-54752862	594.213
ENSG00000197746	PSAP	chr10:73576054-73611126	593.816
ENSG00000130203	APOE	chr19:45409010-45412650	593.158
ENSG00000164587	RPS14	chr5:149822752-149829319	581.297
ENSG00000136156	ITM2B	chr13:48807293-48837063	579.125
ENSG00000105372	RPS19	chr19:42363987-42376994	575.294
ENSG00000151365	THRSP	chr11:77726760-77791265	575.091
ENSG00000182899	RPL35A	chr3:197615945-197687013	567.868
ENSG00000135821	GLUL	chr1:182350838-182361341	567.754
ENSG00000211445	GPX3	chr5:150400123-150408554	558.859
ENSG00000122406	RPL5	chr1:93297581-93307481	557.873
ENSG00000123689	G0S2	chr1:209834708-209908295	556.182
ENSG00000112306	RPS12	chr6:133135579-133138703	555.001
ENSG00000120885	CLU	chr8:27454433-27472548	554.801
ENSG00000143878	RHOB	chr2:20646834-20649200	543.278
ENSG00000164692	COL1A2	chr7:94023872-94060544	539.161
ENSG00000221983	UBA52	chr19:18682539-18731849	537.447
ENSG00000167588	GPD1	chr12:50497601-50505102	536.328
ENSG00000204525	HLA-C	chr6:31236525-31239907	534.973
ENSG00000204287	HLA-DRA	chr6:32407618-32412823	531.49
ENSG00000132386	SERPINF1	chr17:1665252-1680868	531.162
ENSG00000142089	IFITM3	chr11:318639-330122	522.686
ENSG00000140988	RPS2	chr16:2012052-2014861	519.215
ENSG00000108107	RPL28	chr19:55896712-55919145	513.012
ENSG00000168542	COL3A1	chr2:189839045-189877472	511.98
ENSG00000089157	RPLP0	chr12:120634488-120639038	508.504
ENSG00000115310	RTN4	chr2:55199324-55339757	507.994
ENSG00000062282	DGAT2	chr11:75469499-75514460	503.813
ENSG00000234851	RP11-3P17.3	chr3:161144214-161166030	502.503
ENSG00000169692	AGPAT2	chr9:139567594-139581875	499.259
ENSG00000172809	RPL38	chr17:72199720-72209481	491.596
ENSG00000198755	RPL10A	chr6:35436184-35438562	490.681
ENSG00000087460	GNAS	chr20:57393973-57486247	490.217
ENSG00000218426	RP11-475C16.1	chr6:153552454-153668623	481.608
ENSG00000109846	CRYAB	chr11:111779288-111797596	480.058
ENSG00000130066	SAT1	chrX:23801289-23804343	478.258
ENSG00000175061	FAM211A-AS1	chr17:16342135-16395467	474.591
ENSG00000177469	PTRF	chr17:40554469-40575535	466.672
ENSG00000139329	LUM	chr12:91496405-91505608	466.057
ENSG00000111640	GAPDH	chr12:6643092-6647537	461.318
ENSG00000138207	RBP4	chr10:95326421-95364237	455.566
ENSG00000182718	ANXA2	chr15:60639332-60695082	446.264
ENSG00000104904	OAZ1	chr19:2252250-2273487	438.898
ENSG00000234287	RP11-761N21.2	chr3:40803035-40803290	436.627
ENSG00000142173	COL6A2	chr21:47518010-47552763	433.608
ENSG00000196531	NACA	chr12:57106211-57181574	424.416
ENSG00000159403	C1R	chr12:7187512-7275097	423.931
ENSG00000149131	SERPING1	chr11:57364859-57382326	420.488
ENSG00000198034	RPS4X	chrX:71401202-71527037	416.848
ENSG00000206503	HLA-A	chr6:29909036-29913661	412.822
ENSG00000107562	CXCL12	chr10:44793037-44881941	410.71
ENSG00000230629	RPS23P8	chrX:70182813-70183143	409.78
ENSG00000166441	RPL27A	chr11:8703957-8932498	406.604
ENSG00000162244	RPL29	chr3:52027615-52029958	405.72
ENSG00000067560	RHOA	chr3:49396577-49453908	403.506
ENSG00000115461	IGFBP5	chr2:217536827-217858802	402.859
ENSG00000187514	PTMA	chr2:232571516-232578251	401.585
ENSG00000173432	SAA1	chr11:18287720-18291524	395.84
ENSG00000118181	RPS25	chr11:118868851-118901616	394.178
ENSG00000174748	RPL15	chr3:23933150-24022109	393.138
ENSG00000142156	COL6A1	chr21:47401650-47424964	388.67
ENSG00000148303	RPL7A	chr9:136215068-136218281	385.647
ENSG00000170296	GABARAP	chr17:7143332-7167302	385.404
ENSG00000101335	MYL9	chr20:34894257-35274619	385.081
ENSG00000114391	RPL24	chr3:101399934-101405626	383.221
ENSG00000140264	SERF2	chr15:44019115-44095241	379.688
ENSG00000197747	S100A10	chr1:151955390-151966866	377.428
ENSG00000125730	C3	chr19:6677714-6737614	375.522
ENSG00000163191	S100A11	chr1:151967006-152020383	375.054
ENSG00000137970	RPL7P9	chr1:97144429-97145176	374.356
ENSG00000149591	TAGLN	chr11:117070036-117103241	371.035
ENSG00000131143	COX4I1	chr16:85805363-85840650	370.576
ENSG00000130255	RPL36	chr19:5674957-5720583	369.097
ENSG00000143933	CALM2	chr2:47126413-47403740	368.947
ENSG00000070756	PABPC1	chr8:101698043-101735037	366.711
ENSG00000115268	RPS15	chr19:1438357-1440583	363.837
ENSG00000215030	RPL13P12	chr17:17286690-17287326	354.718
ENSG00000141753	IGFBP4	chr17:38599701-38613983	353.542
ENSG00000152583	SPARCL1	chr4:88394486-88452213	353.518
ENSG00000083845	RPS5	chr19:58897766-58906173	353.43
ENSG00000148175	STOM	chr9:124101354-124132531	353.076
ENSG00000244313	RP11-425L10.1	chr11:46417963-46615675	347.934
ENSG00000131981	LGALS3	chr14:55590827-55612126	347.321
ENSG00000142541	RPL13A	chr19:49949554-49995565	345.706
ENSG00000127184	COX7C	chr5:85913720-85916779	344.704
ENSG00000224631	RP11-51O6.1	chr16:61089302-61089868	343.12
ENSG00000116016	EPAS1	chr2:46520805-46613836	342.588
ENSG00000085063	CD59	chr11:33719806-33757991	341.706
ENSG00000234797	RPS3AP6	chr15:60060542-60061347	340.317
ENSG00000012660	ELOVL5	chr6:53132195-53213947	338.984
ENSG00000240583	AQP1	chr7:30692199-30965131	338.142
ENSG00000182326	C1S	chr12:7072407-7178336	334.582
ENSG00000175899	A2M	chr12:9217772-9268825	333.714
ENSG00000197958	RPL12	chr9:130209952-130213684	332.046
ENSG00000132475	H3F3B	chr17:73772514-73821886	330.441
ENSG00000172757	CFL1	chr11:65590492-65641063	328.856
ENSG00000234975	FTH1P2	chr1:228823161-228823574	328.655
ENSG00000108518	PFN1	chr17:4848946-4860426	328.622
ENSG00000227081	RP11-543P15.1	chr12:3186520-3395730	324.486
ENSG00000035862	TIMP2	chr17:76849058-76921469	323.016
ENSG00000131471	AOC3	chr17:41003200-41010147	321.06
ENSG00000111716	LDHB	chr12:21788275-21928515	318.578
ENSG00000150991	UBC	chr12:125396149-125401914	317.114
ENSG00000165949	IFI27	chr14:94571181-94583033	316.662
ENSG00000149806	FAU	chr11:64888099-64902004	316.348
ENSG00000101608	MYL12A	chr18:3247478-3261848	316.208
ENSG00000014641	MDH1	chr2:63348517-64054977	313.962
ENSG00000123349	PFDN5	chr12:53689074-53700961	309.61
ENSG00000125534	PPDPF	chr20:62152076-62153559	309.238
ENSG00000108821	COL1A1	chr17:48260649-48278993	309.091
ENSG00000185641	CTD-2287O16.1	chr5:115298150-115395815	308.748
ENSG00000185201	IFITM2	chr11:307630-315272	308.474
ENSG00000150093	ITGB1	chr10:33189246-33371030	307.219
ENSG00000100243	CYB5R3	chr22:43013845-43045574	306.964
ENSG00000091986	CCDC80	chr3:112323406-112368377	305.826
ENSG00000072778	ACADVL	chr17:7093208-7128592	304.635
ENSG00000135046	ANXA1	chr9:75766672-75785309	303.648
ENSG00000108654	DDX5	chr17:62495733-62658186	303.265
ENSG00000106211	HSPB1	chr7:75931860-75933612	301.947
ENSG00000110955	ATP5B	chr12:57031958-57039798	301.724
ENSG00000106538	RARRES2	chr7:150035407-150038763	300.453
ENSG00000134333	LDHA	chr11:18415934-18429972	300.289
ENSG00000068697	LAPTM4A	chr2:20232410-20251789	299.185
ENSG00000076706	MCAM	chr11:119179240-119192231	298.995
ENSG00000121691	CAT	chr11:34460471-34493609	298.505
ENSG00000109971	HSPA8	chr11:122928196-122933938	298.226
ENSG00000170315	UBB	chr17:16284111-16286059	298.068
ENSG00000176485	PLA2G16	chr11:63340666-63389143	295.817
ENSG00000188846	RPL14	chr3:40498782-40503861	294.88
ENSG00000196126	HLA-DRB1	chr6:32546545-32557625	293.241
ENSG00000128272	ATF4	chr22:39915699-39918691	291.629
ENSG00000165810	BTNL9	chr5:180467224-180488523	290.62
ENSG00000107796	ACTA2	chr10:90639490-90775542	289.704
ENSG00000145741	BTF3	chr5:72794232-72801460	289.561
ENSG00000213553	RPLP0P6	chr2:38633860-38742882	289.365
ENSG00000172270	BSG	chr19:567211-583493	289.022
ENSG00000115306	SPTBN1	chr2:54683421-54896812	285.936
ENSG00000122378	FAM213A	chr10:82167584-82192753	285.758
ENSG00000105971	CAV2	chr7:115850546-116148595	285.205
ENSG00000134531	EMP1	chr12:13349649-13369708	284.862
ENSG00000166347	CYB5A	chr18:71920529-71959251	282.7
ENSG00000213178	RP11-641D5.1	chr3:168801286-169381406	282.296
ENSG00000155368	DBI	chr2:120124496-120130126	281.331
ENSG00000139644	TMBIM6	chr12:49962000-50158717	281.098
ENSG00000079308	TNS1	chr2:218664511-218867718	281.043
ENSG00000231389	HLA-DPA1	chr6:33032345-33054978	280.977
ENSG00000231991	ANXA2P2	chr9:33624222-33625532	277.357
ENSG00000177697	CD151	chr11:818901-842545	274.329
ENSG00000198618	PPIAP22	chr21:20230096-20230594	272.503
ENSG00000163815	CLEC3B	chr3:44956748-45077563	271.956
ENSG00000198363	ASPH	chr8:61969716-62627155	271.9
ENSG00000117592	PRDX6	chr1:173446404-173457946	269.047
ENSG00000196154	S100A4	chr1:153516088-153522612	269.03
ENSG00000099622	CIRBP	chr19:1259383-1274879	268.516
ENSG00000109610	SOD3	chr4:24791533-24802464	267.921
ENSG00000004799	PDK4	chr7:95212810-95225803	266.949
ENSG00000164733	CTSB	chr8:11700032-11726957	266.538
ENSG00000164111	ANXA5	chr4:122589109-122618268	265.145
ENSG00000125968	ID1	chr20:30193085-30194318	264.363
ENSG00000227615	RP11-864N7.2	chr11:74456760-74457159	263.634
ENSG00000178464	CTD-2192J16.15	chr19:12754088-12792716	261.164
ENSG00000198668	CALM1	chr14:90862845-90874605	259.964
ENSG00000197111	PCBP2	chr12:53835388-53893847	258.766
ENSG00000173511	VEGFB	chr11:64002009-64006259	258.182
ENSG00000183405	RPS7P1	chr17:26782769-26972472	257.536
ENSG00000075415	SLC25A3	chr12:98987368-98995946	257.178
ENSG00000143947	RPS27A	chr2:55401926-55462989	256.853
ENSG00000168385	SEPT2	chr2:242166678-242293442	255.992
ENSG00000256309	AC009469.1	chr2:218664511-218867718	255.914
ENSG00000198744	RP5-857K21.11	chr1:536815-660283	252.026
ENSG00000171858	RPS21	chr20:60962171-60963576	250.072
ENSG00000167978	SRRM2	chr16:2787076-2827298	249.645
ENSG00000114353	GNAI2	chr3:50263723-50296787	248.359
ENSG00000135535	CD164	chr6:109687716-109703762	247.774
ENSG00000181163	NPM1	chr5:170814119-170838141	245.649
ENSG00000242299	RP11-234A1.1	chr3:101292938-101313281	244.55
ENSG00000009307	CSDE1	chr1:115259533-115301297	243.595
ENSG00000169045	HNRNPH1	chr5:179041178-179061785	243.538
ENSG00000102317	RBM3	chrX:48431481-48437454	242.605
ENSG00000173915	USMG5	chr10:105127723-105156223	240.167
ENSG00000139239	RPL14P1	chr12:63359094-63359764	239.545
ENSG00000143198	MGST3	chr1:165600097-165631033	239.397
ENSG00000074416	MGLL	chr3:127407908-127542051	239.075
ENSG00000135424	ITGA7	chr12:56075329-56118489	238.618
ENSG00000108679	LGALS3BP	chr17:76967319-76976191	237.177
ENSG00000164924	YWHAZ	chr8:101928752-101965616	237.025
ENSG00000117984	CTSD	chr11:1753639-1785255	236.47
ENSG00000242071	RPL7AP6	chr14:70320847-70499083	235.962
ENSG00000233276	GPX1	chr3:49394608-49396033	235.426
ENSG00000024422	EHD2	chr19:48110780-48246391	235.317
ENSG00000226221	AC022431.1	chr5:55800461-55800899	234.54
ENSG00000065978	YBX1	chr1:43148097-43168020	234.091
ENSG00000096384	HSP90AB1	chr6:44214823-44221620	233.329
ENSG00000163430	FSTL1	chr3:120111139-120170100	233.057
ENSG00000163931	TKT	chr3:53258722-53290068	232.624
ENSG00000110321	EIF4G2	chr11:10804859-10830657	231.708
ENSG00000100129	EIF3L	chr22:38226861-38285414	231.502
ENSG00000236439	RP11-175B9.3	chr1:202317826-202679545	231.353
ENSG00000140391	TSPAN3	chr15:77336021-77376326	231.03
ENSG00000131473	ACLY	chr17:40023160-40086795	229.446
ENSG00000005249	PRKAR2B	chr7:106685093-106802256	229.388
ENSG00000212802	RPL15P3	chr6:12514341-12515006	227.924
ENSG00000095637	SORBS1	chr10:97071527-97321171	227.681
ENSG00000126247	CAPNS1	chr19:36630476-36641255	227.175
ENSG00000134871	COL4A2	chr13:110801317-111165374	223.92
ENSG00000213494	CCL14	chr17:34310326-34338658	223.092
ENSG00000118680	MYL12B	chr18:3261906-3278282	222.869
ENSG00000245848	CEBPA	chr19:33790839-33793470	222.851
ENSG00000196230	TUBB	chr6:30687977-30693203	222.569
ENSG00000104529	EEF1D	chr8:144661805-144682485	222.509
ENSG00000254772	EEF1G	chr11:62327072-62359649	221.242
ENSG00000120049	KCNIP2	chr10:103578834-103603677	218.685
ENSG00000240342	RPS2P5	chr12:118587605-118810750	218.571
ENSG00000105373	GLTSCR2	chr19:48248778-48272097	218.432
ENSG00000173641	HSPB7	chr1:16340522-16360545	217.904
ENSG00000169714	CNBP	chr3:128888326-128902765	217.899
ENSG00000125868	DSTN	chr20:17550507-17590564	217.575
ENSG00000169764	UGP2	chr2:64068073-64118696	216.965
ENSG00000196924	FLNA	chrX:153576891-153603006	216.319
ENSG00000089009	RPL6	chr12:112842993-112947717	216.055
ENSG00000087245	MMP2	chr16:55423611-55540603	215.952
ENSG00000100650	SRSF5	chr14:70193616-70238722	215.004
ENSG00000172037	LAMB2	chr3:49158546-49170551	214.604
ENSG00000171863	RPS7	chr2:3622794-3628509	214.494
ENSG00000170275	CRTAP	chr3:33155470-33189265	212.304
ENSG00000157514	TSC22D3	chrX:106956450-107020572	212.268
ENSG00000176340	COX8A	chr11:63742078-63933578	210.977
ENSG00000104964	AES	chr19:3052907-3063105	209.835
ENSG00000143819	EPHX1	chr1:225997793-226070069	209.151
ENSG00000165269	AQP7	chr9:33384764-33402643	208.862
ENSG00000122566	HNRNPA2B1	chr7:26229546-26252976	207.107
ENSG00000113558	SKP1	chr5:133450401-133706738	206.827
ENSG00000223865	HLA-DPB1	chr6:33032345-33054978	206.117
ENSG00000100201	DDX17	chr22:38864066-38903665	205.901
ENSG00000178719	GRINA	chr8:145051320-145101933	205.109
ENSG00000152234	ATP5A1	chr18:43664109-43708299	203.883
ENSG00000219507	FTH1P8	chrX:147133752-147134266	203.433
ENSG00000124942	AHNAK	chr11:62201015-62323707	202.573
ENSG00000251705	RNA5-8SP6	chrY:10037763-10037915	202.482
ENSG00000223361	FTH1P10	chr5:17353803-17355008	202.288
ENSG00000158710	TAGLN2	chr1:159887896-159895522	201.876
ENSG00000123416	TUBA1B	chr12:49521564-49541652	200.784
ENSG00000169564	PCBP1	chr2:70187225-70316332	200.676
ENSG00000135390	ATP5G2	chr12:54026509-54071192	199.819
ENSG00000243678	NME1-NME2	chr17:49230896-49249108	198.273
ENSG00000142798	HSPG2	chr1:22138757-22263790	197.724
ENSG00000088832	FKBP1A	chr20:1290618-1373806	197.256
ENSG00000084207	GSTP1	chr11:67351065-67354131	195.757
ENSG00000178980	SEPW1	chr19:48281828-48287943	195.355
ENSG00000230202	RP11-632C17__A.1	chr6:118228688-118638839	195.031
ENSG00000123384	LRP1	chr12:57482676-57607134	194.887
ENSG00000269378	ITGB1P1	chr19:14729928-14889353	194.071
ENSG00000162576	MXRA8	chr1:1288068-1297157	193.873
ENSG00000160678	S100A1	chr1:153591262-153618782	193.836
ENSG00000228474	OST4	chr2:27265231-27294641	192.488
ENSG00000143761	ARF1	chr1:228270360-228286912	192.343
ENSG00000140319	SRP14	chr15:40327939-40331389	192.306
ENSG00000135447	PPP1R1A	chr12:54943133-54982443	192.206
ENSG00000115524	SF3B1	chr2:198254507-198299815	192.087
ENSG00000185650	ZFP36L1	chr14:69254376-69263190	190.536
ENSG00000130402	ACTN4	chr19:39138288-39260544	189.858
ENSG00000163466	ARPC2	chr2:219081816-219119079	189.677
ENSG00000104870	FCGRT	chr19:50010072-50029590	189.443
ENSG00000152518	ZFP36L2	chr2:43393799-43823185	188.96
ENSG00000163520	FBLN2	chr3:13573823-13679922	188.224
ENSG00000163513	TGFBR2	chr3:30647993-30735634	187.024
ENSG00000089220	PEBP1	chr12:118501397-118583389	186.693
ENSG00000154518	ATP5G3	chr2:176040985-176049335	185.855
ENSG00000161960	EIF4A1	chr17:7465191-7536700	185.155
ENSG00000162407	PPAP2B	chr1:56960418-57110974	184.726
ENSG00000074800	ENO1	chr1:8921060-8939953	184.508
ENSG00000203875	SNHG5	chr6:86370709-86388451	183.675
ENSG00000112335	SNX3	chr6:108532425-108582464	183.214
ENSG00000111897	SERINC1	chr6:122764498-122792967	182.961
ENSG00000219200	RNASEK	chr17:6757179-6922978	182.925
ENSG00000185825	BCAP31	chrX:152965946-152990152	182.635
ENSG00000162444	RBP7	chr1:10057263-10076078	182.278
ENSG00000156976	EIF4A2	chr3:186499568-186524847	182.162
ENSG00000131477	RAMP2	chr17:40905931-40915059	182.147
ENSG00000104408	EIF3E	chr8:109213444-109447562	181.911
ENSG00000166482	MFAP4	chr17:19240866-19290553	181.709
ENSG00000119185	ITGB1BP1	chr2:9346893-9563676	181.356
ENSG00000161011	SQSTM1	chr5:179224596-179334859	180.381
ENSG00000187498	COL4A1	chr13:110801317-111165374	178.953
ENSG00000235552	RPL6P27	chr18:6462142-6463014	178.817
ENSG00000109099	PMP22	chr17:15133094-15169024	178.64
ENSG00000108953	YWHAE	chr17:1247565-1303672	178.009
ENSG00000169020	ATP5I	chr4:666224-683230	177.868
ENSG00000164919	COX6C	chr8:100025493-100906290	177.652
ENSG00000112936	C7	chr5:40909353-40983041	176.505
ENSG00000111077	TENC1	chr12:53399941-53458156	176.216
ENSG00000165502	RPL36AL	chr14:50085236-50087403	175.853
ENSG00000073921	PICALM	chr11:85668726-85780924	175.351
ENSG00000108946	PRKAR1A	chr17:66255322-66760023	175.128
ENSG00000170027	YWHAG	chr7:75956115-75988348	174.573
ENSG00000197043	ANXA6	chr5:150480272-150537443	174.507
ENSG00000213145	CRIP1	chr14:105952653-105965912	174.322
ENSG00000174059	CD34	chr1:208057593-208084747	173.837
ENSG00000108960	MMD	chr17:53469973-53499353	173.518
ENSG00000104763	ASAH1	chr8:17913933-17953903	172.649
ENSG00000196262	PPIA	chr7:44836278-44864163	172.639
ENSG00000227008	RP3-417G15.1	chrX:132669772-133119922	171.956
ENSG00000132170	PPARG	chr3:12328866-12475855	171.561
ENSG00000156467	UQCRB	chr8:97238147-97250262	171.433
ENSG00000100345	MYH9	chr22:36677326-36784063	170.852
ENSG00000116251	RPL22	chr1:6241328-6296032	170.802
ENSG00000108551	RASD1	chr17:17397750-17399709	170.745
ENSG00000265573	AC004943.1	chr16:72699068-73093597	170.159
ENSG00000129824	RPS4Y1	chrY:2709526-2800041	169.916
ENSG00000165119	HNRNPK	chr9:86582997-86595569	169.299
ENSG00000181524	RPL24P4	chr6:42924082-42924503	168.702
ENSG00000137575	SDCBP	chr8:59465482-59495419	168.345
ENSG00000124614	RPS10	chr6:34247455-34393902	168.24
ENSG00000184113	CLDN5	chr22:19510546-19515068	168.124
ENSG00000117450	PRDX1	chr1:45959537-45988719	167.968
ENSG00000160307	S100B	chr21:48018874-48025121	167.782
ENSG00000184811	TUSC5	chr17:1182956-1204281	167.738
ENSG00000183283	DAZAP2	chr12:51632075-51665146	167.455
ENSG00000100075	SLC25A1	chr22:19163094-19166343	167.338
ENSG00000203883	SOX18	chr20:62588054-62680994	167.204
ENSG00000173372	C1QA	chr1:22962998-22966101	166.835
ENSG00000185215	TNFAIP2	chr14:103589778-103603776	166.14
ENSG00000084234	APLP2	chr11:129936835-130014699	165.485
ENSG00000198242	RPL23A	chr17:27046410-27070473	165.014
ENSG00000053438	NNAT	chr20:36120873-36156333	164.37
ENSG00000133318	RTN3	chr11:63448917-63527363	164.185
ENSG00000160789	LMNA	chr1:156052363-156109880	164.039
ENSG00000167460	TPM4	chr19:16177830-16213813	164.014
ENSG00000196683	TOMM7	chr7:22852250-22862470	163.789
ENSG00000197879	MYO1C	chr17:1367391-1396106	163.496
ENSG00000234664	HMGN2P5	chr15:29991570-30261068	163.155
ENSG00000166794	PPIB	chr15:64443913-64455404	162.77
ENSG00000159377	PSMB4	chr1:151372009-151374420	162.768
ENSG00000146677	AC004453.8	chr7:44418719-44530479	161.866
ENSG00000146674	IGFBP3	chr7:45951948-45961473	161.637
ENSG00000179010	MRFAP1	chr4:6641817-6644472	161.293
ENSG00000130522	JUND	chr19:18390562-18392432	161.137
ENSG00000142192	APP	chr21:27252860-27589700	160.973
ENSG00000140416	TPM1	chr15:63334830-63364114	160.595
ENSG00000143196	DPT	chr1:168664696-168698502	160.101
ENSG00000179344	HLA-DQB1	chr6:32627243-32636160	159.992
ENSG00000185885	IFITM1	chr11:307630-315272	159.716
ENSG00000185624	P4HB	chr17:79801034-79818570	159.516
ENSG00000254999	BRK1	chr3:10157275-10168874	159.048
ENSG00000105223	PLD3	chr19:40825442-40896094	158.651
ENSG00000143774	GUK1	chr1:228327662-228336685	158.275
ENSG00000115414	FN1	chr2:216225162-216300895	156.901
ENSG00000161649	CD300LG	chr17:41924515-41940997	156.249
ENSG00000071967	CYBRD1	chr2:172378756-172414643	155.507
ENSG00000151366	NDUFC2	chr11:77726760-77791265	155.423
ENSG00000042445	RETSAT	chr2:85569210-85618875	155.202
ENSG00000106153	CHCHD2	chr7:56169261-56174269	155.115
ENSG00000091513	TF	chr3:133380841-133497850	154.798
ENSG00000241468	ATP5J2	chr7:98923520-99063954	154.776
ENSG00000072310	SREBF1	chr17:17584786-17740325	154.692
ENSG00000182704	TSKU	chr11:76493294-76509198	154.51
ENSG00000187193	MT1X	chr16:56716335-56721964	154.502
ENSG00000131069	ACSS2	chr20:33432522-33515769	154.175
ENSG00000133639	BTG1	chr12:92378755-92583436	152.894
ENSG00000102804	TSC22D1	chr13:45007654-45151283	152.087
ENSG00000004399	PLXND1	chr3:129274017-129325661	151.457
ENSG00000177700	POLR2L	chr11:818901-842545	150.997
ENSG00000130707	ASS1	chr9:133320315-133376661	150.721
ENSG00000109107	ALDOC	chr17:26782769-26972472	150.556
ENSG00000198258	UBL5	chr19:9938567-9940791	149.931
ENSG00000135940	COX5B	chr2:98262502-98264846	149.674
ENSG00000101938	CHRDL1	chrX:109917083-110039286	149.556
ENSG00000198563	DDX39B	chr6:31496493-31526606	149.419
ENSG00000168906	MAT2A	chr2:85766287-85788670	148.75
ENSG00000224550	RP11-270C12.3	chr1:108047824-108048070	148.729
ENSG00000142910	TINAGL1	chr1:32042115-32053288	148.513
ENSG00000159335	PTMS	chr12:6857169-6880116	148.251
ENSG00000154723	ATP5J	chr21:27011583-27144771	148.155
ENSG00000102144	PGK1	chrX:77320684-77384793	148.144
ENSG00000166913	YWHAB	chr20:43514316-43537173	148.141
ENSG00000185883	ATP6V0C	chr16:2525146-2581423	147.853
ENSG00000204196	AC011737.2	chr2:203879601-204091101	147.622
ENSG00000067113	PPAP2A	chr5:54603587-54830878	147.384
ENSG00000143248	RGS5	chr1:163080910-163325554	146.652
ENSG00000127884	ECHS1	chr10:135175983-135187193	146.636
ENSG00000112759	SLC29A1	chr6:44187241-44201888	146.624
ENSG00000107223	EDF1	chr9:139756570-139760738	146.148
ENSG00000183648	NDUFB1	chr14:92582465-92588261	145.91
ENSG00000184897	H1FX	chr3:129033614-129045068	145.652
ENSG00000152795	HNRNPDL	chr4:83343716-83351294	145.544
ENSG00000088986	DYNLL1	chr12:120907652-120936296	144.965
ENSG00000167615	LENG8	chr19:54955990-54974894	144.868
ENSG00000077942	FBLN1	chr22:45898117-45997015	144.771
ENSG00000147065	MSN	chrX:64808256-64961791	144.679
ENSG00000179218	CALR	chr19:13049391-13055303	144.607
ENSG00000221968	FADS3	chr11:61640990-61659523	144.584
ENSG00000161547	SRSF2	chr17:74722911-74777531	144.511
ENSG00000141522	ARHGDIA	chr17:79825596-79829282	144.387
ENSG00000134548	C12orf39	chr12:21679240-21757781	144.38
ENSG00000182809	CRIP2	chr14:105939298-105946499	143.894
ENSG00000214485	RPL7P1	chr5:149432853-149492935	143.666
ENSG00000123144	C19orf43	chr19:12841453-12845589	143.142
ENSG00000127528	KLF2	chr19:16435627-16438685	143.089
ENSG00000096060	FKBP5	chr6:35541361-35696360	142.772
ENSG00000142168	SOD1	chr21:33031934-33041244	142.767
ENSG00000260032	LINC00657	chr20:34633543-34638882	142.584
ENSG00000184007	PTP4A2	chr1:32307619-32410457	142.56
ENSG00000165507	C10orf10	chr10:45306471-45491339	142.203
ENSG00000126267	COX6B1	chr19:36139124-36149763	142.176
ENSG00000162734	PEA15	chr1:160171988-160185166	142.047
ENSG00000174697	LEP	chr7:127881336-127897681	141.937
ENSG00000233762	AC007969.5	chr2:172373748-172374232	141.736
ENSG00000089063	TMEM230	chr20:5080485-5093749	141.7
ENSG00000099341	PSMD8	chr19:38865175-38874464	141.251
ENSG00000175567	UCP2	chr11:73685711-73694352	140.655
ENSG00000101182	PSMA7	chr20:60711790-60718496	140.486
ENSG00000104805	NUCB1	chr19:49403306-49426629	139.509
ENSG00000113732	ATP6V0E1	chr5:172410759-172462448	139.463
ENSG00000120129	DUSP1	chr5:172185228-172204777	139.299
ENSG00000233927	RPS28	chr19:8367010-8408146	138.954
ENSG00000103202	NME4	chr16:446724-462487	138.658
ENSG00000080824	HSP90AA1	chr14:102547074-102771537	137.894
ENSG00000099795	NDUFB7	chr19:14676889-14682874	137.832
ENSG00000166033	HTRA1	chr10:124221040-124274424	137.416
ENSG00000116209	TMEM59	chr1:54497346-54519177	137.146
ENSG00000166598	HSP90B1	chr12:104235228-104359486	137.018
ENSG00000164405	UQCRQ	chr5:132196872-132203723	136.098
ENSG00000157150	TIMP4	chr3:12045875-12232900	136.096
ENSG00000129562	DAD1	chr14:23033804-23058175	136.078
ENSG00000151632	AKR1C2	chr10:5029966-5060223	135.997
ENSG00000241837	ATP5O	chr21:34876237-35349992	135.974
ENSG00000112769	LAMA4	chr6:112429962-112672498	135.747
ENSG00000167779	IGFBP6	chr12:53491219-53496129	135.68
ENSG00000105401	CDC37	chr19:10501809-10580305	135.518
ENSG00000250479	CHCHD10	chr22:24105207-24126503	135.461
ENSG00000166165	CKB	chr14:103985995-103989448	135.363
ENSG00000105221	AKT2	chr19:40736223-40791443	135.288
ENSG00000168653	NDUFS5	chr1:39491989-39500308	135.237
ENSG00000182087	TMEM259	chr19:999600-1021117	135.015
ENSG00000119655	NPC2	chr14:74942894-74963809	134.433
ENSG00000169504	CLIC4	chr1:25071847-25170815	134.285
ENSG00000155366	RHOC	chr1:113243727-113258099	134.131
ENSG00000100300	TSPO	chr22:43547519-43559248	133.669
ENSG00000136238	RAC1	chr7:6414153-6443608	133.555
ENSG00000167815	PRDX2	chr19:12873816-12985765	133.346
ENSG00000009950	MLXIPL	chr7:73007523-73038873	132.675
ENSG00000078369	GNB1	chr1:1716728-1822495	132.663
ENSG00000172889	EGFL7	chr9:139543061-139567130	132.548
ENSG00000186480	INSIG1	chr7:155089485-155101945	132.264
ENSG00000136003	ISCU	chr12:108956357-108963160	132.153
ENSG00000189171	S100A13	chr1:153591262-153618782	131.957
ENSG00000126458	RRAS	chr19:50138548-50143458	131.365
ENSG00000169908	TM4SF1	chr3:149086808-149104370	131.265
ENSG00000104823	ECH1	chr19:39306061-39342987	131.117
ENSG00000113387	SUB1	chr5:32531738-32604185	130.95
ENSG00000075785	RAB7A	chr3:128444964-128533639	130.946
ENSG00000101160	CTSZ	chr20:57570239-57582302	130.326
ENSG00000100979	PLTP	chr20:44517263-44540794	130.26
ENSG00000044115	CTNNA1	chr5:137946655-138270723	130.035
ENSG00000187109	NAP1L1	chr12:76438669-76478813	129.903
ENSG00000106991	ENG	chr9:130577290-130617035	129.898
ENSG00000255302	EID1	chr15:49115931-49255641	129.884
ENSG00000099817	POLR2E	chr19:1065921-1095598	129.62
ENSG00000144746	ARL6IP5	chr3:69134094-69155217	129.571
ENSG00000122545	SEPT7	chr7:35840541-35944917	129.481
ENSG00000240509	RPL34P18	chr8:94969565-94969919	129.461
ENSG00000118816	CCNI	chr4:77968310-77997158	129.375
ENSG00000065054	SLC9A3R2	chr16:2075356-2089027	129.138
ENSG00000116288	PARK7	chr1:8014350-8045565	129.048
ENSG00000019144	PHLDB1	chr11:118477154-118550399	128.521
ENSG00000111678	C12orf57	chr12:7052140-7055166	128.337
ENSG00000235297	FAUP1	chr18:72057118-72057532	128.291
ENSG00000122176	FMOD	chr1:203309755-203320617	128.016
ENSG00000111669	TPI1	chr12:6976282-7032861	127.888
ENSG00000145425	RPS3A	chr4:152020724-152246784	127.864
ENSG00000112096	SOD2	chr6:160090088-160210781	127.799
ENSG00000229638	RPL4P4	chr3:185000728-185216845	127.692
ENSG00000185896	LAMP1	chr13:113951555-113977987	127.579
ENSG00000164713	BRI3	chr7:97881690-98030380	127.546
ENSG00000106333	PCOLCE	chr7:100169854-100205798	127.405
ENSG00000189221	MAOA	chrX:43515466-43606068	127.379
ENSG00000143416	SELENBP1	chr1:151336777-151345209	127.335
ENSG00000130300	PLVAP	chr19:17462256-17488159	127.235
ENSG00000116560	SFPQ	chr1:35641978-35658749	126.872
ENSG00000164442	CITED2	chr6:139693392-139695757	126.791
ENSG00000168374	ARF4	chr3:57557089-57586654	126.786
ENSG00000178695	KCTD12	chr13:77454311-77460540	126.086
ENSG00000101955	SRPX	chrX:37208527-38548169	126.053
ENSG00000159176	CSRP1	chr1:201452657-201502736	125.95
ENSG00000117335	CD46	chr1:207925401-207968858	125.491
ENSG00000189403	HMGB1	chr13:31032883-31191734	125.439
ENSG00000116171	SCP2	chr1:53392900-53517375	125.422
ENSG00000135486	HNRNPA1	chr12:54624723-54745633	125.259
ENSG00000078596	ITM2A	chrX:78615880-78623164	124.917
ENSG00000197448	GSTK1	chr7:142941185-142985141	124.897
ENSG00000115677	HDLBP	chr2:242166678-242293442	124.742
ENSG00000161203	AP2M1	chr3:183851806-184402546	124.351
ENSG00000115053	NCL	chr2:232318241-232348352	124.238
ENSG00000266714	MYO15B	chr17:73584138-73704142	124.117
ENSG00000162909	CAPN2	chr1:223889294-223963720	123.647
ENSG00000167863	ATP5H	chr17:73028669-73061984	123.565
ENSG00000171223	JUNB	chr19:12873816-12985765	123.521
ENSG00000122786	CALD1	chr7:134429002-134655479	123.345
ENSG00000127022	CANX	chr5:179105583-179157926	122.88
ENSG00000138069	RAB1A	chr2:65283499-65357240	122.811
ENSG00000092199	HNRNPC	chr14:21677294-21737653	122.665
ENSG00000051620	HEBP2	chr6:138723721-139018425	122.405
ENSG00000177606	JUN	chr1:59246464-59249785	122.162
ENSG00000226084	RP4-706A16.3	chr1:77554674-77685115	122.092
ENSG00000174804	FZD4	chr11:86502100-86666433	122.056
ENSG00000128016	ZFP36	chr19:39897452-39900052	121.867
ENSG00000102760	RGCC	chr13:42031694-42045018	121.768
ENSG00000174886	NDUFA11	chr19:5865836-5904017	121.669
ENSG00000070831	CDC42	chr1:22379119-22419437	121.627
ENSG00000134590	FAM127A	chrX:134166332-134167576	121.622
ENSG00000214063	TSPAN4	chr11:842807-867116	121.418
ENSG00000030582	GRN	chr17:42422613-42430470	121.382
ENSG00000172354	GNB2	chr7:100271153-100276797	121.332
ENSG00000112695	COX7A2	chr6:75947390-75960039	121.237
ENSG00000122359	ANXA11	chr10:81910644-81965328	121.135
ENSG00000135926	TMBIM1	chr2:219135114-219232822	121.086
ENSG00000211592	IGKC	chr2:89109983-89165653	120.919
ENSG00000143537	ADAM15	chr1:155006299-155035252	120.639
ENSG00000204291	COL15A1	chr9:101705460-101833069	120.477
ENSG00000109332	UBE2D3	chr4:103715539-103790053	120.375
ENSG00000177156	TALDO1	chr11:747328-765024	120.253
ENSG00000062485	CS	chr12:56665482-56727837	119.99
ENSG00000008018	PSMB1	chr6:170844204-170862429	119.836
ENSG00000121310	ECHDC2	chr1:53361655-53392884	119.779
ENSG00000176014	TUBB6	chr18:12307667-12377313	119.773
ENSG00000111775	COX6A1	chr12:120875892-120899389	119.744
ENSG00000130303	BST2	chr19:17513747-17516457	119.681
ENSG00000147526	TACC1	chr8:38585703-38710546	119.648
ENSG00000111348	ARHGDIB	chr12:15094950-15114662	119.602
ENSG00000105701	FKBP8	chr19:18642422-18654887	119.528
ENSG00000168497	SDPR	chr2:192699027-193060435	119.509
ENSG00000167283	ATP5L	chr11:118230299-118302211	119.118
ENSG00000173369	C1QB	chr1:22979254-22988031	118.9
ENSG00000213719	CLIC1	chr6:31694814-31707540	118.585
ENSG00000131051	RBM39	chr20:34291530-34330234	118.4
ENSG00000218283	MORF4L1P1	chr1:220321634-220445796	118.318
ENSG00000099875	MKNK2	chr19:2037469-2051243	118.316
ENSG00000115380	EFEMP1	chr2:56093101-56151274	118.306
ENSG00000117318	ID3	chr1:23884408-23886285	118.074
ENSG00000231767	MIR4426	chr1:192685312-192685783	117.981
ENSG00000168028	RPSA	chr3:39448179-39454033	117.707
ENSG00000169567	HINT1	chr5:130494719-130541119	117.654
ENSG00000087274	ADD1	chr4:2845583-2931803	117.187
ENSG00000011600	TYROBP	chr19:36395302-36399197	116.791
ENSG00000138413	IDH1	chr2:209100950-209130798	116.775
ENSG00000140740	UQCRC2	chr16:21963980-21994981	116.771
ENSG00000178982	EIF3K	chr19:39109734-39127595	116.626
ENSG00000159189	C1QC	chr1:22970122-22974603	116.621
ENSG00000183722	LHFP	chr13:39917028-40177665	116.548
ENSG00000205246	RPSAP58	chr19:23945745-24057503	116.519
ENSG00000221978	CCNL2	chr1:1321090-1334708	116.485
ENSG00000100600	LGMN	chr14:93170151-93215047	116.36
ENSG00000140612	SEC11A	chr15:85212774-85259947	116.259
ENSG00000110799	VWF	chr12:6058039-6233936	116.121
ENSG00000104852	SNRNP70	chr19:49588675-49611862	116.066
ENSG00000221869	CEBPD	chr8:48649470-48651648	115.966
ENSG00000122862	SRGN	chr10:70847861-70864567	115.966
ENSG00000089280	FUS	chr16:31191430-31203127	115.898
ENSG00000101474	APMAP	chr20:24943560-24973615	115.863
ENSG00000138796	HADH	chr4:108910869-108956331	115.684
ENSG00000229119	CTB-63M22.1	chr5:165809309-165809604	115.63
ENSG00000116871	MAP7D1	chr1:36621179-36646450	115.527
ENSG00000119729	RHOQ	chr2:46717888-46852881	115.456
ENSG00000114942	EEF1B2	chr2:206979540-207027652	115.325
ENSG00000126432	PRDX5	chr11:64085559-64089283	115.049
ENSG00000178741	COX5A	chr15:75212131-75230509	115.043
ENSG00000100504	PYGL	chr14:51314839-51411454	114.995
ENSG00000157110	RBPMS	chr8:30239634-30429778	114.571
ENSG00000187134	AKR1C1	chr10:4934795-5025475	114.54
ENSG00000165672	PRDX3	chr10:120927214-120938345	114.516
ENSG00000049245	VAMP3	chr1:7831328-7841492	114.426
ENSG00000185787	MORF4L1	chr15:79051544-79190475	114.403
ENSG00000065518	NDUFB4	chr3:120315155-120321347	114.301
ENSG00000174807	CD248	chr11:66080323-66086708	114
ENSG00000108828	VAT1	chr17:41166621-41177140	113.907
ENSG00000140400	MAN2C1	chr15:75648132-75748183	113.779
ENSG00000126524	SBDS	chr7:66452663-66704501	113.77
ENSG00000235043	TECRP1	chr4:87797357-88062206	113.15
ENSG00000116754	SRSF11	chr1:70671364-70718735	113.036
ENSG00000185432	METTL7A	chr12:51317254-51326300	112.921
ENSG00000147677	EIF3H	chr8:117654368-117889107	112.727
ENSG00000133835	HSD17B4	chr5:118788137-118972894	112.54
ENSG00000131171	SH3BGRL	chrX:80457441-80554046	112.464
ENSG00000146066	HIGD2A	chr5:175792470-175843570	112.452
ENSG00000082641	NFE2L1	chr17:46125690-46138849	112.256
ENSG00000269636	AC010441.1	chr5:150157507-150176297	112.134
ENSG00000148248	SURF4	chr9:136228324-136242970	112.12
ENSG00000136859	ANGPTL2	chr9:129677052-129985445	112.054
ENSG00000010327	STAB1	chr3:52529353-52742182	111.909
ENSG00000136732	GYPC	chr2:127413508-127454246	111.742
ENSG00000090266	NDUFB2	chr7:140218219-140624564	111.726
ENSG00000185834	RPL12P4	chr20:53691154-53691685	111.62
ENSG00000228929	RP11-159C21.4	chr1:53192125-53293014	111.459
ENSG00000051523	CYBA	chr16:88709690-88717560	111.437
ENSG00000105583	WDR83OS	chr19:12754088-12792716	111.375
ENSG00000105220	GPI	chr19:34850384-34919178	111.257
ENSG00000244716	RP11-20O24.4	chr1:109512835-109584850	111.09
ENSG00000073712	FERMT2	chr14:53323985-53419153	110.878
ENSG00000115459	ELMOD3	chr2:85569210-85618875	110.87
ENSG00000132507	EIF5A	chr17:7210317-7232712	110.748
ENSG00000131236	CAP1	chr1:40505904-40538321	110.705
ENSG00000189129	PLAC9	chr10:81891437-81905115	110.651
ENSG00000134308	YWHAQ	chr2:9724100-9771143	110.183
ENSG00000214253	FIS1	chr7:100882738-100895597	110.089
ENSG00000133872	TMEM66	chr8:29920527-29940983	109.422
ENSG00000006831	ADIPOR2	chr12:1797739-1897844	109.366
ENSG00000099624	ATP5D	chr19:1241748-1244824	109.322
ENSG00000163479	SSR2	chr1:155978838-155990750	109.282
ENSG00000131446	MGAT1	chr5:180217540-180242652	109.172
ENSG00000188229	TUBB4B	chr9:140135664-140142222	109.048
ENSG00000165795	NDRG2	chr14:21484921-21572881	108.92
ENSG00000077549	CAPZB	chr1:19665266-19812066	108.55
ENSG00000140545	MFGE8	chr15:89441915-89456642	108.39
ENSG00000049540	ELN	chr7:73442118-73484237	108.131
ENSG00000103363	TCEB2	chr16:2787076-2827298	108.061
ENSG00000168209	DDIT4	chr10:74033677-74035794	107.935
ENSG00000138293	NCOA4	chr10:51565107-51590734	107.697
ENSG00000179776	CDH5	chr16:66400532-66438686	107.615
ENSG00000234964	FABP5P7	chr11:59480295-59573354	107.491
ENSG00000175390	EIF3F	chr11:7991797-8023409	107.345
ENSG00000147684	NDUFB9	chr8:125500725-125740730	106.913
ENSG00000143162	CREG1	chr1:167498913-167523004	106.511
ENSG00000047849	MAP4	chr3:47892181-48130769	106.255
ENSG00000182871	COL18A1	chr21:46825051-46964325	105.626
ENSG00000077782	FGFR1	chr8:38268655-38326352	105.341
ENSG00000176194	CIDEA	chr18:12254317-12277594	105.272
ENSG00000171992	SYNPO	chr5:149980641-150038782	104.98
ENSG00000165629	ATP5C1	chr10:7830091-7849778	104.929
ENSG00000218175	AC016739.2	chr2:177065635-177065980	104.925
ENSG00000237264	FTH1P11	chr8:82351670-82445510	104.82
ENSG00000185000	DGAT1	chr8:145539953-145550573	104.716
ENSG00000149100	EIF3M	chr11:32605343-32816204	104.314
ENSG00000168899	VAMP5	chr2:85811530-85820535	103.933
ENSG00000139641	ESYT1	chr12:56511942-56538455	103.734
ENSG00000169439	SDC2	chr8:97505578-97624000	103.693
ENSG00000265681	RPL17	chr18:47008027-47018906	103.301
ENSG00000163359	COL6A3	chr2:238232645-238323018	103.207
ENSG00000198832	SELM	chr22:31500757-31516055	103.196
ENSG00000107372	ZFAND5	chr9:74966340-74980163	103.009
ENSG00000010278	CD9	chr12:6308880-6347425	102.745
ENSG00000166136	NDUFB8	chr10:102246398-102319755	102.351
ENSG00000104419	NDRG1	chr8:134249413-134314265	102.289
ENSG00000150593	PDCD4	chr10:112629500-112679032	102.284
ENSG00000133027	PEMT	chr17:17408876-17513799	102.244
ENSG00000008282	SYPL1	chr7:105730948-105753022	102.179
ENSG00000155957	TMBIM4	chr12:66516841-66563852	102.172
ENSG00000130429	ARPC1B	chr7:98923520-99063954	101.868
ENSG00000117519	CNN3	chr1:95362506-95392834	101.778
ENSG00000152082	MZT2B	chr2:130908980-130948302	101.539
ENSG00000132471	WBP2	chr17:73841779-73852588	101.527
ENSG00000111843	TMEM14C	chr6:10723147-10731362	101.324
ENSG00000102265	TIMP1	chrX:47420515-47479252	101.288
ENSG00000142669	SH3BGRL3	chr1:26605666-26647014	101.152
ENSG00000111229	ARPC3	chr12:110810704-110888227	101.092
ENSG00000066027	PPP2R5A	chr1:212458878-212535200	100.802
ENSG00000125520	SLC2A4RG	chr20:62289162-62374858	100.737
ENSG00000137076	TLN1	chr9:35696944-35758572	100.695
ENSG00000145730	PAM	chr5:102089684-102366809	100.561
ENSG00000109472	CPE	chr4:166282345-166419472	100.403
ENSG00000110696	C11orf58	chr11:15987994-16778428	100.336
ENSG00000087302	C14orf166	chr14:52456192-52471420	100.25
ENSG00000153113	CAST	chr5:95220801-96143803	100.246
ENSG00000168066	SF1	chr11:64532077-64546258	100.226
ENSG00000134884	ARGLU1	chr13:107194020-107220512	100.207
ENSG00000167004	PDIA3	chr15:44019115-44095241	100.204
ENSG00000189067	LITAF	chr16:11641852-11730237	100.169
ENSG00000068001	HYAL2	chr3:50355220-50365682	100.15
ENSG00000135506	OS9	chr12:58087737-58115340	100.145
ENSG00000204257	HLA-DMA	chr6:32902405-32949282	99.9005
ENSG00000116459	ATP5F1	chr1:111981259-112005395	99.7534
ENSG00000258818	RNASE4	chr14:21152258-21175279	99.7199
ENSG00000188643	S100A16	chr1:153579361-153585621	99.5756
ENSG00000106682	EIF4H	chr7:73588574-73611431	99.5134
ENSG00000126005	MMP24-AS1	chr20:33703166-33872788	99.36
ENSG00000027697	IFNGR1	chr6:137518620-137540586	99.3193
ENSG00000111885	MAN1A1	chr6:119498373-119670926	99.2937
ENSG00000123562	MORF4L2	chrX:102930423-102946700	99.2302
ENSG00000124785	NRN1	chr6:5998231-6007200	99.1252
ENSG00000122705	CLTA	chr9:36190852-36304921	98.9312
ENSG00000034713	GABARAPL2	chr16:75562429-75657198	98.7846
ENSG00000135678	CPM	chr12:69201955-69365350	98.6521
ENSG00000172057	ORMDL3	chr17:38077293-38083854	98.5314
ENSG00000109046	WSB1	chr17:25621101-25640657	98.2841
ENSG00000170345	FOS	chr14:75745476-75748933	98.0946
ENSG00000140105	WARS	chr14:100800124-100996640	98.0445
ENSG00000235655	H3F3AP4	chr2:175411868-175639555	98.0425
ENSG00000090006	LTBP4	chr19:41098788-41135725	98.0302
ENSG00000176720	BOK	chr2:242483817-242513546	97.9262
ENSG00000163463	KRTCAP2	chr1:155141883-155162707	97.9206
ENSG00000166619	BLCAP	chr20:36120873-36156333	97.9201
ENSG00000143742	SRP9	chr1:225965530-225978168	97.8418
ENSG00000167552	TUBA1A	chr12:49578578-49667114	97.6835
ENSG00000134352	IL6ST	chr5:55230922-55290821	97.6751
ENSG00000165092	ALDH1A1	chr9:75515577-75695358	97.5229
ENSG00000197894	ADH5	chr4:99992131-100009952	97.3351
ENSG00000198830	HMGN2	chr1:26798940-26802463	97.2072
ENSG00000142657	PGD	chr1:10458648-10480201	97.1682
ENSG00000063046	EIF4B	chr12:53399941-53458156	97.0671
ENSG00000170989	S1PR1	chr1:101702443-101707074	97.06
ENSG00000143612	C1orf43	chr1:154179181-154243986	97.0393
ENSG00000090382	LYZ	chr12:69742120-69748014	97.0372
ENSG00000067167	TRAM1	chr8:71485676-71520622	97.0331
ENSG00000106803	SEC61B	chr9:101984345-101992897	96.8749
ENSG00000145901	TNIP1	chr5:150409505-150473138	96.8057
ENSG00000167641	PPP1R14A	chr19:38734674-38795649	96.5466
ENSG00000249936	RAC1P2	chr4:46725792-46726625	96.3423
ENSG00000081760	AACS	chr12:125549924-125627873	96.0954
ENSG00000165678	GHITM	chr10:85898175-85913001	96.083
ENSG00000108774	RAB5C	chr17:40265125-40307990	96.0587
ENSG00000214736	TOMM6	chr6:41737913-41863099	95.7931
ENSG00000229117	RPL41	chr12:56510369-56511727	95.7156
ENSG00000005022	SLC25A5	chrX:118599996-118605282	95.5513
ENSG00000148053	NTRK2	chr9:87283465-87638505	95.5509
ENSG00000183291	SEPT15	chr1:87328131-87380107	95.5304
ENSG00000129084	PSMA1	chr11:14464985-14665181	95.407
ENSG00000164096	C4orf3	chr4:120218206-120225600	95.3754
ENSG00000165280	VCP	chr9:35056060-35073246	95.2791
ENSG00000272761	RP11-572C15.6	chr3:112315640-112320749	95.2516
ENSG00000135862	LAMC1	chr1:182992594-183114727	95.1242
ENSG00000127920	GNG11	chr7:93551010-93557922	95.0646
ENSG00000167792	NDUFV1	chr11:67374322-67380006	95.0537
ENSG00000123243	ITIH5	chr10:7601231-7708961	95.0174
ENSG00000129757	CDKN1C	chr11:2904442-2907111	94.828
ENSG00000077809	GTF2I	chr7:74071993-74306731	94.4167
ENSG00000173210	ABLIM3	chr5:148521045-148721365	94.3659
ENSG00000107798	LIPA	chr10:90973325-91174314	94.3225
ENSG00000141367	CLTC	chr17:57697218-57919616	94.2837
ENSG00000103335	PIEZO1	chr16:88772870-88851619	94.2321
ENSG00000173918	C1QTNF1	chr17:77015290-77045870	94.1915
ENSG00000143549	TPM3	chr1:154127783-154167124	94.1308
ENSG00000159140	SON	chr21:34876237-35349992	93.9316
ENSG00000116005	PCYOX1	chr2:70484517-70508323	93.8631
ENSG00000106624	AEBP1	chr7:44143959-44154161	93.8087
ENSG00000204387	C6orf48	chr6:31802384-31807541	93.7242
ENSG00000113916	BCL6	chr3:187416046-187463515	93.6436
ENSG00000125148	MT2A	chr16:56642110-56643409	93.6198
ENSG00000110958	PTGES3	chr12:57057126-57082159	93.5775
ENSG00000060138	YBX3	chr12:10851682-10875911	93.5255
ENSG00000114902	SPCS1	chr3:52529353-52742182	93.514
ENSG00000127954	STEAP4	chr7:87834432-87936206	93.3946
ENSG00000152601	MBNL1	chr3:151961616-152214602	93.1266
ENSG00000174903	RAB1B	chr11:66036003-66056641	93.0526
ENSG00000136235	GPNMB	chr7:23275585-23314727	93.0376
ENSG00000143149	ALDH9A1	chr1:165631452-165679205	92.9818
ENSG00000133317	LGALS12	chr11:63273555-63284246	92.6437
ENSG00000172216	CEBPB	chr20:48807375-48809212	92.5652
ENSG00000182220	ATP6AP2	chrX:40440145-40465889	92.5572
ENSG00000188243	COMMD6	chr13:76099349-76123575	92.5321
ENSG00000100664	EIF5	chr14:103799880-103811362	92.2629
ENSG00000162368	CMPK1	chr1:47799468-47844511	92.0433
ENSG00000116132	PRRX1	chr1:170631868-170708560	91.9007
ENSG00000138085	ATRAID	chr2:27422454-27440046	91.6914
ENSG00000149564	ESAM	chr11:124617367-124635832	91.6688
ENSG00000182196	ARL6IP4	chr12:123405497-123467456	91.6317
ENSG00000105438	KDELR1	chr19:48885826-48894810	91.5833
ENSG00000160691	SHC1	chr1:154929501-154946871	91.5801
ENSG00000136240	KDELR2	chr7:6448756-6524873	91.4898
ENSG00000159674	SPON2	chr4:1160719-1202750	91.4258
ENSG00000100242	SUN2	chr22:39101727-39190203	91.1074
ENSG00000002834	LASP1	chr17:37026111-37078023	91.0616
ENSG00000104388	RAB2A	chr8:61429415-61536186	90.9252
ENSG00000113721	PDGFRB	chr5:149493399-149535435	90.9234
ENSG00000174307	PHLDA3	chr1:201434619-201438365	90.8663
ENSG00000147872	PLIN2	chr9:19108372-19149288	90.8051
ENSG00000125971	DYNLRB1	chr20:33104213-33128762	90.7701
ENSG00000105640	RPL18A	chr19:17970684-17974962	90.6465
ENSG00000173660	UQCRH	chr1:46769302-46782448	90.6065
ENSG00000146278	PNRC1	chr6:89790469-89794879	90.5704
ENSG00000113296	THBS4	chr5:79287133-79379477	90.4259
ENSG00000164828	SUN1	chr7:855527-936073	90.3331
ENSG00000130175	PRKCSH	chr19:11531271-11561783	90.1517
ENSG00000170525	PFKFB3	chr10:6186880-6277495	89.975
ENSG00000129559	NEDD8	chr14:24641061-24708448	89.9665
ENSG00000138668	HNRNPD	chr4:83273650-83305180	89.9307
ENSG00000100836	PABPN1	chr14:23654524-23795394	89.7151
ENSG00000180879	SSR4	chrX:153051220-153063960	89.4881
ENSG00000079819	EPB41L2	chr6:131160486-131384462	89.4102
ENSG00000129353	SLC44A2	chr19:10713132-10755235	89.3507
ENSG00000107438	PDLIM1	chr10:96997328-97050781	89.1305
ENSG00000172137	CALB2	chr16:71392615-71424341	89.0967
ENSG00000112081	SRSF3	chr6:36562144-36573377	89.0812
ENSG00000162511	LAPTM5	chr1:31205315-31230667	89.03
ENSG00000181061	HIGD1A	chr3:42734154-42846023	88.9473
ENSG00000215021	PHB2	chr12:7072407-7178336	88.8149
ENSG00000086598	TMED2	chr12:124066766-124083116	88.6449
ENSG00000050405	LIMA1	chr12:50569570-50677329	88.6176
ENSG00000159840	ZYX	chr7:143078172-143220542	88.5692
ENSG00000008441	NFIX	chr19:13106421-13209610	88.5106
ENSG00000171530	TBCA	chr5:76986990-77164604	88.4827
ENSG00000090621	PABPC4	chr1:40026487-40042462	88.4245
ENSG00000102024	PLS3	chrX:114752489-114885181	88.4015
ENSG00000136521	NDUFB5	chr3:179322477-179345435	88.3991
ENSG00000111328	CDK2AP1	chr12:123636866-123756881	88.3906
ENSG00000013441	CLK1	chr2:201717731-201729422	88.3016
ENSG00000114779	ABHD14B	chr3:51989329-52023213	88.2898
ENSG00000073060	SCARB1	chr12:125261401-125367214	88.2099
ENSG00000244734	HBB	chr11:5246693-5250625	88.1812
ENSG00000161281	COX7A1	chr19:36641823-36643771	88.1008
ENSG00000012822	CALCOCO1	chr12:54104902-54121529	88.0756
ENSG00000204370	SDHD	chr11:111895537-112095422	87.8835
ENSG00000162704	ARPC5	chr1:183592400-183604892	87.6646
ENSG00000171227	TMEM37	chr2:120187476-120196096	87.2584
ENSG00000114867	EIF4G1	chr3:183851806-184402546	87.214
ENSG00000136450	SRSF1	chr17:56066398-56084707	87.188
ENSG00000198467	TPM2	chr9:35681988-35691017	87.1821
ENSG00000269893	SNHG8	chr4:119199863-119200978	87.0782
ENSG00000125733	TRIP10	chr19:6737935-6751537	86.9613
ENSG00000105698	USF2	chr19:35759880-35770724	86.6688
ENSG00000188257	PLA2G2A	chr1:20301924-20306932	86.6383
ENSG00000085733	CTTN	chr11:70116805-70282690	86.6354
ENSG00000000971	CFH	chr1:196621007-196716634	86.5469
ENSG00000186350	RXRA	chr9:137208943-137332431	86.5279
ENSG00000108219	TSPAN14	chr10:82213921-82295698	86.5075
ENSG00000232187	FTH1P7	chr13:23270161-23270713	86.4355
ENSG00000143384	MCL1	chr1:150547031-150552066	86.3732
ENSG00000197256	KANK2	chr19:11274942-11308467	86.3706
ENSG00000010319	SEMA3G	chr3:52467068-52479101	86.2778
ENSG00000225733	FGD5-AS1	chr3:14860468-15106842	86.2421
ENSG00000128245	YWHAH	chr22:32329506-32353590	86.1463
ENSG00000160014	CALM3	chr19:46984052-47114050	86.0415
ENSG00000147140	NONO	chrX:70503041-70521018	86.0018
ENSG00000182149	IST1	chr16:71879893-71962913	85.9408
ENSG00000173267	SNCG	chr10:88695296-88784489	85.9127
ENSG00000104824	HNRNPL	chr19:39306061-39342987	85.9061
ENSG00000120438	TCP1	chr6:160090088-160210781	85.8896
ENSG00000144579	CTDSP1	chr2:219262978-219270664	85.7536
ENSG00000138029	HADHB	chr2:26413503-26513336	85.6735
ENSG00000107281	NPDC1	chr9:139933921-139940655	85.6307
ENSG00000170906	NDUFA3	chr19:54606035-54635140	85.5746
ENSG00000113269	RNF130	chr5:179338650-179499118	85.566
ENSG00000125995	ROMO1	chr20:34213952-34288906	85.4518
ENSG00000175166	PSMD2	chr3:183851806-184402546	85.352
ENSG00000125743	SNRPD2	chr19:46190711-46207247	85.2763
ENSG00000023191	RNH1	chr11:494511-507300	85.1342
ENSG00000182117	NOP10	chr15:34633916-34635378	85.0525
ENSG00000058668	ATP2B4	chr1:203595688-203713209	85.0248
ENSG00000067082	KLF6	chr10:3818187-3827473	85.0223
ENSG00000136436	CALCOCO2	chr17:46908349-46943884	84.7857
ENSG00000246705	H2AFJ	chr12:14927269-14930936	84.6546
ENSG00000067225	PKM	chr15:72491369-72524164	84.5995
ENSG00000136960	ENPP2	chr8:120569325-120685693	84.5545
ENSG00000213088	DARC	chr1:159141398-159177763	84.3848
ENSG00000213465	ARL2	chr11:64781584-64808044	84.3283
ENSG00000166681	NGFRAP1	chrX:102631267-102633005	84.2055
ENSG00000129657	SEC14L1	chr17:75082797-75213179	84.1424
ENSG00000166333	ILK	chr11:6624871-6633898	84.114
ENSG00000235912	RP1-159A19.3	chr1:27975929-27976121	84.0901
ENSG00000188612	SUMO2	chr17:73131342-73179078	83.876
ENSG00000186010	NDUFA13	chr19:19623226-19648390	83.8198
ENSG00000160932	LY6E	chr8:144063154-144105249	83.8197
ENSG00000110108	TMEM109	chr11:60680637-60720002	83.6463
ENSG00000092010	PSME1	chr14:24605366-24610797	83.6106
ENSG00000139112	GABARAPL1	chr12:10365056-10375727	83.5944
ENSG00000105379	ETFB	chr19:51848422-51872257	83.5612
ENSG00000241553	ARPC4	chr3:9791627-9896822	83.5237
ENSG00000120896	SORBS3	chr8:22298331-22433301	83.508
ENSG00000026508	CD44	chr11:35160416-35253949	83.4643
ENSG00000175215	CTDSP2	chr12:58213709-58240522	83.4437
ENSG00000155463	OXA1L	chr14:23171351-23241007	83.4015
ENSG00000179820	MYADM	chr19:54357834-54379691	83.1596
ENSG00000166741	NNMT	chr11:113930314-114227293	82.8679
ENSG00000182851	GPIHBP1	chr8:144295067-144299044	82.8588
ENSG00000099260	PALMD	chr1:100111498-100160097	82.7593
ENSG00000105887	MTPN	chr7:135611202-135662101	82.6121
ENSG00000170540	ARL6IP1	chr16:18792616-18813000	82.5799
ENSG00000153187	HNRNPU	chr1:244998623-245027844	82.5204
ENSG00000084754	HADHA	chr2:26413503-26513336	82.4764
ENSG00000110092	CCND1	chr11:69455854-69490184	82.4593
ENSG00000132432	SEC61G	chr7:54819942-54872621	82.3159
ENSG00000139684	ESD	chr13:47345390-47371367	82.1587
ENSG00000057608	GDI2	chr10:5807185-5884095	82.1246
ENSG00000166295	ANAPC16	chr10:73856277-73995618	82.023
ENSG00000206527	PTPLB	chr3:123209666-123304032	81.791
ENSG00000173113	TRMT112	chr11:64073043-64085556	81.6913
ENSG00000125356	NDUFA1	chrX:119004496-119010625	81.6824
ENSG00000072163	LIMS2	chr2:128395955-128439360	81.6117
ENSG00000253683	CTB-79E8.3	chr5:172068268-172124723	81.5628
ENSG00000174348	PODN	chr1:53527853-53551174	81.5207
ENSG00000135677	GNS	chr12:65107224-65153227	81.4298
ENSG00000198918	RPL39	chrX:118920466-118925606	81.2253
ENSG00000186654	PRR5	chr22:45064592-45258665	81.1123
ENSG00000138071	ACTR2	chr2:65454886-65498387	81.1061
ENSG00000130811	EIF3G	chr19:10216898-10230596	81.0261
ENSG00000135437	RDH5	chr12:56075329-56118489	80.9201
ENSG00000082153	BZW1	chr2:201542955-201688569	80.8395
ENSG00000104325	DECR1	chr8:90945563-91064320	80.8137
ENSG00000239264	TXNDC5	chr6:7727029-8102811	80.805
ENSG00000177733	HNRNPA0	chr5:137087074-137090039	80.8047
ENSG00000174021	GNG5	chr1:84964007-85040163	80.7184
ENSG00000067182	TNFRSF1A	chr12:6437922-6451280	80.6738
ENSG00000172053	QARS	chr3:49133364-49142553	80.6508
ENSG00000089693	MLF2	chr12:6857169-6880116	80.561
ENSG00000093144	ECHDC1	chr6:127609854-127664754	80.5402
ENSG00000131771	PPP1R1B	chr17:37782992-37792879	80.4998
ENSG00000149257	SERPINH1	chr11:75273100-75283828	80.4705
ENSG00000176978	DPP7	chr9:140004993-140009629	80.3953
ENSG00000072062	PRKACA	chr19:14202499-14228896	80.3894
ENSG00000104765	BNIP3L	chr8:26236774-26371608	80.3698
ENSG00000091527	CDV3	chr3:133292573-133309105	80.358
ENSG00000149115	TNKS1BP1	chr11:57067111-57092426	80.233
ENSG00000127603	MACF1	chr1:39546987-39952849	80.166
ENSG00000122034	GTF3A	chr13:27998680-28024739	80.0932
ENSG00000056998	GYG2	chrX:2746828-2800859	80.0285
ENSG00000129596	CDO1	chr5:115140429-115152651	80.0067
ENSG00000167434	CA4	chr17:58227296-58248260	79.9697
ENSG00000123080	CDKN2C	chr1:51426416-51440305	79.9253
ENSG00000147257	GPC3	chrX:132669772-133119922	79.8857
ENSG00000128524	ATP6V1F	chr7:128470430-128550773	79.8502
ENSG00000156411	C14orf2	chr14:104378624-104394606	79.6391
ENSG00000171490	RSL1D1	chr16:11929055-11945442	79.5744
ENSG00000081154	PCNP	chr3:101292938-101313281	79.5701
ENSG00000107738	C10orf54	chr10:73156690-73575702	79.5215
ENSG00000168036	CTNNB1	chr3:41236327-42003922	79.384
ENSG00000138674	SEC31A	chr4:83739813-83934079	79.3633
ENSG00000137509	PRCP	chr11:82534543-82782965	79.311
ENSG00000100632	ERH	chr14:69846847-69929105	79.1868
ENSG00000137409	MTCH1	chr6:36935916-36954074	79.1839
ENSG00000177410	ZFAS1	chr20:47835883-47905797	79.1319
ENSG00000103769	RAB11A	chr15:65903703-66184329	79.0367
ENSG00000162735	PEX19	chr1:160185504-160256138	78.989
ENSG00000182944	EWSR1	chr22:29655840-29696515	78.9334
ENSG00000100605	ITPK1	chr14:93403258-93582665	78.8477
ENSG00000124299	PEPD	chr19:33877855-34012700	78.8178
ENSG00000148926	ADM	chr11:10326226-10328944	78.7646
ENSG00000025434	NR1H3	chr11:47260852-47290396	78.6474
ENSG00000240972	MIF	chr22:24198613-24241117	78.5675
ENSG00000187244	BCAM	chr19:45312327-45324673	78.4894
ENSG00000130770	ATPIF1	chr1:28562619-28573417	78.4256
ENSG00000232472	EEF1B2P3	chrX:24712035-25015103	78.0876
ENSG00000245910	SNHG6	chr8:67782983-67838633	78.0357
ENSG00000183255	PTTG1IP	chr21:46269499-46293752	78.0113
ENSG00000134824	FADS2	chr11:61447904-61634826	78.0091
ENSG00000204256	BRD2	chr6:32902405-32949282	77.9816
ENSG00000015479	MATR3	chr5:138282408-138667360	77.764
ENSG00000124225	PMEPA1	chr20:56223447-56286592	77.7434
ENSG00000204642	HLA-F	chr6:29690551-29716826	77.7106
ENSG00000140092	FBLN5	chr14:92335755-92414331	77.6671
ENSG00000160408	ST6GALNAC6	chr9:130628758-130667687	77.5837
ENSG00000145337	PYURF	chr4:89442135-89629693	77.5751
ENSG00000120727	PAIP2	chr5:138677275-138720242	77.5139
ENSG00000069122	GPR116	chr6:46820248-46922680	77.4846
ENSG00000150459	SAP18	chr13:21714652-21723221	77.4507
ENSG00000204435	CSNK2B	chr6:31629005-31641553	77.2754
ENSG00000035403	VCL	chr10:75757871-75879918	77.1209
ENSG00000142949	PTPRF	chr1:43990857-44089343	77.0733
ENSG00000101856	PGRMC1	chrX:118370215-118378429	77.0619
ENSG00000109180	OCIAD1	chr4:48807228-48863834	77.0473
ENSG00000137312	FLOT1	chr6:30695485-30710510	76.8522
ENSG00000149932	TMEM219	chr16:29952205-29984373	76.7838
ENSG00000163902	RPN1	chr3:128338816-128399918	76.699
ENSG00000101558	VAPA	chr18:9913998-9960018	76.6431
ENSG00000146701	MDH2	chr7:75677368-75696826	76.5852
ENSG00000011304	PTBP1	chr19:797074-812327	76.5007
ENSG00000112531	QKI	chr6:163835031-163999628	76.4808
ENSG00000100568	VTI1B	chr14:68086514-68162531	76.3088
ENSG00000140990	NDUFB10	chr16:2009508-2011976	76.2569
ENSG00000160888	IER2	chr19:13261228-13265722	76.2551
ENSG00000167397	VKORC1	chr16:31085742-31107301	76.2449
ENSG00000196419	XRCC6	chr22:42017122-42060044	76.1744
ENSG00000105404	RABAC1	chr19:42460832-42463542	76.151
ENSG00000159692	CTBP1	chr4:1205235-1282079	76.1489
ENSG00000124570	SERPINB6	chr6:2948392-2972090	76.101
ENSG00000152270	PDE3B	chr11:14665268-14892350	76.0349
ENSG00000130724	CHMP2A	chr19:59062932-59066491	75.9923
ENSG00000232112	TMA7	chr3:48473573-48488060	75.9257
ENSG00000183087	GAS6	chr13:114518602-114567046	75.8337
ENSG00000171206	TRIM8	chr10:104404252-104418164	75.8104
ENSG00000183726	TMEM50A	chr1:25568727-25756683	75.8029
ENSG00000243927	MRPS6	chr21:35445523-35732332	75.6337
ENSG00000099785	MARCH2	chr19:8478153-8503901	75.5992
ENSG00000141295	SCRN2	chr17:45908992-45918699	75.4379
ENSG00000172428	MYEOV2	chr2:241065979-241076224	75.3914
ENSG00000180354	MTURN	chr7:30174425-30202378	75.3803
ENSG00000102882	MAPK3	chr16:30125425-30134827	75.3695
ENSG00000088247	KHSRP	chr19:6413358-6424805	75.332
ENSG00000132824	SERINC3	chr20:43124861-43150750	75.3248
ENSG00000111237	VPS29	chr12:110928901-111021125	75.2625
ENSG00000138760	SCARB2	chr4:77079889-77135046	75.2394
ENSG00000189060	H1F0	chr22:38201113-38203442	75.2078
ENSG00000118564	FBXL5	chr4:15606161-15739936	75.1435
ENSG00000140374	ETFA	chr15:76352177-76603813	75.0803
ENSG00000071127	WDR1	chr4:10075962-10118573	75.0162
ENSG00000182534	MXRA7	chr17:74668023-74707098	74.9281
ENSG00000112964	GHR	chr5:42423878-42721979	74.91
ENSG00000090520	DNAJB11	chr3:186256229-186315061	74.9042
ENSG00000051108	HERPUD1	chr16:56965959-56977798	74.7948
ENSG00000169744	LDB2	chr4:16402052-16900432	74.6946
ENSG00000142864	SERBP1	chr1:67873492-67896098	74.604
ENSG00000162618	ELTD1	chr1:79355448-79472403	74.4705
ENSG00000170348	TMED10	chr14:75548821-75643334	74.4234
ENSG00000110077	MS4A6A	chr11:59939080-59952139	74.3216
ENSG00000175602	CCDC85B	chr11:65657874-65659105	74.2759
ENSG00000198406	BZW1P2	chr3:115521234-117716439	74.2102
ENSG00000241081	RP11-488C13.1	chr14:77352719-77353093	74.1428
ENSG00000205544	TMEM256	chr17:7283852-7307456	74.1128
ENSG00000143387	CTSK	chr1:150768683-150780799	74.028
ENSG00000103876	FAH	chr15:80444831-80479288	73.8783
ENSG00000204463	BAG6	chr6:31606804-31625987	73.8625
ENSG00000126217	MCF2L	chr13:113548691-113754053	73.8398
ENSG00000109390	NDUFC1	chr4:140187316-140397763	73.7125
ENSG00000180817	PPA1	chr10:71962585-71993667	73.6564
ENSG00000213625	LEPROT	chr1:65886247-66107242	73.6302
ENSG00000176046	NUPR1	chr16:28548605-28550495	73.6042
ENSG00000044574	HSPA5	chr9:127997131-128003609	73.5504
ENSG00000134294	SLC38A2	chr12:46751971-46767561	73.5303
ENSG00000101220	C20orf27	chr20:3734154-3749034	73.4181
ENSG00000168056	LTBP3	chr11:65306275-65326401	73.3629
ENSG00000106823	ECM2	chr9:95059639-95432547	73.2867
ENSG00000198898	CAPZA2	chr7:116451123-116562103	73.2518
ENSG00000132424	PNISR	chr6:99845926-99879249	73.1302
ENSG00000177954	RPS27	chr1:153963234-153964626	73.1069
ENSG00000004779	NDUFAB1	chr16:23592322-23607677	73.1006
ENSG00000086666	ZFAND6	chr15:80351909-80430735	72.9396
ENSG00000078808	SDF4	chr1:1152287-1167411	72.9359
ENSG00000142871	CYR61	chr1:86046443-86049645	72.931
ENSG00000127540	UQCR11	chr19:1576638-1605480	72.8604
ENSG00000132341	RAN	chr12:131356423-131362223	72.8338
ENSG00000213722	DDAH2	chr6:31694814-31707540	72.7956
ENSG00000105568	PPP2R1A	chr19:52693291-52734547	72.7653
ENSG00000125991	ERGIC3	chr20:34129769-34145405	72.7502
ENSG00000109861	CTSC	chr11:88026759-88070955	72.7265
ENSG00000079246	XRCC5	chr2:216972186-217071026	72.6709
ENSG00000115944	COX7A2L	chr2:42560685-42652228	72.6164
ENSG00000162733	DDR2	chr1:162601162-162757190	72.6115
ENSG00000179403	VWA1	chr1:1370240-1378262	72.4669
ENSG00000266402	SNORA76	chr17:62223329-62223836	72.3686
ENSG00000213366	GSTM2	chr1:110210643-110252171	72.3655
ENSG00000150938	CRIM1	chr2:36583068-36873230	72.3184
ENSG00000111676	ATN1	chr12:7033625-7051484	72.314
ENSG00000197744	PTMAP2	chr5:118173016-118324240	72.3041
ENSG00000135047	CTSL	chr9:90340433-90346308	72.2813
ENSG00000241978	AKAP2	chr9:112403067-112934792	72.2547
ENSG00000131507	NDFIP1	chr5:141488069-141534005	72.2489
ENSG00000133110	POSTN	chr13:38136719-38172981	72.2272
ENSG00000100906	NFKBIA	chr14:35870716-35873955	72.1119
ENSG00000242485	MRPL20	chr1:1334901-1342693	71.9643
ENSG00000164056	SPRY1	chr4:124317949-124324910	71.9358
ENSG00000149084	HSD17B12	chr11:43577985-43902276	71.929
ENSG00000168159	RNF187	chr1:228674761-228683467	71.9263
ENSG00000203485	INF2	chr14:105155942-105185942	71.9113
ENSG00000118523	CTGF	chr6:132269315-132398533	71.8228
ENSG00000138758	SEPT11	chr4:77870855-77961537	71.7777
ENSG00000100902	PSMA6	chr14:35514112-35786699	71.7314
ENSG00000170955	PRKCDBP	chr11:6340175-6341877	71.6965
ENSG00000102287	GABRE	chrX:151121595-151143152	71.6322
ENSG00000154096	THY1	chr11:119252487-119397374	71.3898
ENSG00000117362	APH1A	chr1:150237803-150253327	71.3237
ENSG00000089597	GANAB	chr11:62392297-62414104	71.3063
ENSG00000220205	VAMP2	chr17:8043789-8066864	71.1751
ENSG00000185236	RAB11B	chr19:8428172-8469318	71.1075
ENSG00000094963	FMO2	chr1:171154346-171196927	71.0846
ENSG00000114480	GBE1	chr3:81538849-81811312	71.0626
ENSG00000091136	LAMB1	chr7:107531414-107643700	71.0458
ENSG00000170801	HTRA3	chr4:8271491-8308838	70.9983
ENSG00000244687	UBE2V1	chr20:48697660-48770335	70.9712
ENSG00000101150	TPD52L2	chr20:62496595-62522898	70.9543
ENSG00000134825	TMEM258	chr11:61447904-61634826	70.9034
ENSG00000108639	SYNGR2	chr17:76164638-76169608	70.9004
ENSG00000100380	ST13	chr22:41220538-41253026	70.82
ENSG00000154133	ROBO4	chr11:124753586-124768396	70.7707
ENSG00000149485	FADS1	chr11:61447904-61634826	70.6809
ENSG00000004059	ARF5	chr7:127220671-127242198	70.6049
ENSG00000226976	COX6A1P2	chr6:37012606-37013177	70.5944
ENSG00000023734	STRAP	chr12:16035324-16056412	70.4054
ENSG00000120708	TGFBI	chr5:135364583-135399507	70.2729
ENSG00000127483	HP1BP3	chr1:21069153-21113816	70.2673
ENSG00000169976	SF3B5	chr6:144416017-144416754	70.207
ENSG00000151414	NEK7	chr1:198126092-198291550	70.1879
ENSG00000115561	CHMP3	chr2:86730553-87005164	70.1686
ENSG00000125810	CD93	chr20:23059985-23066977	70.1207
ENSG00000177731	FLII	chr17:18128900-18162230	70.1052
ENSG00000137497	NUMA1	chr11:71709586-71823826	70.0471
ENSG00000064601	CTSA	chr20:44517263-44540794	70.02
ENSG00000158186	MRAS	chr3:138066538-138124375	70.0086
ENSG00000249353	NPM1P27	chr5:92953774-93447404	69.9523
ENSG00000003402	CFLAR	chr2:201980826-202041410	69.9455
ENSG00000131828	PDHA1	chrX:19362010-19533379	69.8737
ENSG00000163541	SUCLG1	chr2:84650646-84687169	69.8723
ENSG00000131378	RFTN1	chr3:16306705-16555533	69.8601
ENSG00000213923	CSNK1E	chr22:38686696-38794934	69.8534
ENSG00000131370	SH3BP5	chr3:15295690-15382875	69.8427
ENSG00000133030	MPRIP	chr17:16945858-17140502	69.7741
ENSG00000123091	RNF11	chr1:51701942-51739127	69.7526
ENSG00000188186	LAMTOR4	chr7:99746529-99756338	69.7067
ENSG00000143420	ENSA	chr1:150573326-150602088	69.6823
ENSG00000105323	HNRNPUL1	chr19:41768400-41930910	69.6793
ENSG00000104695	PPP2CB	chr8:30631972-30671830	69.5147
ENSG00000120948	TARDBP	chr1:11072413-11085796	69.498
ENSG00000196735	HLA-DQA1	chr6:32595955-32614839	69.3318
ENSG00000157933	SKI	chr1:2160133-2241558	69.3015
ENSG00000143013	LMO4	chr1:87794150-87814606	69.2942
ENSG00000126709	IFI6	chr1:27992571-27998729	69.287
ENSG00000099864	PALM	chr19:708952-748329	69.2555
ENSG00000186469	GNG2	chr14:52292912-52446060	69.1042
ENSG00000185909	KLHDC8B	chr3:49209043-49213917	69.0627
ENSG00000142227	EMP3	chr19:48799713-48833810	68.9687
ENSG00000112514	CUTA	chr6:33378175-33386094	68.9597
ENSG00000158747	NBL1	chr1:19923472-19984945	68.8278
ENSG00000164346	NSA2	chr5:73923233-74072737	68.7829
ENSG00000079332	SAR1A	chr10:71907044-71930279	68.6712
ENSG00000169738	DCXR	chr17:79993011-79995608	68.6004
ENSG00000157916	RER1	chr1:2323266-2345236	68.5553
ENSG00000103018	CYB5B	chr16:69458427-69500169	68.5214
ENSG00000233016	SNHG7	chr9:139607021-139622636	68.4424
ENSG00000251562	MALAT1	chr11:65265232-65273940	68.3662
ENSG00000172201	ID4	chr6:19535174-19840915	68.3466
ENSG00000090238	YPEL3	chr16:30103634-30115437	68.279
ENSG00000119048	UBE2B	chr5:133706869-133727683	68.1202
ENSG00000100823	APEX1	chr14:20923349-20929771	68.0377
ENSG00000173269	MMRN2	chr10:88695296-88784489	68.0178
ENSG00000167315	ACAA2	chr18:47309868-47721463	67.9033
ENSG00000227591	RP1-28O10.1	chr1:209834708-209908295	67.8921
ENSG00000175826	CTDNEP1	chr17:7143332-7167302	67.8842
ENSG00000142507	PSMB6	chr17:4699438-4701790	67.8582
ENSG00000159388	BTG2	chr1:203274618-203278730	67.7719
ENSG00000142208	AKT1	chr14:105235685-105262088	67.6733
ENSG00000186642	PDE2A	chr11:72287184-72385635	67.6583
ENSG00000213639	PPP1CB	chr2:28974505-29093167	67.5937
ENSG00000198561	CTNND1	chr11:57480071-57587018	67.5508
ENSG00000131943	C19orf12	chr19:30191720-30206364	67.5342
ENSG00000164849	GPR146	chr7:1036621-1177896	67.514
ENSG00000122642	FKBP9	chr7:32535037-33102409	67.4078
ENSG00000175756	AURKAIP1	chr1:1309109-1310875	67.3932
ENSG00000233913	CTC-575D19.1	chr5:168043316-168044059	67.3732
ENSG00000069275	NUCKS1	chr1:205681946-205719404	67.3721
ENSG00000150753	CCT5	chr5:10250032-10267258	67.3271
ENSG00000120742	SERP1	chr3:150259780-150348222	67.3085
ENSG00000144381	HSPD1	chr2:198351304-198418423	67.3066
ENSG00000047346	FAM214A	chr15:52870038-53002014	67.2764
ENSG00000137210	TMEM14B	chr6:10747991-10979553	67.2683
ENSG00000254893	RP11-466P24.2	chr5:75377770-75649764	67.2271
ENSG00000266964	FXYD1	chr19:35615416-35645204	67.2039
ENSG00000131100	ATP6V1E1	chr22:18074901-18111584	67.1994
ENSG00000189043	NDUFA4	chr7:10971577-10979883	67.1988
ENSG00000126261	UBA2	chr19:34919256-34960853	67.0054
ENSG00000130208	APOC1	chr19:45417503-45422606	66.9661
ENSG00000213977	TAX1BP3	chr17:3566195-3599698	66.9298
ENSG00000112715	VEGFA	chr6:43737920-43754224	66.8849
ENSG00000099797	TECR	chr19:14625581-14676792	66.8095
ENSG00000149357	LAMTOR1	chr11:71709586-71823826	66.6228
ENSG00000162434	JAK1	chr1:65210777-65432187	66.6036
ENSG00000100711	ZFYVE21	chr14:104182066-104200005	66.4808
ENSG00000066322	ELOVL1	chr1:43829067-43833696	66.3973
ENSG00000099282	TSPAN15	chr10:71211228-71267425	66.3637
ENSG00000182636	NDN	chr15:23930564-23932450	66.3546
ENSG00000214022	REPIN1	chr7:150060865-150109558	66.3442
ENSG00000136938	ANP32B	chr9:100745642-100778225	66.3117
ENSG00000113013	HSPA9	chr5:137890570-137911133	66.3023
ENSG00000164054	SHISA5	chr3:48509196-48542259	66.2721
ENSG00000197614	MFAP5	chr12:8786962-8815484	66.2431
ENSG00000128789	PSMG2	chr18:12438888-12725739	66.1398
ENSG00000214078	CPNE1	chr20:34213952-34288906	66.0902
ENSG00000140575	IQGAP1	chr15:90931449-91045475	66.0518
ENSG00000075239	ACAT1	chr11:107879458-108018503	66.0346
ENSG00000164258	NDUFS4	chr5:52856462-52979168	65.9956
ENSG00000143418	CERS2	chr1:150898738-150948010	65.9316
ENSG00000134248	LAMTOR5	chr1:110905469-110974982	65.9236
ENSG00000176435	CLEC14A	chr14:38723307-38725574	65.8186
ENSG00000213928	IRF9	chr14:24612573-24636611	65.8147
ENSG00000065833	ME1	chr6:83920107-84140797	65.568
ENSG00000170248	PDCD6IP	chr3:33839843-33911194	65.5478
ENSG00000110717	NDUFS8	chr11:67798083-67804111	65.5357
ENSG00000096746	HNRNPH3	chr10:70042416-70167051	65.5041
ENSG00000095139	ARCN1	chr11:118307204-118473748	65.4919
ENSG00000162878	PKDCC	chr2:42275159-42285668	65.469
ENSG00000147853	AK3	chr9:4711154-4742043	65.3942
ENSG00000003756	RBM5	chr3:49977439-50226508	65.3576
ENSG00000143543	JTB	chr1:153931574-153950164	65.3523
ENSG00000106537	TSPAN13	chr7:16793159-16824161	65.3482
ENSG00000169418	NPR1	chr1:153651112-153666468	65.3265
ENSG00000122565	CBX3	chr7:26229546-26252976	65.2651
ENSG00000072210	ALDH3A2	chr17:19551448-19580911	65.1642
ENSG00000111786	SRSF9	chr12:120899470-120907596	65.1616
ENSG00000089006	SNX5	chr20:17922240-18039832	65.101
ENSG00000126561	STAT5A	chr17:40439564-40463961	65.0902
ENSG00000197965	MPZL1	chr1:167690428-167761156	65.074
ENSG00000107140	TESK1	chr9:35605366-35647096	65.003
ENSG00000025708	TYMP	chr22:50961996-50971009	64.9243
ENSG00000171867	PRNP	chr20:4666881-4682236	64.8989
ENSG00000119335	SET	chr9:131445702-131458679	64.892
ENSG00000206625	RNU6-1	chr15:68112041-68166204	64.8909
ENSG00000105402	NAPA	chr19:47987538-48018497	64.8509
ENSG00000160752	FDPS	chr1:155278538-155300905	64.8358
ENSG00000119318	RAD23B	chr9:110045417-110094475	64.8212
ENSG00000151914	DST	chr6:56322784-56819426	64.7943
ENSG00000160209	PDXK	chr21:45138974-45182188	64.7917
ENSG00000108848	LUC7L3	chr17:48796904-48833574	64.7451
ENSG00000041357	PSMA4	chr15:78832746-78841604	64.6977
ENSG00000089159	PXN	chr12:120639093-120703574	64.6655
ENSG00000164040	PGRMC2	chr4:129190396-129209984	64.6034
ENSG00000175334	BANF1	chr11:65764015-65771620	64.5315
ENSG00000198408	MGEA5	chr10:103544199-103578696	64.5273
ENSG00000233270	SNRPEP4	chr19:5576670-5576949	64.4962
ENSG00000125304	TM9SF2	chr13:100153670-100216260	64.4354
ENSG00000166888	STAT6	chr12:57482676-57607134	64.3965
ENSG00000132716	DCAF8	chr1:160185504-160256138	64.3382
ENSG00000239697	TNFSF12	chr17:7452207-7464925	64.3283
ENSG00000159069	FBXW5	chr9:139834886-139839148	64.2556
ENSG00000234741	GAS5	chr1:173832385-173872687	64.2272
ENSG00000272888	AC013394.2	chr15:93425936-93571237	64.2003
ENSG00000155876	RRAGA	chr9:19049371-19051019	64.15
ENSG00000084623	EIF3I	chr1:32674694-32697205	64.0684
ENSG00000095066	HOOK2	chr19:12873816-12985765	64.015
ENSG00000173482	PTPRM	chr18:7566779-8406951	64.0043
ENSG00000186205	MARCH1	chr1:220960100-220987735	63.9621
ENSG00000128463	EMC4	chr15:34517199-34522357	63.9501
ENSG00000189343	RPS2P46	chr17:19342455-19364308	63.9228
ENSG00000186298	PPP1CC	chr12:111157484-111180744	63.7799
ENSG00000168610	STAT3	chr17:40465341-40540586	63.6534
ENSG00000100567	PSMA3	chr14:58466452-58764857	63.6331
ENSG00000160075	SSU72	chr1:1477052-1510249	63.6328
ENSG00000147274	RBMX	chrX:135923089-135962923	63.6028
ENSG00000136930	PSMB7	chr9:127115744-127177723	63.5345
ENSG00000064666	CNN2	chr19:1026297-1039068	63.453
ENSG00000232388	LINC00493	chr20:18548063-18550207	63.4515
ENSG00000126214	KLC1	chr14:104019757-104181841	63.32
ENSG00000143753	DEGS1	chr1:224363457-224381143	63.2978
ENSG00000090013	BLVRB	chr19:40953695-40971747	63.2635
ENSG00000251322	SHANK3	chr22:51112842-51171726	63.1161
ENSG00000215301	DDX3X	chrX:41192650-41223725	63.0955
ENSG00000178449	COX14	chr12:50505761-50561288	63.0913
ENSG00000240801	AC132217.4	chr11:2150341-2182571	63.0858
ENSG00000214389	RPS3AP26	chr7:97881690-98030380	63.0798
ENSG00000168894	RNF181	chr2:85822847-85824736	63.0664
ENSG00000088387	DOCK9	chr13:99445740-99738879	62.9944
ENSG00000074181	NOTCH3	chr19:15270443-15311792	62.9193
ENSG00000042753	AP2S1	chr19:47341392-47354249	62.8473
ENSG00000184076	UQCR10	chr22:30163357-30166402	62.8438
ENSG00000172638	EFEMP2	chr11:65590492-65641063	62.753
ENSG00000050628	PTGER3	chr1:71318035-71513491	62.7356
ENSG00000123240	OPTN	chr10:12938626-13180291	62.7046
ENSG00000163710	PCOLCE2	chr3:142534763-142608045	62.6795
ENSG00000185818	NAT8L	chr4:2061238-2070816	62.6335
ENSG00000128951	DUT	chr15:48604549-48635570	62.606
ENSG00000128595	CALU	chr7:128379345-128411861	62.6039
ENSG00000022840	RNF10	chr12:120941076-121015397	62.5994
ENSG00000119801	YPEL5	chr2:30369806-30383399	62.5943
ENSG00000135624	CCT7	chr2:73460547-73480149	62.5866
ENSG00000054148	PHPT1	chr9:139743175-139755249	62.4567
ENSG00000058262	SEC61A1	chr3:127770483-128127485	62.4332
ENSG00000178952	TUFM	chr16:28853731-28857729	62.4135
ENSG00000115694	STK25	chr2:242295657-242449145	62.3766
ENSG00000101421	CHMP4B	chr20:32399109-32442172	62.3724
ENSG00000134954	ETS1	chr11:128328655-128457453	62.3713
ENSG00000124193	SRSF6	chr20:42086567-42092245	62.3568
ENSG00000117298	ECE1	chr1:21543739-21671997	62.3128
ENSG00000060237	WNK1	chr12:861758-1020618	62.253
ENSG00000129625	REEP5	chr5:112043194-112258236	62.2127
ENSG00000244038	DDOST	chr1:20959947-20988000	62.123
ENSG00000141002	TCF25	chr16:89939999-90005169	62.0899
ENSG00000119705	SLIRP	chr14:78174413-78236085	62.0885
ENSG00000143870	PDIA6	chr2:10861774-10978103	62.075
ENSG00000179632	MAF1	chr8:145153535-145173218	62.0707
ENSG00000060762	MPC1	chr6:166778406-166796486	62.0213
ENSG00000082781	ITGB5	chr3:124480794-124620265	62.0144
ENSG00000204301	NOTCH4	chr6:32158542-32191844	62.0083
ENSG00000167671	UBXN6	chr19:4402658-4457819	62.0062
ENSG00000182154	MRPL41	chr9:140445650-140447007	61.9998
ENSG00000179091	CYC1	chr8:145149929-145152428	61.9735
ENSG00000170142	UBE2E1	chr3:23845514-23932807	61.9535
ENSG00000179262	RAD23A	chr19:13056668-13064456	61.8429
ENSG00000065809	FAM107B	chr10:14560555-14816896	61.8135
ENSG00000152291	TGOLN2	chr2:85545146-85555548	61.8089
ENSG00000121858	TNFSF10	chr3:172223297-172241297	61.7824
ENSG00000148484	RSU1	chr10:16632609-16859527	61.6937
ENSG00000117758	STX12	chr1:28099693-28150963	61.6229
ENSG00000122033	MTIF3	chr13:27998680-28024739	61.5805
ENSG00000243147	MRPL33	chr2:27994583-28561768	61.5351
ENSG00000196549	MME	chr3:154741912-154901497	61.4409
ENSG00000088367	EPB41L1	chr20:34679425-34820721	61.4053
ENSG00000127922	SHFM1	chr7:96110937-96339203	61.3928
ENSG00000118418	HMGN3	chr6:79910961-79946514	61.3718
ENSG00000184887	BTBD6	chr14:105675622-105864484	61.3709
ENSG00000175582	RAB6A	chr11:73386682-73472182	61.3646
ENSG00000168734	PKIG	chr20:43160425-43280874	61.3538
ENSG00000050426	LETMD1	chr12:51441744-51454207	61.3421
ENSG00000100219	XBP1	chr22:29190542-29196585	61.3241
ENSG00000100353	EIF3D	chr22:36906896-36925483	61.2389
ENSG00000090487	SPG21	chr15:65255361-65282648	61.2336
ENSG00000136888	ATP6V1G1	chr9:117350025-117360653	61.1134
ENSG00000112559	MDFI	chr6:41604619-41621984	61.1079
ENSG00000184990	SIVA1	chr14:105219436-105234831	61.1026
ENSG00000170458	CD14	chr5:140011312-140013286	61.0603
ENSG00000197102	DYNC1H1	chr14:102430864-102532565	60.9776
ENSG00000077147	TM9SF3	chr10:98277865-98347209	60.9078
ENSG00000129009	ISLR	chr15:74445140-74471567	60.7683
ENSG00000171604	CXXC5	chr5:139026883-139063467	60.6892
ENSG00000166147	FBN1	chr15:48700502-48938046	60.6139
ENSG00000159658	EFCAB14	chr1:47098408-47184824	60.4984
ENSG00000184601	C14orf180	chr14:104941014-105071984	60.4477
ENSG00000135387	CAPRIN1	chr11:34073229-34122703	60.3992
ENSG00000121774	KHDRBS1	chr1:32479429-32568467	60.3697
ENSG00000156298	TSPAN7	chrX:37208527-38548169	60.2384
ENSG00000128989	ARPP19	chr15:52839241-52862080	60.1564
ENSG00000129226	CD68	chr17:7465191-7536700	60.1536
ENSG00000087365	SF3B2	chr11:65818199-65837090	60.1258
ENSG00000070404	FSTL3	chr19:676391-683385	60.1146
ENSG00000117616	C1orf63	chr1:25568727-25756683	60.0326
ENSG00000126088	UROD	chr1:45477818-45481247	60.0232
ENSG00000136527	TRA2B	chr3:185633693-185655924	59.9817
ENSG00000170043	TRAPPC1	chr17:7825176-7853236	59.9715
ENSG00000178035	IMPDH2	chr3:49061757-49067139	59.8572
ENSG00000122756	CNTFR	chr9:34551429-34590121	59.8299
ENSG00000106028	SSBP1	chr7:141404137-141488440	59.7734
ENSG00000149499	EML3	chr11:62369689-62382592	59.7519
ENSG00000120306	CYSTM1	chr5:139554226-139682706	59.7141
ENSG00000130592	LSP1	chr11:1874199-1913497	59.6905
ENSG00000241685	ARPC1A	chr7:98923520-99063954	59.6594
ENSG00000155130	MARCKS	chr6:114178540-114184648	59.6376
ENSG00000167244	IGF2	chr11:2150341-2182571	59.6086
ENSG00000177879	AP3S1	chr5:115163892-115249778	59.5592
ENSG00000182768	NGRN	chr15:90792761-90816463	59.4828
ENSG00000136810	TXN	chr9:113006090-113018920	59.4531
ENSG00000183011	LSMD1	chr17:7760002-7816078	59.411
ENSG00000125970	RALY	chr20:32570857-32700138	59.4099
ENSG00000160221	C21orf33	chr21:45553486-45565605	59.3287
ENSG00000127125	PPCS	chr1:42895999-43120335	59.3004
ENSG00000197858	GPAA1	chr8:145137492-145141119	59.2133
ENSG00000135720	DYNC1LI2	chr16:66754795-66788643	59.1023
ENSG00000182492	BGN	chrX:152710177-152775012	59.0122
ENSG00000161544	CYGB	chr17:74523437-74553765	58.9926
ENSG00000198355	PIM3	chr22:50354160-50357728	58.977
ENSG00000089737	DDX24	chr14:94517265-94547591	58.9433
ENSG00000097033	SH3GLB1	chr1:87170258-87213867	58.9144
ENSG00000103266	STUB1	chr16:730223-734529	58.8779
ENSG00000147162	OGT	chrX:70752932-70795747	58.8079
ENSG00000267272	LINC01140	chr1:87380330-87634884	58.8054
ENSG00000167543	TP53I13	chr17:27887564-28513493	58.7985
ENSG00000166337	TAF10	chr11:6624871-6633898	58.7513
ENSG00000102316	MAGED2	chrX:54834031-54842445	58.7142
ENSG00000132485	ZRANB2	chr1:71514537-71546980	58.6773
ENSG00000108294	PSMB3	chr17:36908988-36920484	58.6531
ENSG00000169813	HNRNPF	chr10:43881064-43904614	58.6408
ENSG00000110719	TCIRG1	chr11:67806482-67888911	58.6377
ENSG00000196715	VKORC1L1	chr7:65338253-65424550	58.4984
ENSG00000173599	PC	chr11:66615703-66725847	58.4748
ENSG00000145675	PIK3R1	chr5:67511547-67597649	58.3721
ENSG00000205352	PRR13	chr12:53835388-53893847	58.3332
ENSG00000107551	RASSF4	chr10:45306471-45491339	58.2641
ENSG00000010244	ZNF207	chr17:30593194-30708905	58.1752
ENSG00000160948	VPS28	chr8:145648999-145653931	58.0911
ENSG00000138279	ANXA7	chr10:75134858-75173834	58.0846
ENSG00000162191	UBXN1	chr11:62443969-62446567	58.0609
ENSG00000130414	NDUFA10	chr2:240831866-240964819	58.0589
ENSG00000172380	GNG12	chr1:68167148-68698803	58.0242
ENSG00000130706	ADRM1	chr20:60877148-60942368	57.9881
ENSG00000103811	CTSH	chr15:79213399-79241916	57.9357
ENSG00000237350	CDC42P6	chr4:22694536-22821198	57.8968
ENSG00000173726	TOMM20	chr1:235272650-235292251	57.8393
ENSG00000103502	CDIPT	chr16:29869677-29879371	57.8327
ENSG00000113328	CCNG1	chr5:162864574-162887146	57.8235
ENSG00000130702	LAMA5	chr20:60877148-60942368	57.8074
ENSG00000091409	ITGA6	chr2:173292081-173489823	57.8071
ENSG00000143158	MPC2	chr1:167885966-168045081	57.7341
ENSG00000198624	CCDC69	chr5:150560612-150650001	57.6275
ENSG00000184752	NDUFA12	chr12:95290830-95397546	57.6021
ENSG00000129467	ADCY4	chr14:24787554-24809251	57.5105
ENSG00000138385	SSB	chr2:170648442-170681441	57.5044
ENSG00000184840	TMED9	chr5:177019158-177023125	57.3495
ENSG00000113712	CSNK1A1	chr5:148871759-148931007	57.2801
ENSG00000134046	MBD2	chr18:51679078-51751158	57.274
ENSG00000141959	PFKL	chr21:45719933-45747259	57.2617
ENSG00000135441	BLOC1S1	chr12:56075329-56118489	57.2402
ENSG00000198189	HSD17B11	chr4:88224940-88312538	57.2353
ENSG00000197226	TBC1D9B	chr5:179224596-179334859	57.2131
ENSG00000132002	DNAJB1	chr19:14625581-14676792	57.1758
ENSG00000115128	SF3B14	chr2:24290453-24299313	57.1581
ENSG00000105856	HBP1	chr7:106809405-107218906	57.1025
ENSG00000168291	PDHB	chr3:58413356-58419584	57.0515
ENSG00000157227	MMP14	chr14:23305765-23318236	57.0341
ENSG00000134817	APLNR	chr11:57001050-57004709	57.0233
ENSG00000005243	COPZ2	chr17:46103532-46115392	56.8863
ENSG00000169021	UQCRFS1	chr19:29698172-29706722	56.863
ENSG00000178922	HYI	chr1:43855552-43922666	56.7401
ENSG00000149547	EI24	chr11:125439111-125551018	56.6712
ENSG00000159352	PSMD4	chr1:151227178-151239955	56.6441
ENSG00000198931	APRT	chr16:88875746-88878352	56.6003
ENSG00000141551	CSNK1D	chr17:80186272-80231607	56.5366
ENSG00000069535	MAOB	chrX:43625857-43741693	56.5117
ENSG00000108179	PPIF	chr10:81107224-81115093	56.4912
ENSG00000162496	DHRS3	chr1:12627938-12677737	56.4286
ENSG00000134851	TMEM165	chr4:56262123-56414056	56.4088
ENSG00000020181	GPR124	chr8:37641708-37707422	56.3364
ENSG00000213619	NDUFS3	chr11:47487495-47606114	56.296
ENSG00000105088	OLFM2	chr19:9964393-10047228	56.2652
ENSG00000185627	PSMD13	chr11:215457-252983	56.211
ENSG00000243199	RP11-408P14.1	chr4:66185280-66563747	56.1964
ENSG00000162430	SEPN1	chr1:26126666-26185903	56.1859
ENSG00000089053	ANAPC5	chr12:121746047-121837699	56.1797
ENSG00000130726	TRIM28	chr19:59055457-59062089	56.1728
ENSG00000197451	HNRNPAB	chr5:177631507-177659792	56.1691
ENSG00000064205	WISP2	chr20:43285091-43379675	56.1666
ENSG00000165804	ZNF219	chr14:21484921-21572881	56.0601
ENSG00000184900	SUMO3	chr21:46225531-46238694	56.0261
ENSG00000126878	AIF1L	chr9:133971862-133998539	55.9728
ENSG00000170522	ELOVL6	chr4:110967001-111120355	55.9075
ENSG00000129103	SUMF2	chr7:56131694-56148363	55.9054
ENSG00000249915	PDCD6	chr5:271735-438406	55.877
ENSG00000180447	GAS1	chr9:89559278-89562104	55.8574
ENSG00000065150	IPO5	chr13:98605911-98676551	55.7536
ENSG00000005882	PDK2	chr17:48172100-48207246	55.7189
ENSG00000131174	COX7B	chrX:77154934-77162870	55.7145
ENSG00000102931	ARL2BP	chr16:57279009-57287516	55.6738
ENSG00000137693	YAP1	chr11:101981191-102104154	55.6691
ENSG00000233830	EIF4HP1	chr7:27497781-27498468	55.6524
ENSG00000178878	APOLD1	chr12:12878850-12982915	55.6462
ENSG00000203879	GDI1	chrX:153665265-153671814	55.6068
ENSG00000163399	ATP1A1	chr1:116915289-116961244	55.5847
ENSG00000241399	CD302	chr2:160568999-160761260	55.5795
ENSG00000007944	MYLIP	chr6:16129355-16148479	55.5283
ENSG00000184640	SEPT9	chr17:75253818-75496678	55.5216
ENSG00000131495	NDUFA2	chr5:140018324-140042064	55.5207
ENSG00000179295	PTPN11	chr12:112842993-112947717	55.4926
ENSG00000007168	PAFAH1B1	chr17:2496503-2588909	55.432
ENSG00000149823	VPS51	chr11:64851694-64883856	55.427
ENSG00000166575	TMEM135	chr11:86748885-87035401	55.4223
ENSG00000100225	FBXO7	chr22:32870662-32894818	55.4012
ENSG00000112146	FBXO9	chr6:52866076-52965671	55.37
ENSG00000185088	RPS27L	chr15:63413998-63450220	55.3404
ENSG00000072110	ACTN1	chr14:69340859-69446157	55.3206
ENSG00000105968	H2AFV	chr7:44866389-44887682	55.2343
ENSG00000168522	FNTA	chr8:42704779-42940931	55.2297
ENSG00000170876	TMEM43	chr3:14166439-14242619	55.2
ENSG00000087191	PSMC5	chr17:61896792-61909379	55.1357
ENSG00000224864	CTC-260E6.2	chr19:20188802-20432114	55.093
ENSG00000196628	TCF4	chr18:52889561-53332018	55.0899
ENSG00000132142	ACACA	chr17:35441922-35766909	55.0286
ENSG00000118705	RPN2	chr20:35729628-35870022	54.9891
ENSG00000164292	RHOBTB3	chr5:95036952-95160087	54.9414
ENSG00000109686	SH3D19	chr4:152020724-152246784	54.9413
ENSG00000111481	COPZ1	chr12:54624723-54745633	54.9168
ENSG00000123131	PRDX4	chrX:23682378-23704516	54.9106
ENSG00000184232	OAF	chr11:120081474-120101041	54.8988
ENSG00000165424	ZCCHC24	chr10:81142080-81205383	54.8314
ENSG00000134463	ECHDC3	chr10:11784364-11806069	54.8122
ENSG00000106484	MEST	chr7:130125882-130148500	54.8001
ENSG00000148672	GLUD1	chr10:88810242-88951225	54.7851
ENSG00000107317	PTGDS	chr9:139871955-139880862	54.7414
ENSG00000099998	GGT5	chr22:24615621-24641110	54.7058
ENSG00000091140	DLD	chr7:107531414-107643700	54.6877
ENSG00000124588	NQO2	chr6:2988200-3019996	54.683
ENSG00000269242	CTD-2192J16.22	chr19:12754088-12792716	54.6366
ENSG00000113648	H2AFY	chr5:134363424-134736986	54.5464
ENSG00000176731	C8orf59	chr8:86089459-86132650	54.4371
ENSG00000179604	CDC42EP4	chr17:71279762-71308314	54.4298
ENSG00000113083	LOX	chr5:121297655-121413980	54.4296
ENSG00000158869	FCER1G	chr1:161185023-161193421	54.3676
ENSG00000100813	ACIN1	chr14:23527772-23569665	54.3218
ENSG00000153071	DAB2	chr5:39284363-39462402	54.1276
ENSG00000228499	TMSB10P1	chr2:236402732-237040444	54.1229
ENSG00000223380	SEC22B	chr1:145096219-145116922	54.0879
ENSG00000213585	VDAC1	chr5:133307605-133340824	54.0507
ENSG00000115457	IGFBP2	chr2:217497550-217529159	54.0501
ENSG00000122691	TWIST1	chr7:19060613-19157295	54.0444
ENSG00000114850	SSR3	chr3:156257928-156272973	54.0038
ENSG00000115286	NDUFS7	chr19:1383525-1396466	53.9937
ENSG00000126777	KTN1	chr14:55965995-56168244	53.9869
ENSG00000122679	RAMP3	chr7:45197389-45225901	53.9799
ENSG00000119013	NDUFB3	chr2:201773695-201950473	53.9632
ENSG00000143321	HDGF	chr1:156711898-156770607	53.9361
ENSG00000172660	TAF15	chr17:34136458-34195895	53.9296
ENSG00000008952	SEC62	chr3:169657140-169716161	53.9053
ENSG00000099783	HNRNPM	chr19:8509650-8553998	53.8464
ENSG00000091436	MLTK	chr2:173940162-174146764	53.8271
ENSG00000100804	PSMB5	chr14:23485751-23504439	53.8235
ENSG00000106263	EIF3B	chr7:2291404-2420380	53.7884
ENSG00000257103	LSM14A	chr19:34663408-34720420	53.7688
ENSG00000010256	UQCRC1	chr3:48636434-48648409	53.6407
ENSG00000119673	ACOT2	chr14:74034323-74042357	53.6333
ENSG00000078668	VDAC3	chr8:42249141-42263415	53.5904
ENSG00000116898	MRPS15	chr1:36921318-36930038	53.566
ENSG00000103064	SLC7A6	chr16:68298432-68344849	53.5589
ENSG00000115307	AUP1	chr2:74753771-74784681	53.4465
ENSG00000084090	STARD7	chr2:96850596-96908359	53.4295
ENSG00000112308	C6orf62	chr6:24667262-24721064	53.4188
ENSG00000139318	DUSP6	chr12:89741008-89747048	53.4109
ENSG00000182118	FAM89A	chr1:231154703-231175992	53.4035
ENSG00000178127	NDUFV2	chr18:9102627-9285983	53.3369
ENSG00000100412	ACO2	chr22:41865128-41940610	53.3358
ENSG00000173209	AHSA2	chr2:61404552-61697904	53.2784
ENSG00000180581	SRP9P1	chr10:93558068-93625033	53.2784
ENSG00000213866	YBX1P10	chr9:35971340-35972315	53.2115
ENSG00000127947	PTPN12	chr7:77166591-77269388	53.2042
ENSG00000049860	HEXB	chr5:73923233-74072737	53.2017
ENSG00000100106	TRIOBP	chr22:38077679-38172563	53.1969
ENSG00000079805	DNM2	chr19:10828754-10946994	53.145
ENSG00000150540	HNMT	chr2:138721589-138773930	53.1341
ENSG00000197253	TPSB2	chr16:1277271-1280214	53.1133
ENSG00000149809	TM7SF2	chr11:64851694-64883856	53.0935
ENSG00000163050	ADCK3	chr1:227085236-227175246	53.0701
ENSG00000105854	PON2	chr7:95034174-95064510	53.0567
ENSG00000073584	SMARCE1	chr17:38781213-38821433	52.9731
ENSG00000120963	ZNF706	chr8:102190105-102218421	52.9608
ENSG00000115484	CCT4	chr2:62095223-62374382	52.9588
ENSG00000064042	LIMCH1	chr4:41361623-41702061	52.9169
ENSG00000137106	GRHPR	chr9:37422662-37436987	52.8983
ENSG00000103495	MAZ	chr16:29817426-29859355	52.7806
ENSG00000125503	PPP1R12C	chr19:55602280-55628927	52.6912
ENSG00000076928	ARHGEF1	chr19:42387227-42434302	52.6844
ENSG00000063244	U2AF2	chr19:56165511-56186081	52.6678
ENSG00000213614	HEXA	chr15:72533521-72671129	52.64
ENSG00000204822	MRPL53	chr2:74699084-74722013	52.5721
ENSG00000173436	MINOS1	chr1:19923472-19984945	52.5141
ENSG00000163932	PRKCD	chr3:53190024-53226733	52.4251
ENSG00000197702	PARVA	chr11:12398731-12552348	52.411
ENSG00000170035	UBE2E3	chr2:181831974-182264286	52.4033
ENSG00000184787	UBE2G2	chr21:46188954-46221934	52.3383
ENSG00000134440	NARS	chr18:55267887-55289445	52.2888
ENSG00000031698	SARS	chr1:109756539-109780791	52.241
ENSG00000160213	CSTB	chr21:45192392-45196326	52.1677
ENSG00000104332	SFRP1	chr8:41119480-41167016	52.1426
ENSG00000134453	RBM17	chr10:6130949-6159420	52.1237
ENSG00000171055	FEZ2	chr2:36583068-36873230	52.1108
ENSG00000080503	SMARCA2	chr9:2015341-2193624	52.0957
ENSG00000177119	ANO6	chr12:45566846-45834187	52.0901
ENSG00000143621	ILF2	chr1:153634511-153643524	52.0871
ENSG00000148730	EIF4EBP2	chr10:72164134-72188374	52.0867
ENSG00000004455	AK2	chr1:33452552-33546597	52.0363
ENSG00000119138	KLF9	chr9:72999502-73029540	52.0044
ENSG00000092964	DPYSL2	chr8:26371790-26515694	51.9966
ENSG00000164032	H2AFZ	chr4:100869242-101136662	51.9955
ENSG00000172236	TPSAB1	chr16:1290696-1292555	51.9303
ENSG00000138031	ADCY3	chr2:25012602-25142708	51.9161
ENSG00000146731	CCT6A	chr7:56119322-56131682	51.8814
ENSG00000160201	U2AF1	chr21:44513065-44527697	51.8781
ENSG00000114698	PLSCR4	chr3:145910125-145968966	51.848
ENSG00000117682	DHDDS	chr1:26758772-26797785	51.8412
ENSG00000105202	FBL	chr19:40325097-40337054	51.8142
ENSG00000079459	FDFT1	chr8:11653081-11696818	51.8009
ENSG00000175130	MARCKSL1	chr1:32799432-32801980	51.7464
ENSG00000180304	OAZ2	chr15:64979771-65011801	51.742
ENSG00000181029	TRAPPC5	chr19:7741513-7747744	51.7298
ENSG00000115875	SRSF7	chr2:38970740-38978636	51.7122
ENSG00000167613	LAIR1	chr19:54865361-54882165	51.6723
ENSG00000176974	SHMT1	chr17:18231186-18266856	51.6309
ENSG00000166340	TPP1	chr11:6633999-6640995	51.6051
ENSG00000089327	FXYD5	chr19:35645632-35660786	51.5348
ENSG00000131016	AKAP12	chr6:151561133-151679692	51.5128
ENSG00000196139	AKR1C3	chr10:5077545-5149878	51.4945
ENSG00000198231	DDX42	chr17:61780191-61896677	51.4915
ENSG00000164125	FAM198B	chr4:159045625-159176563	51.4712
ENSG00000172974	AC007318.5	chr2:65432136-65433396	51.4458
ENSG00000188895	MSL1	chr17:38278550-38293042	51.4123
ENSG00000129055	ANAPC13	chr3:134196547-134293859	51.3832
ENSG00000175768	TOMM5	chr9:37510888-38069210	51.3458
ENSG00000073578	SDHA	chr5:218355-256815	51.3325
ENSG00000169926	KLF13	chr15:31619057-31727868	51.2775
ENSG00000087884	AAMDC	chr11:77532154-77705724	51.2626
ENSG00000086061	DNAJA1	chr9:33025208-33039905	51.2576
ENSG00000232320	AC009299.5	chr2:162164548-162268228	51.2421
ENSG00000163072	NOSTRIN	chr2:169312371-169769881	51.2251
ENSG00000105397	TYK2	chr19:10461208-10491352	51.2226
ENSG00000180867	PDIA3P1	chr1:146644349-146767443	51.2087
ENSG00000005955	GGNBP2	chr17:34900736-34946278	51.1671
ENSG00000179144	GIMAP7	chr7:150211917-150218161	51.1624
ENSG00000145495	MARCH6	chr5:10353814-10440500	51.1203
ENSG00000185633	NDUFA4L2	chr12:57623109-57634498	51.1153
ENSG00000113384	GOLPH3	chr5:32124809-32174456	51.1064
ENSG00000126756	UXT	chrX:47511196-47519776	51.0985
ENSG00000197006	METTL9	chr16:21608538-21668794	51.0704
ENSG00000084733	RAB10	chr2:26256975-26360323	51.056
ENSG00000100138	NHP2L1	chr22:42069933-42094140	51.0304
ENSG00000187446	CHP1	chr15:41523036-41574043	50.9798
ENSG00000227850	SEPT2P1	chr1:106240660-106240840	50.9672
ENSG00000124767	GLO1	chr6:38643700-38670917	50.955
ENSG00000075142	SRI	chr7:87834432-87936206	50.9182
ENSG00000152102	FAM168B	chr2:131805448-131851033	50.8976
ENSG00000140350	ANP32A	chr15:69070873-69355083	50.8867
ENSG00000005893	LAMP2	chrX:119561681-119603220	50.8837
ENSG00000077254	USP33	chr1:78161671-78225537	50.8642
ENSG00000101361	NOP56	chr20:2632790-2639039	50.8158
ENSG00000128699	ORMDL1	chr2:190635048-190649097	50.8107
ENSG00000156261	CCT8	chr21:30428125-30446118	50.7924
ENSG00000182934	SRPR	chr11:126071992-126148026	50.7812
ENSG00000179094	PER1	chr17:8043789-8066864	50.7752
ENSG00000002549	LAP3	chr4:17578814-17616194	50.7471
ENSG00000132963	POMP	chr13:29233240-29253062	50.7411
ENSG00000148700	ADD3	chr10:111756125-111895323	50.739
ENSG00000156642	NPTN	chr15:73735498-73926475	50.7381
ENSG00000101460	MAP1LC3A	chr20:33134657-33148149	50.7265
ENSG00000143252	SDHC	chr1:161284046-161332984	50.7158
ENSG00000116962	NID1	chr1:236139129-236228462	50.6888
ENSG00000150687	PRSS23	chr11:86502100-86666433	50.6865
ENSG00000177706	FAM20C	chr7:182934-300711	50.6838
ENSG00000184347	SLIT3	chr5:168081517-168728133	50.6831
ENSG00000141552	ANAPC11	chr17:79845712-79869340	50.6726
ENSG00000082898	XPO1	chr2:61698322-61765761	50.6596
ENSG00000079739	PGM1	chr1:63906440-64125916	50.6516
ENSG00000128609	NDUFA5	chr7:123177050-123198309	50.6372
ENSG00000170581	STAT2	chr12:56735380-56753939	50.5629
ENSG00000166250	CLMP	chr11:122943034-123098985	50.5609
ENSG00000235750	KIAA0040	chr1:175126122-175162135	50.337
ENSG00000106588	PSMA2	chr7:42948324-42988557	50.3157
ENSG00000184983	NDUFA6	chr22:42481528-42535938	50.3123
ENSG00000078304	PPP2R5C	chr14:102228134-102394326	50.2944
ENSG00000105254	TBCB	chr19:36602103-36616849	50.1745
ENSG00000162692	VCAM1	chr1:101185297-101204601	50.1741
ENSG00000185551	NR2F2	chr15:96670597-96883492	50.1648
ENSG00000167986	DDB1	chr11:61066922-61136981	50.1634
ENSG00000122971	ACADS	chr12:121163537-121177811	50.161
ENSG00000103275	UBE2I	chr16:1355547-1377019	50.0925
ENSG00000175274	TP53I11	chr11:44740941-44972840	50.0222
ENSG00000123933	MXD4	chr4:2249158-2264021	49.9903
ENSG00000171159	C9orf16	chr9:130922538-130926207	49.9813
ENSG00000103024	NME3	chr16:1756183-1821731	49.9455
ENSG00000211450	C11orf31	chr11:57480071-57587018	49.9301
ENSG00000189077	TMEM120A	chr7:75528517-75623977	49.925
ENSG00000140983	RHOT2	chr16:718085-724174	49.9081
ENSG00000139567	ACVRL1	chr12:52300691-52317145	49.902
ENSG00000055211	GINM1	chr6:149887429-149912884	49.7955
ENSG00000121064	SCPEP1	chr17:55055465-55084129	49.7284
ENSG00000127948	POR	chr7:75528517-75623977	49.7041
ENSG00000154582	TCEB1	chr8:74851403-74884522	49.6414
ENSG00000165775	FUNDC2	chrX:154064062-154288578	49.6105
ENSG00000140299	BNIP2	chr15:59887073-59981733	49.5553
ENSG00000220842	RP11-572P18.1	chr10:122114176-122114718	49.5237
ENSG00000241878	PISD	chr22:31795508-32058418	49.4905
ENSG00000105281	SLC1A5	chr19:47222763-47291851	49.4012
ENSG00000167930	ITFG3	chr16:284544-333003	49.3747
ENSG00000022277	RTFDC1	chr20:55043646-55101198	49.3635
ENSG00000080822	CLDND1	chr3:98216447-98312567	49.345
ENSG00000137207	YIPF3	chr6:43474706-43543812	49.2864
ENSG00000198792	TMEM184B	chr22:38615297-38669040	49.2761
ENSG00000166228	PCBD1	chr10:72642036-72648541	49.2609
ENSG00000135334	AKIRIN2	chr6:88384789-88411927	49.2452
ENSG00000168090	COPS6	chr7:99686576-99689823	49.2322
ENSG00000175220	ARHGAP1	chr11:46698629-46722165	49.2215
ENSG00000152952	PLOD2	chr3:145781828-145881440	49.1931
ENSG00000152558	TMEM123	chr11:102267062-102369532	49.192
ENSG00000099204	ABLIM1	chr10:116190871-116444762	49.1598
ENSG00000258289	CHURC1	chr14:65381078-65569413	49.1071
ENSG00000205937	RNPS1	chr16:2303116-2323419	49.0921
ENSG00000175550	DRAP1	chr11:65686727-65689032	49.0824
ENSG00000117448	AKR1A1	chr1:46016214-46035721	49.0805
ENSG00000198848	CES1	chr16:55836762-55867249	49.0717
ENSG00000137713	PPP2R1B	chr11:111473114-111637151	49.0482
ENSG00000177576	C18orf32	chr18:47008027-47018906	49.0178
ENSG00000154856	APCDD1	chr18:10454624-10489945	49.0158
ENSG00000168079	SCARA5	chr8:27727398-27850244	49.0152
ENSG00000137033	IL33	chr9:6215804-6257983	48.9689
ENSG00000175203	DCTN2	chr12:57914492-57941114	48.9622
ENSG00000079337	RAPGEF3	chr12:48099867-48231681	48.9156
ENSG00000130312	MRPL34	chr19:17402939-17445638	48.9125
ENSG00000102054	RBBP7	chrX:16804549-16888537	48.9076
ENSG00000088448	ANKRD10	chr13:111530886-111567416	48.8842
ENSG00000104324	CPQ	chr8:97657454-98161882	48.8682
ENSG00000116774	OLFML3	chr1:114522062-114524876	48.8513
ENSG00000130313	PGLS	chr19:17579577-17632097	48.8489
ENSG00000010810	FYN	chr6:111981534-112194655	48.827
ENSG00000125835	SNRPB	chr20:2442279-2505348	48.8142
ENSG00000105058	FAM32A	chr19:16296190-16302857	48.7921
ENSG00000114120	SLC25A36	chr3:140660671-140698775	48.7459
ENSG00000169718	DUS1L	chr17:80015381-80023763	48.7414
ENSG00000112697	TMEM30A	chr6:75962639-75994684	48.7158
ENSG00000119689	DLST	chr14:75348593-75370448	48.6766
ENSG00000114784	EIF1B	chr3:40351174-40353915	48.6503
ENSG00000055950	MRPL43	chr10:102729214-102754158	48.5917
ENSG00000177556	ATOX1	chr5:151121876-151192346	48.5456
ENSG00000163565	IFI16	chr1:158969757-159024945	48.5332
ENSG00000197324	LRP10	chr14:23340821-23350789	48.5043
ENSG00000106554	CHCHD3	chr7:132469628-132766848	48.4847
ENSG00000107581	EIF3A	chr10:120794355-120840316	48.4784
ENSG00000150594	ADRA2A	chr10:112836789-112840658	48.4363
ENSG00000130985	UBA1	chrX:47050259-47074527	48.4347
ENSG00000107816	LZTS2	chr10:102756374-102790890	48.3918
ENSG00000214046	SMIM7	chr19:16589867-16771253	48.3461
ENSG00000158864	NDUFS2	chr1:161154097-161184185	48.2453
ENSG00000204103	MAFB	chr20:39314487-39317880	48.2388
ENSG00000134030	CTIF	chr18:46065416-46389588	48.2068
ENSG00000157873	TNFRSF14	chr1:2481358-2496821	48.2009
ENSG00000138449	SLC40A1	chr2:190425304-190448484	48.1987
ENSG00000069702	TGFBR3	chr1:92145901-92371892	48.192
ENSG00000137878	GCOM1	chr15:57884105-58074960	48.1801
ENSG00000174437	ATP2A2	chr12:110718560-110788898	48.1797
ENSG00000164638	SLC29A4	chr7:5313999-5465045	48.1743
ENSG00000139631	CSAD	chr12:53551446-53584596	48.1736
ENSG00000163660	CCNL1	chr3:156864296-156878549	48.162
ENSG00000140464	PML	chr15:74287013-74340153	48.1495
ENSG00000163297	ANTXR2	chr4:80822302-81046608	48.1079
ENSG00000225663	FAM195B	chr17:79780286-79791178	48.0655
ENSG00000196704	AMZ2	chr17:66242769-66253297	48.0509
ENSG00000116030	SUMO1	chr2:203070902-203103331	48.0404
ENSG00000196547	MAN2A2	chr15:91445447-91465814	48.0127
ENSG00000071626	DAZAP1	chr19:1407567-1435719	48.0076
ENSG00000197982	C1orf122	chr1:38268615-38275126	47.9937
ENSG00000113719	ERGIC1	chr5:172261277-172379688	47.964
ENSG00000169223	LMAN2	chr5:176758562-176778853	47.9453
ENSG00000124831	LRRFIP1	chr2:238536218-238751451	47.9325
ENSG00000198816	ZNF358	chr19:7541760-7585912	47.9261
ENSG00000067064	IDI1	chr10:1034337-1095110	47.8961
ENSG00000125037	EMC3	chr3:10000400-10052893	47.8911
ENSG00000108465	CDK5RAP3	chr17:46018871-46073562	47.8835
ENSG00000174080	CTSF	chr11:66330933-66336312	47.8755
ENSG00000170759	KIF5B	chr10:32297937-32345359	47.8199
ENSG00000065534	MYLK	chr3:123304388-123603178	47.8029
ENSG00000117118	SDHB	chr1:17345216-17380665	47.7677
ENSG00000085231	TAF9	chr5:68646810-68710628	47.7292
ENSG00000141905	NFIC	chr19:3359560-3469215	47.7097
ENSG00000147604	RPL7	chr8:74202505-74268696	47.7036
ENSG00000141349	G6PC3	chr17:42148102-42153709	47.6948
ENSG00000151491	EPS8	chr12:15773091-16035263	47.6725
ENSG00000018625	ATP1A2	chr1:160085548-160113381	47.6544
ENSG00000239951	IGKV3-20	chr2:89442056-89442643	47.6296
ENSG00000147883	CDKN2B	chr9:21802541-22121096	47.6037
ENSG00000104331	IMPAD1	chr8:57870491-57906403	47.574
ENSG00000269858	EGLN2	chr19:41277552-41406413	47.5293
ENSG00000167085	PHB	chr17:47448101-47554350	47.4907
ENSG00000139679	LPAR6	chr13:48877886-49056122	47.4809
ENSG00000126698	DNAJC8	chr1:28525966-28559536	47.3848
ENSG00000129351	ILF3	chr19:10764936-10803093	47.3737
ENSG00000144895	EIF2A	chr3:150259780-150348222	47.3554
ENSG00000184602	SNN	chr16:11762269-11838362	47.3233
ENSG00000108622	ICAM2	chr17:62073430-62097994	47.3189
ENSG00000132274	TRIM22	chr11:5684424-5959849	47.2907
ENSG00000173757	STAT5B	chr17:40351185-40428725	47.2681
ENSG00000140941	MAP1LC3B	chr16:87117167-87438385	47.2671
ENSG00000127837	AAMP	chr2:219128849-219134980	47.2213
ENSG00000165175	MID1IP1	chrX:38660684-38665790	47.208
ENSG00000069849	ATP1B3	chr3:141594965-141645356	47.1794
ENSG00000204843	DCTN1	chr2:74425688-74621009	47.1639
ENSG00000197694	SPTAN1	chr9:131314865-131419066	47.1578
ENSG00000115234	SNX17	chr2:27593388-27599995	47.1251
ENSG00000127951	FGL2	chr7:76139744-77045717	47.0773
ENSG00000215492	HNRNPA1P7	chr18:29598334-30050447	47.0513
ENSG00000100288	CHKB	chr22:51007289-51052409	47.0435
ENSG00000013583	HEBP1	chr12:13080659-13193613	47.0315
ENSG00000198961	PJA2	chr5:108670409-108745695	47.0201
ENSG00000213058	RP4-765C7.2	chr1:178060642-178448644	47.0138
ENSG00000028528	SNX1	chr15:64386321-64438289	47.0008
ENSG00000188783	PRELP	chr1:203444955-203460480	46.9618
ENSG00000196405	EVL	chr14:100437785-100610573	46.9295
ENSG00000124172	ATP5E	chr20:57594308-57607437	46.9118
ENSG00000152818	UTRN	chr6:144606836-145174170	46.9044
ENSG00000071282	LMCD1	chr3:7994491-8653610	46.898
ENSG00000239779	WBP1	chr2:74682149-74688018	46.8942
ENSG00000112576	CCND3	chr6:41902670-42018095	46.8718
ENSG00000103187	COTL1	chr16:84599199-84651683	46.8281
ENSG00000115541	HSPE1	chr2:198351304-198418423	46.8186
ENSG00000134686	PHC2	chr1:33772366-33896653	46.8102
ENSG00000196923	PDLIM7	chr5:176910394-176938275	46.8023
ENSG00000177885	GRB2	chr17:73314156-73401790	46.761
ENSG00000117691	NENF	chr1:212606228-212619714	46.7498
ENSG00000153130	SCOC	chr4:141178439-141306880	46.7154
ENSG00000162736	NCSTN	chr1:160259062-160328742	46.6902
ENSG00000049656	CLPTM1L	chr5:1317858-1345214	46.6669
ENSG00000082438	COBLL1	chr2:165510133-165705844	46.6519
ENSG00000245812	RP11-175K6.1	chr5:158527490-158544486	46.6339
ENSG00000164035	EMCN	chr4:101316497-101801283	46.6329
ENSG00000128284	APOL3	chr22:36536371-36562225	46.6252
ENSG00000124181	PLCG1	chr20:39657457-39946312	46.6229
ENSG00000129116	PALLD	chr4:169277885-169931426	46.5961
ENSG00000143569	UBAP2L	chr1:154179181-154243986	46.5581
ENSG00000104853	CLPTM1	chr19:45457841-45496599	46.5514
ENSG00000216490	IFI30	chr19:18263927-18288927	46.4916
ENSG00000255717	SNHG1	chr11:62619459-62623386	46.4822
ENSG00000131149	GSE1	chr16:85645014-85723679	46.455
ENSG00000154945	ANKRD40	chr17:48770550-48785285	46.4443
ENSG00000114019	AMOTL2	chr3:134070693-134094321	46.4335
ENSG00000214548	MEG3	chr14:101245746-101327368	46.4287
ENSG00000126457	PRMT1	chr19:50179042-50193832	46.428
ENSG00000102119	EMD	chrX:153607556-153609883	46.4187
ENSG00000146729	GBAS	chr7:55954969-56067874	46.4072
ENSG00000138867	GUCD1	chr22:24936405-25024972	46.405
ENSG00000141504	SAT2	chr17:7465191-7536700	46.3749
ENSG00000127955	GNAI1	chr7:79763270-79848718	46.3692
ENSG00000131634	TMEM204	chr16:1543344-1662111	46.3593
ENSG00000168003	SLC3A2	chr11:62623517-62656352	46.3262
ENSG00000224837	GCSHP5	chr1:167885966-168045081	46.3247
ENSG00000102606	ARHGEF7	chr13:111766158-111958084	46.2836
ENSG00000165801	ARHGEF40	chr14:21484921-21572881	46.2764
ENSG00000130635	COL5A1	chr9:137533619-137736686	46.2623
ENSG00000168264	IRF2BP2	chr1:234740014-234745271	46.2498
ENSG00000011028	MRC2	chr17:60704761-60770958	46.2466
ENSG00000110880	CORO1C	chr12:109038884-109125372	46.2382
ENSG00000163346	PBXIP1	chr1:154916551-154928599	46.2328
ENSG00000088882	CPXM1	chr20:2774714-2781283	46.2212
ENSG00000117410	ATP6V0B	chr1:44440158-44443967	46.1762
ENSG00000164754	RAD21	chr8:117654368-117889107	46.1078
ENSG00000178104	PDE4DIP	chr1:144836156-145076186	46.0984
ENSG00000158195	WASF2	chr1:27730729-27816669	46.0656
ENSG00000099977	DDT	chr22:24309088-24326106	46.0417
ENSG00000143575	HAX1	chr1:154244986-154248351	46.0328
ENSG00000111321	LTBR	chr12:6456008-6500733	45.9441
ENSG00000233954	RP11-169K16.7	chr1:16133678-16134194	45.9309
ENSG00000173221	GLRX	chr5:95036952-95160087	45.897
ENSG00000105426	PTPRS	chr19:5158505-5340814	45.8544
ENSG00000178761	FAM219B	chr15:75192327-75199462	45.8383
ENSG00000117054	ACADM	chr1:76190035-76260764	45.8324
ENSG00000234009	RPL5P34	chr22:43172411-43173302	45.8021
ENSG00000109606	DHX15	chr4:24519063-24586173	45.7582
ENSG00000130158	DOCK6	chr19:11309970-11373157	45.7527
ENSG00000236801	RPL24P8	chr9:72658496-72873782	45.7429
ENSG00000204469	PRRC2A	chr6:31588496-31605548	45.7027
ENSG00000129187	DCTD	chr4:183811212-183839089	45.7012
ENSG00000108561	C1QBP	chr17:5185557-5372380	45.6771
ENSG00000129250	KIF1C	chr17:4901242-4931696	45.6748
ENSG00000145779	TNFAIP8	chr5:118604386-118735383	45.6638
ENSG00000062716	VMP1	chr17:57697218-57919616	45.6506
ENSG00000174233	ADCY6	chr12:49159974-49182820	45.6143
ENSG00000071894	CPSF1	chr8:145596789-145634753	45.5856
ENSG00000224861	YBX1P1	chr14:66479547-66480507	45.5771
ENSG00000105185	PDCD5	chr19:33071973-33078358	45.5657
ENSG00000181019	NQO1	chr16:69740898-69760854	45.432
ENSG00000175416	CLTB	chr5:175792470-175843570	45.4293
ENSG00000179950	PUF60	chr8:144898513-144912029	45.4137
ENSG00000169398	PTK2	chr8:141667998-142012315	45.397
ENSG00000106049	HIBADH	chr7:27565060-27702614	45.3956
ENSG00000160271	RALGDS	chr9:135973106-136039332	45.3828
ENSG00000103168	TAF1C	chr16:84178864-84220669	45.3047
ENSG00000061676	NCKAP1	chr2:183773842-183903586	45.3024
ENSG00000232346	SC22CB-1E7.1	chr22:32435476-32435883	45.2805
ENSG00000114416	FXR1	chr3:180319917-180700541	45.2665
ENSG00000075790	BCAP29	chr7:107220001-107269943	45.258
ENSG00000121579	NAA50	chr3:113435306-113465147	45.2554
ENSG00000053254	FOXN3	chr14:89591214-90421121	45.2527
ENSG00000124702	KLHDC3	chr6:42981950-42989036	45.2278
ENSG00000135917	SLC19A3	chr2:228549925-228582728	45.2231
ENSG00000218227	RP11-889L3.1	chr5:177482604-177483195	45.2141
ENSG00000065154	OAT	chr10:126085871-126107545	45.1189
ENSG00000114354	TFG	chr3:100428204-100467810	45.0936
ENSG00000101084	C20orf24	chr20:34894257-35274619	45.0865
ENSG00000198856	OSTC	chr4:109571739-109588976	45.0415
ENSG00000003056	M6PR	chr12:9066491-9102551	45.0329
ENSG00000162384	C1orf123	chr1:53662100-53686289	45.0296
ENSG00000171680	PLEKHG5	chr1:6484847-6580121	45.0203
ENSG00000116489	CAPZA1	chr1:113009162-113214241	45.0024
ENSG00000135018	UBQLN1	chr9:86274877-86328293	44.9802
ENSG00000157617	C2CD2	chr21:43305220-43373999	44.9296
ENSG00000092148	HECTD1	chr14:31569317-31677010	44.8935
ENSG00000136143	SUCLA2	chr13:48510621-48621358	44.8932
ENSG00000148218	ALAD	chr9:116148596-116163613	44.8723
ENSG00000130508	PXDN	chr2:1635658-1748624	44.8383
ENSG00000161057	PSMC2	chr7:102937868-103629963	44.8178
ENSG00000010404	IDS	chrX:148558520-148632055	44.7736
ENSG00000225259	ST13P6	chr8:134420248-134421471	44.7694
ENSG00000164104	HMGB2	chr4:174252845-174256276	44.7307
ENSG00000136068	FLNB	chr3:57994126-58157982	44.6815
ENSG00000133142	TCEAL4	chrX:102831158-102842657	44.6605
ENSG00000108523	RNF167	chr17:4840424-4848517	44.6545
ENSG00000140497	SCAMP2	chr15:75136070-75165706	44.6497
ENSG00000179195	ZNF664	chr12:124247041-124800570	44.636
ENSG00000221823	PPP3R1	chr2:68350067-68488362	44.6089
ENSG00000158941	CCAR2	chr8:22462144-22526661	44.6057
ENSG00000157020	SEC13	chr3:10289706-10362862	44.5918
ENSG00000213598	RP11-112J1.1	chr14:59261371-59261747	44.5739
ENSG00000158828	PINK1	chr1:20959947-20988000	44.5504
ENSG00000159199	ATP5G1	chr17:46952221-47006418	44.5322
ENSG00000118518	RNF146	chr6:127587754-127609712	44.486
ENSG00000090060	PAPOLA	chr14:96967146-97033448	44.451
ENSG00000147533	GOLGA7	chr8:41347914-41368499	44.4344
ENSG00000095787	WAC	chr10:28811580-28912041	44.4293
ENSG00000006015	C19orf60	chr19:18682539-18731849	44.4288
ENSG00000132676	DAP3	chr1:155579566-155829191	44.4255
ENSG00000166848	TERF2IP	chr16:75661621-75795770	44.4042
ENSG00000089248	ERP29	chr12:112451119-112461255	44.3891
ENSG00000099860	GADD45B	chr19:2476119-2478257	44.344
ENSG00000168004	HRASLS5	chr11:63228875-63258666	44.336
ENSG00000125753	VASP	chr19:46009836-46030241	44.3338
ENSG00000205531	NAP1L4	chr11:2965666-3013607	44.3267
ENSG00000175183	CSRP2	chr12:77252494-77274132	44.3244
ENSG00000168874	ATOH8	chr2:85978466-86015189	44.2966
ENSG00000105669	COPE	chr19:19010322-19057640	44.2817
ENSG00000049449	RCN1	chr11:31806339-32127301	44.2808
ENSG00000126945	HNRNPH2	chrX:100645811-100669121	44.2026
ENSG00000205581	HMGN1	chr21:40714240-40721573	44.1391
ENSG00000205726	ITSN1	chr21:34876237-35349992	44.1183
ENSG00000104979	C19orf53	chr19:13875345-13889276	44.1178
ENSG00000105483	CARD8	chr19:48673948-48790865	44.1056
ENSG00000008710	PKD1	chr16:2089815-2185899	44.0749
ENSG00000160310	PRMT2	chr21:48055078-48085036	44.0646
ENSG00000125818	PSMF1	chr20:1093905-1160596	44.0445
ENSG00000204264	PSMB8	chr6:32808493-32827362	44.0391
ENSG00000166927	MS4A7	chr11:60102303-60185161	44.0382
ENSG00000108424	KPNB1	chr17:45726841-45762871	44.0356
ENSG00000219928	RP11-40C6.2	chr9:90112142-90323548	44.0286
ENSG00000242574	HLA-DMB	chr6:32902405-32949282	44.0257
ENSG00000115091	ACTR3	chr2:114647536-114720173	44.0252
ENSG00000132612	VPS4A	chr16:69139466-69442474	43.9982
ENSG00000120265	PCMT1	chr6:150045450-150132556	43.9901
ENSG00000175606	TMEM70	chr8:74884671-74895018	43.9839
ENSG00000174231	PRPF8	chr17:1553922-1588176	43.9653
ENSG00000196498	NCOR2	chr12:124808960-125052135	43.9547
ENSG00000107537	PHYH	chr10:13319795-13344412	43.9537
ENSG00000171735	CAMTA1	chr1:6845383-7829766	43.8995
ENSG00000170262	MRAP	chr21:33664123-33765335	43.8886
ENSG00000101367	MAPRE1	chr20:31407698-31442063	43.8689
ENSG00000144891	AGTR1	chr3:148415570-148460795	43.8598
ENSG00000173933	RBM4	chr11:66384052-66445392	43.8524
ENSG00000235957	COX7CP1	chr13:49550047-49783915	43.7304
ENSG00000162613	FUBP1	chr1:78409739-78444794	43.7288
ENSG00000100077	ADRBK2	chr22:25960815-26125261	43.7172
ENSG00000173801	JUP	chr17:39775688-39943183	43.715
ENSG00000130309	COLGALT1	chr19:17666402-17693971	43.7028
ENSG00000120705	ETF1	chr5:137841783-137878989	43.6909
ENSG00000078618	NRD1	chr1:52027537-52344477	43.6656
ENSG00000124491	F13A1	chr6:6144317-6321246	43.6465
ENSG00000087116	ADAMTS2	chr5:178537851-178772431	43.6452
[truncated: 55,711 more rows]
