# Supplementary material for: A new synthetic toll-like receptor 1/2 ligand is an efficient adjuvant for peptide vaccination in a human volunteer
Source: J Immunother Cancer. 2019 Nov 15;7:307. doi: 10.1186/s40425-019-0796-5 (PMC6858783; doi:10.1186/s40425-019-0796-5)
Supplement: Supplementary file 4 — Additional file 4. Transcriptome Granuloma Distal Edge (FPKM values). [file 40425_2019_796_MOESM4_ESM.xlsx]

## Sheet:  Granuloma Distal Edge
ID	GENE	LOCUS	FPKM
ENSG00000211592	IGKC	chr2:89109983-89165653	22646.9
ENSG00000166710	B2M	chr15:45003674-45011075	10168.7
ENSG00000211896	IGHG1	chr14:106202679-106209408	9557.34
ENSG00000230043	TMSB4XP6	chr20:49411430-49493714	8194.67
ENSG00000087086	FTL	chr19:49468557-49470135	6884.21
ENSG00000019582	CD74	chr5:149781199-149792492	6338.82
ENSG00000211937	IGHV2-5	chr14:106494134-106494597	4954.48
ENSG00000167996	FTH1	chr11:61717292-61735132	4839.7
ENSG00000239951	IGKV3-20	chr2:89442056-89442643	4531.3
ENSG00000090382	LYZ	chr12:69742120-69748014	3671.42
ENSG00000075624	ACTB	chr7:5566781-5603415	3620.72
ENSG00000113140	SPARC	chr5:151040656-151104343	3445.01
ENSG00000108821	COL1A1	chr17:48260649-48278993	3349.24
ENSG00000204287	HLA-DRA	chr6:32407618-32412823	3147.37
ENSG00000211675	IGLC1	chr22:23229959-23238287	3141.49
ENSG00000164692	COL1A2	chr7:94023872-94060544	3127.63
ENSG00000242472	IGHJ5	chr14:106330023-106330072	3055.78
ENSG00000133112	TPT1	chr13:45911007-45965872	3007.63
ENSG00000034510	TMSB10	chr2:85048773-85134132	2981.57
ENSG00000205542	TMSB4X	chrX:12993226-12995346	2753.19
ENSG00000234745	HLA-B	chr6:31321648-31325414	2723.12
ENSG00000207834	D86994.2	chr22:23006897-23007377	2613.24
ENSG00000168542	COL3A1	chr2:189839045-189877472	2540.58
ENSG00000211899	IGHM	chr14:106320348-106322323	2189.37
ENSG00000211895	IGHA1	chr14:106173456-106175002	1869.99
ENSG00000211666	IGLV2-14	chr22:23101184-23101707	1781.54
ENSG00000026025	VIM	chr10:17256237-17279592	1662.21
ENSG00000213741	RPS29	chr14:50043389-50081390	1630.36
ENSG00000197756	RPL37A	chr2:217250010-217443903	1618.03
ENSG00000211959	IGHV4-39	chr14:106877618-106878126	1598.65
ENSG00000253998	IGKV2-29	chr2:89533654-89534393	1594.42
ENSG00000196126	HLA-DRB1	chr6:32546545-32557625	1590.11
ENSG00000231389	HLA-DPA1	chr6:33032345-33054978	1547.57
ENSG00000142534	RPS11	chr19:49999621-50002946	1517.92
ENSG00000204525	HLA-C	chr6:31236525-31239907	1468.06
ENSG00000167526	RPL13	chr16:89627064-89630950	1437.69
ENSG00000206503	HLA-A	chr6:29909036-29913661	1418.79
ENSG00000101439	CST3	chr20:23608533-23619110	1389.47
ENSG00000105372	RPS19	chr19:42363987-42376994	1373.08
ENSG00000108298	RPL19	chr17:37356535-37360980	1356.17
ENSG00000011465	DCN	chr12:91539024-91576900	1340.96
ENSG00000139329	LUM	chr12:91496405-91505608	1340.06
ENSG00000211893	IGHG2	chr14:106109388-106115394	1318.71
ENSG00000137818	RPLP1	chr15:69745122-69748255	1311.23
ENSG00000211943	IGHV3-15	chr14:106610312-106610852	1298.55
ENSG00000115414	FN1	chr2:216225162-216300895	1289.28
ENSG00000187653	TMSB4XP8	chr4:91048685-92523064	1278.13
ENSG00000179344	HLA-DQB1	chr6:32627243-32636160	1270.63
ENSG00000197746	PSAP	chr10:73576054-73611126	1245.37
ENSG00000211677	IGLC2	chr22:23243155-23243617	1245.02
ENSG00000164733	CTSB	chr8:11700032-11726957	1239.5
ENSG00000174444	RPL4	chr15:66790354-66858317	1233.89
ENSG00000184009	ACTG1	chr17:79476996-79494802	1233.7
ENSG00000071082	RPL31	chr2:101436613-101886778	1221.16
ENSG00000211598	IGKV4-1	chr2:89184912-89185669	1205.55
ENSG00000223865	HLA-DPB1	chr6:33032345-33054978	1195.92
ENSG00000145592	RPL37	chr5:40825363-40835437	1186.63
ENSG00000243466	IGKV1-5	chr2:89246818-89247475	1178.12
ENSG00000142676	RPL11	chr1:24018268-24022915	1176.8
ENSG00000211651	IGLV1-44	chr22:22735134-22735715	1160.11
ENSG00000211679	IGLC3	chr22:23248511-23248973	1133.69
ENSG00000236552	RPL13AP5	chr10:98510044-98510675	1113.85
ENSG00000008988	RPS20	chr8:56979853-56987069	1112
ENSG00000226608	FTLP3	chr20:4004551-4005091	1108.19
ENSG00000227097	RP11-742N3.1	chr11:81590892-82429124	1100.35
ENSG00000231500	RPS18	chr6:33217310-33244287	1100.11
ENSG00000149273	RPS3	chr11:75110529-75133324	1094.56
ENSG00000138326	RPS24	chr10:79793517-79816570	1068.28
ENSG00000108107	RPL28	chr19:55896712-55919145	1067.75
ENSG00000241351	IGKV3-11	chr2:89326667-89327228	1050.45
ENSG00000140988	RPS2	chr16:2012052-2014861	1045.17
ENSG00000156508	EEF1A1	chr6:74225472-74280319	1039.23
ENSG00000177600	RPLP2	chr11:799178-812880	1038.87
ENSG00000156482	RPL30	chr8:98881067-99058697	1033.29
ENSG00000105193	RPS16	chr19:39923846-39926588	1012.36
ENSG00000211941	IGHV3-11	chr14:106573232-106573800	1007.02
ENSG00000243238	IGKV2-30	chr2:89544263-89545079	1004.64
ENSG00000211897	IGHG3	chr14:106235438-106237742	992.161
ENSG00000111640	GAPDH	chr12:6643092-6647537	983.359
ENSG00000186468	RPS23	chr5:81267843-81574396	974.114
ENSG00000144713	RPL32	chr3:12837970-12913415	973.004
ENSG00000087245	MMP2	chr16:55423611-55540603	972.676
ENSG00000213442	RPL18AP3	chr12:104609556-104744061	966.761
ENSG00000063177	RPL18	chr19:49118584-49140695	964.091
ENSG00000211648	IGLV1-47	chr22:22712086-22712608	954.847
ENSG00000232573	RPL3P4	chr14:99439215-99439638	953.007
ENSG00000235174	RPL39P3	chr6:74078277-74161999	923.837
ENSG00000131469	RPL27	chr17:41150289-41154976	908.748
ENSG00000161016	RPL8	chr8:146015149-146017972	904.037
ENSG00000137154	RPS6	chr9:19375448-19380252	903.868
ENSG00000125691	RPL23	chr17:37004117-37010096	902.126
ENSG00000136942	RPL35	chr9:127615754-127624260	894.405
ENSG00000100316	RPL3	chr22:39708886-39716394	894.076
ENSG00000161970	RPL26	chr17:8268880-8286531	886.959
ENSG00000211650	IGLV5-45	chr22:22730354-22730874	884.956
ENSG00000142937	RPS8	chr1:45205489-45244451	879.605
ENSG00000102265	TIMP1	chrX:47420515-47479252	873.377
ENSG00000135404	CD63	chr12:56119106-56124467	869.271
ENSG00000161634	DCD	chr12:55038374-55042277	864.03
ENSG00000170889	RPS9	chr19:54704609-54752862	862.157
ENSG00000142156	COL6A1	chr21:47401650-47424964	861.434
ENSG00000244398	RP11-466H18.1	chr11:16799841-17074583	845.636
ENSG00000231486	AC096579.7	chr2:89109983-89165653	840.152
ENSG00000211965	IGHV3-49	chr14:107012937-107013477	832.619
ENSG00000134419	RPS15A	chr16:18792616-18813000	829.729
ENSG00000204628	GNB2L1	chr5:180663908-180699308	811.413
ENSG00000100097	LGALS1	chr22:38071614-38075813	807.429
ENSG00000108518	PFN1	chr17:4848946-4860426	805.664
ENSG00000147403	RPL10	chrX:153618314-153650065	798.293
ENSG00000211892	IGHG4	chr14:106090686-106092403	796.223
ENSG00000109475	RPL34	chr4:109541721-109551568	785.998
ENSG00000240671	IGKV1-8	chr2:89291927-89292450	785.36
ENSG00000197956	S100A6	chr1:153506078-153508720	781.433
ENSG00000092841	MYL6	chr12:56544579-56584068	780.148
ENSG00000218426	RP11-475C16.1	chr6:153552454-153668623	773.007
ENSG00000164587	RPS14	chr5:149822752-149829319	762.28
ENSG00000204592	HLA-E	chr6:30457243-30461982	752.922
ENSG00000221983	UBA52	chr19:18682539-18731849	746.247
ENSG00000196205	EEF1A1P5	chr9:135894815-135896553	745.553
ENSG00000163191	S100A11	chr1:151967006-152020383	744.432
ENSG00000112306	RPS12	chr6:133135579-133138703	738.404
ENSG00000166441	RPL27A	chr11:8703957-8932498	717.921
ENSG00000182899	RPL35A	chr3:197615945-197687013	712.574
ENSG00000196735	HLA-DQA1	chr6:32595955-32614839	709.719
ENSG00000211662	IGLV3-21	chr22:23054173-23055688	709.022
ENSG00000237973	hsa-mir-6723	chr1:536815-660283	703.099
ENSG00000234851	RP11-3P17.3	chr3:161144214-161166030	701.892
ENSG00000117289	TXNIP	chr1:145438468-145442635	694.902
ENSG00000130066	SAT1	chrX:23801289-23804343	681.085
ENSG00000104904	OAZ1	chr19:2252250-2273487	673.763
ENSG00000172757	CFL1	chr11:65590492-65641063	655.106
ENSG00000125730	C3	chr19:6677714-6737614	647.245
ENSG00000216490	IFI30	chr19:18263927-18288927	639.653
ENSG00000211668	IGLV2-11	chr22:23134976-23135496	636.399
ENSG00000089157	RPLP0	chr12:120634488-120639038	634.104
ENSG00000234287	RP11-761N21.2	chr3:40803035-40803290	628.179
ENSG00000110700	RPS13	chr11:17095935-17229530	627.63
ENSG00000173369	C1QB	chr1:22979254-22988031	618.724
ENSG00000159403	C1R	chr12:7187512-7275097	618.049
ENSG00000140264	SERF2	chr15:44019115-44095241	607.743
ENSG00000130203	APOE	chr19:45409010-45412650	604.744
ENSG00000173372	C1QA	chr1:22962998-22966101	603.259
ENSG00000129538	RNASE1	chr14:21269386-21271437	601.334
ENSG00000211904	IGHJ2	chr14:106331408-106331460	597.788
ENSG00000172809	RPL38	chr17:72199720-72209481	595.394
ENSG00000167658	EEF2	chr19:3976053-3985467	594.251
ENSG00000117984	CTSD	chr11:1753639-1785255	590.45
ENSG00000149925	ALDOA	chr16:30064410-30081778	590.018
ENSG00000187514	PTMA	chr2:232571516-232578251	585.223
ENSG00000198755	RPL10A	chr6:35436184-35438562	583.51
ENSG00000244313	RP11-425L10.1	chr11:46417963-46615675	575.58
ENSG00000142089	IFITM3	chr11:318639-330122	570.746
ENSG00000130255	RPL36	chr19:5674957-5720583	560.711
ENSG00000142541	RPL13A	chr19:49949554-49995565	558.145
ENSG00000215030	RPL13P12	chr17:17286690-17287326	552.299
ENSG00000211938	IGHV3-7	chr14:106518399-106518932	551.261
ENSG00000122406	RPL5	chr1:93297581-93307481	551.2
ENSG00000170296	GABARAP	chr17:7143332-7167302	547.662
ENSG00000011600	TYROBP	chr19:36395302-36399197	544.994
ENSG00000162511	LAPTM5	chr1:31205315-31230667	538.583
ENSG00000211949	IGHV3-23	chr14:106725200-106725733	530.075
ENSG00000234975	FTH1P2	chr1:228823161-228823574	525.097
ENSG00000244116	IGKV2-28	chr2:89521178-89521942	509.272
ENSG00000251705	RNA5-8SP6	chrY:10037763-10037915	508.997
ENSG00000224631	RP11-51O6.1	chr16:61089302-61089868	507.143
ENSG00000196154	S100A4	chr1:153516088-153522612	505.411
ENSG00000051523	CYBA	chr16:88709690-88717560	500.467
ENSG00000230629	RPS23P8	chrX:70182813-70183143	499.082
ENSG00000173812	EIF1	chr17:39775688-39943183	492.574
ENSG00000172551	MUCL1	chr12:55224302-55252177	492.413
ENSG00000198034	RPS4X	chrX:71401202-71527037	491.857
ENSG00000070756	PABPC1	chr8:101698043-101735037	490.901
ENSG00000115268	RPS15	chr19:1438357-1440583	490.637
ENSG00000132386	SERPINF1	chr17:1665252-1680868	487.129
ENSG00000227081	RP11-543P15.1	chr12:3186520-3395730	483.475
ENSG00000241781	AL161626.1	chr9:79186730-79186787	481.193
ENSG00000132465	IGJ	chr4:71494460-71552533	471.105
ENSG00000110651	CD81	chr11:2349978-2418649	469.658
ENSG00000148303	RPL7A	chr9:136215068-136218281	464.966
ENSG00000136156	ITM2B	chr13:48807293-48837063	464.761
ENSG00000171858	RPS21	chr20:60962171-60963576	462.074
ENSG00000211966	IGHV5-51	chr14:107034728-107035221	455.305
ENSG00000162244	RPL29	chr3:52027615-52029958	450.934
ENSG00000083845	RPS5	chr19:58897766-58906173	448.125
ENSG00000196531	NACA	chr12:57106211-57181574	445.53
ENSG00000101160	CTSZ	chr20:57570239-57582302	441.717
ENSG00000211660	IGLV2-23	chr22:23040273-23040892	441.07
ENSG00000197958	RPL12	chr9:130209952-130213684	441.023
ENSG00000159189	C1QC	chr1:22970122-22974603	437.02
ENSG00000234797	RPS3AP6	chr15:60060542-60061347	435.669
ENSG00000149806	FAU	chr11:64888099-64902004	422.216
ENSG00000114391	RPL24	chr3:101399934-101405626	420.755
ENSG00000211669	IGLV3-10	chr22:23154243-23154782	419.686
ENSG00000182326	C1S	chr12:7072407-7178336	418.31
ENSG00000174748	RPL15	chr3:23933150-24022109	417.377
ENSG00000240342	RPS2P5	chr12:118587605-118810750	413.147
ENSG00000211671	IGLV2-8	chr22:23165152-23165787	412.663
ENSG00000211974	IGHV2-70	chr14:107178819-107179338	412.13
ENSG00000158869	FCER1G	chr1:161185023-161193421	412.008
ENSG00000118181	RPS25	chr11:118868851-118901616	407.647
ENSG00000211659	IGLV3-25	chr22:23029189-23029735	405.849
ENSG00000133110	POSTN	chr13:38136719-38172981	401.315
ENSG00000197747	S100A10	chr1:151955390-151966866	401.054
ENSG00000130600	H19	chr11:2016405-2022700	400.991
ENSG00000123349	PFDN5	chr12:53689074-53700961	400.518
ENSG00000131143	COX4I1	chr16:85805363-85840650	400.514
ENSG00000111341	MGP	chr12:14956505-15059520	400.389
ENSG00000211663	IGLV3-19	chr22:23063107-23063630	395.656
ENSG00000244437	IGKV3-15	chr2:89384672-89385283	392.593
ENSG00000250722	SEPP1	chr5:42756902-42887494	391.892
ENSG00000107562	CXCL12	chr10:44793037-44881941	391.555
ENSG00000197766	CFD	chr19:859452-863453	390.696
ENSG00000163453	IGFBP7	chr4:57829535-58071676	390.673
ENSG00000112096	SOD2	chr6:160090088-160210781	389.234
ENSG00000213553	RPLP0P6	chr2:38633860-38742882	388.507
ENSG00000025708	TYMP	chr22:50961996-50971009	384.947
ENSG00000141753	IGFBP4	chr17:38599701-38613983	383.084
ENSG00000087460	GNAS	chr20:57393973-57486247	381.282
ENSG00000211973	IGHV1-69	chr14:107169930-107170428	379.2
ENSG00000030582	GRN	chr17:42422613-42430470	376.19
ENSG00000143947	RPS27A	chr2:55401926-55462989	376.075
ENSG00000149131	SERPING1	chr11:57364859-57382326	373.937
ENSG00000067560	RHOA	chr3:49396577-49453908	366.92
ENSG00000211940	IGHV3-9	chr14:106552284-106552809	365.301
ENSG00000130429	ARPC1B	chr7:98923520-99063954	365.125
ENSG00000166794	PPIB	chr15:64443913-64455404	362.645
ENSG00000132475	H3F3B	chr17:73772514-73821886	361.625
ENSG00000198618	PPIAP22	chr21:20230096-20230594	360.516
ENSG00000185201	IFITM2	chr11:307630-315272	359.429
ENSG00000188846	RPL14	chr3:40498782-40503861	359.028
ENSG00000236439	RP11-175B9.3	chr1:202317826-202679545	357.714
ENSG00000245532	NEAT1	chr11:65190244-65213011	356.997
ENSG00000145423	SFRP2	chr4:154701743-154710272	356.858
ENSG00000233276	GPX1	chr3:49394608-49396033	354.489
ENSG00000163131	CTSS	chr1:150702671-150738433	353.525
ENSG00000185215	TNFAIP2	chr14:103589778-103603776	352.215
ENSG00000148180	GSN	chr9:123940414-124095121	351.26
ENSG00000196924	FLNA	chrX:153576891-153603006	350.771
ENSG00000169442	CD52	chr1:26605666-26647014	350.168
ENSG00000143387	CTSK	chr1:150768683-150780799	350.098
ENSG00000185641	CTD-2287O16.1	chr5:115298150-115395815	349.885
ENSG00000242299	RP11-234A1.1	chr3:101292938-101313281	349.516
ENSG00000213145	CRIP1	chr14:105952653-105965912	349.138
ENSG00000145824	CXCL14	chr5:134895266-134970564	348.57
ENSG00000223361	FTH1P10	chr5:17353803-17355008	348.353
ENSG00000211653	IGLV1-40	chr22:22764097-22764614	346.064
ENSG00000182492	BGN	chrX:152710177-152775012	343.266
ENSG00000227615	RP11-864N7.2	chr11:74456760-74457159	342.074
ENSG00000104529	EEF1D	chr8:144661805-144682485	342.009
ENSG00000242371	IGKV1-39	chr2:89619382-89619904	340.614
ENSG00000137970	RPL7P9	chr1:97144429-97145176	339.203
ENSG00000219507	FTH1P8	chrX:147133752-147134266	337.086
ENSG00000182718	ANXA2	chr15:60639332-60695082	334.818
ENSG00000178464	CTD-2192J16.15	chr19:12754088-12792716	331.357
ENSG00000138755	CXCL9	chr4:76831808-76928641	331.023
ENSG00000122862	SRGN	chr10:70847861-70864567	330.141
ENSG00000119655	NPC2	chr14:74942894-74963809	328.346
ENSG00000225523	IGKV6D-21	chr2:90060376-90060995	327.01
ENSG00000170315	UBB	chr17:16284111-16286059	326.92
ENSG00000183405	RPS7P1	chr17:26782769-26972472	326.406
ENSG00000254709	IGLL5	chr22:23229959-23238287	324.324
ENSG00000158710	TAGLN2	chr1:159887896-159895522	323.129
ENSG00000142669	SH3BGRL3	chr1:26605666-26647014	323.08
ENSG00000111348	ARHGDIB	chr12:15094950-15114662	322.853
ENSG00000108654	DDX5	chr17:62495733-62658186	318.748
ENSG00000204257	HLA-DMA	chr6:32902405-32949282	318.456
ENSG00000035862	TIMP2	chr17:76849058-76921469	318.345
ENSG00000074800	ENO1	chr1:8921060-8939953	316.303
ENSG00000101608	MYL12A	chr18:3247478-3261848	313.528
ENSG00000106333	PCOLCE	chr7:100169854-100205798	312.192
ENSG00000123416	TUBA1B	chr12:49521564-49541652	309.298
ENSG00000254772	EEF1G	chr11:62327072-62359649	307.456
ENSG00000163466	ARPC2	chr2:219081816-219119079	306.152
ENSG00000143933	CALM2	chr2:47126413-47403740	306.069
ENSG00000185624	P4HB	chr17:79801034-79818570	305.316
ENSG00000211673	IGLV3-1	chr22:23222885-23223576	302.507
ENSG00000167468	GPX4	chr19:1103935-1106787	299.181
ENSG00000181163	NPM1	chr5:170814119-170838141	294.815
ENSG00000067225	PKM	chr15:72491369-72524164	294.805
ENSG00000180879	SSR4	chrX:153051220-153063960	294.596
ENSG00000109971	HSPA8	chr11:122928196-122933938	291.58
ENSG00000212802	RPL15P3	chr6:12514341-12515006	291.087
ENSG00000099622	CIRBP	chr19:1259383-1274879	290.023
ENSG00000211772	TRBC2	chr7:142498724-142500432	288.45
ENSG00000169045	HNRNPH1	chr5:179041178-179061785	288.007
ENSG00000242071	RPL7AP6	chr14:70320847-70499083	287.207
ENSG00000127184	COX7C	chr5:85913720-85916779	284.663
ENSG00000160255	ITGB2	chr21:46305867-46351904	284.585
ENSG00000091986	CCDC80	chr3:112323406-112368377	283.95
ENSG00000219200	RNASEK	chr17:6757179-6922978	283.607
ENSG00000117450	PRDX1	chr1:45959537-45988719	283.293
ENSG00000226221	AC022431.1	chr5:55800461-55800899	283.113
ENSG00000131981	LGALS3	chr14:55590827-55612126	282.677
ENSG00000167978	SRRM2	chr16:2787076-2827298	281.969
ENSG00000105373	GLTSCR2	chr19:48248778-48272097	280.592
ENSG00000136235	GPNMB	chr7:23275585-23314727	278.187
ENSG00000084207	GSTP1	chr11:67351065-67354131	276.699
ENSG00000114353	GNAI2	chr3:50263723-50296787	276.037
ENSG00000213178	RP11-641D5.1	chr3:168801286-169381406	276.005
ENSG00000077942	FBLN1	chr22:45898117-45997015	273.943
ENSG00000139239	RPL14P1	chr12:63359094-63359764	272.046
ENSG00000110484	SCGB2A2	chr11:62037626-62040628	271.441
ENSG00000171863	RPS7	chr2:3622794-3628509	270.321
ENSG00000103811	CTSH	chr15:79213399-79241916	268.129
ENSG00000129226	CD68	chr17:7465191-7536700	266.452
ENSG00000163430	FSTL1	chr3:120111139-120170100	265.832
ENSG00000211953	IGHV3-30	chr14:106791004-106791536	265.477
ENSG00000103187	COTL1	chr16:84599199-84651683	265.02
ENSG00000135390	ATP5G2	chr12:54026509-54071192	263.774
ENSG00000115461	IGFBP5	chr2:217536827-217858802	261.425
ENSG00000105223	PLD3	chr19:40825442-40896094	261.31
ENSG00000145741	BTF3	chr5:72794232-72801460	260.791
ENSG00000042493	CAPG	chr2:85621870-85645555	259.381
ENSG00000166033	HTRA1	chr10:124221040-124274424	259.149
ENSG00000170458	CD14	chr5:140011312-140013286	257.976
ENSG00000125148	MT2A	chr16:56642110-56643409	257.57
ENSG00000124614	RPS10	chr6:34247455-34393902	256.44
ENSG00000203875	SNHG5	chr6:86370709-86388451	256.398
ENSG00000243678	NME1-NME2	chr17:49230896-49249108	255.875
ENSG00000196230	TUBB	chr6:30687977-30693203	254.608
ENSG00000134333	LDHA	chr11:18415934-18429972	254.395
ENSG00000179218	CALR	chr19:13049391-13055303	252.572
ENSG00000243290	IGKV1-12	chr2:89339720-89340242	252.476
ENSG00000163359	COL6A3	chr2:238232645-238323018	251.942
ENSG00000197111	PCBP2	chr12:53835388-53893847	249.568
ENSG00000176340	COX8A	chr11:63742078-63933578	248.635
ENSG00000204642	HLA-F	chr6:29690551-29716826	247.722
ENSG00000125534	PPDPF	chr20:62152076-62153559	247.332
ENSG00000139644	TMBIM6	chr12:49962000-50158717	246.966
ENSG00000183283	DAZAP2	chr12:51632075-51665146	245.272
ENSG00000110955	ATP5B	chr12:57031958-57039798	245.072
ENSG00000196262	PPIA	chr7:44836278-44864163	241.761
ENSG00000110077	MS4A6A	chr11:59939080-59952139	241.361
ENSG00000165949	IFI27	chr14:94571181-94583033	240.894
ENSG00000242574	HLA-DMB	chr6:32902405-32949282	239.569
ENSG00000100129	EIF3L	chr22:38226861-38285414	238.08
ENSG00000175061	FAM211A-AS1	chr17:16342135-16395467	237.73
ENSG00000136167	LCP1	chr13:46700054-46786006	237.685
ENSG00000164111	ANXA5	chr4:122589109-122618268	236.703
ENSG00000167460	TPM4	chr19:16177830-16213813	236.531
ENSG00000089009	RPL6	chr12:112842993-112947717	235.952
ENSG00000065978	YBX1	chr1:43148097-43168020	235.504
ENSG00000199753	SNORD104	chr17:62223329-62223836	234.214
ENSG00000233927	RPS28	chr19:8367010-8408146	232.645
ENSG00000150991	UBC	chr12:125396149-125401914	232.021
ENSG00000102317	RBM3	chrX:48431481-48437454	232.012
ENSG00000109861	CTSC	chr11:88026759-88070955	231.745
ENSG00000122566	HNRNPA2B1	chr7:26229546-26252976	230.106
ENSG00000163815	CLEC3B	chr3:44956748-45077563	228.146
ENSG00000166598	HSP90B1	chr12:104235228-104359486	227.231
ENSG00000100219	XBP1	chr22:29190542-29196585	224.739
ENSG00000152518	ZFP36L2	chr2:43393799-43823185	224.001
ENSG00000100979	PLTP	chr20:44517263-44540794	223.954
ENSG00000106538	RARRES2	chr7:150035407-150038763	223.052
ENSG00000185883	ATP6V0C	chr16:2525146-2581423	222.839
ENSG00000115524	SF3B1	chr2:198254507-198299815	222.111
ENSG00000135821	GLUL	chr1:182350838-182361341	221.409
ENSG00000100201	DDX17	chr22:38864066-38903665	220.131
ENSG00000198242	RPL23A	chr17:27046410-27070473	219.235
ENSG00000075415	SLC25A3	chr12:98987368-98995946	218.978
ENSG00000102879	CORO1A	chr16:30194147-30200397	218.001
ENSG00000026508	CD44	chr11:35160416-35253949	216.623
ENSG00000185885	IFITM1	chr11:307630-315272	216.469
ENSG00000100650	SRSF5	chr14:70193616-70238722	215.768
ENSG00000161570	CCL5	chr17:34195970-34212867	214.702
ENSG00000159763	PIP	chr7:142829169-142836839	213.373
ENSG00000104964	AES	chr19:3052907-3063105	211.973
ENSG00000068697	LAPTM4A	chr2:20232410-20251789	210.892
ENSG00000111229	ARPC3	chr12:110810704-110888227	210.678
ENSG00000228474	OST4	chr2:27265231-27294641	210.586
ENSG00000161960	EIF4A1	chr17:7465191-7536700	210.483
ENSG00000130592	LSP1	chr11:1874199-1913497	210.414
ENSG00000142227	EMP3	chr19:48799713-48833810	209.547
ENSG00000164530	PI16	chr6:36922208-36932613	209.405
ENSG00000143761	ARF1	chr1:228270360-228286912	209.358
ENSG00000157227	MMP14	chr14:23305765-23318236	208.21
ENSG00000104870	FCGRT	chr19:50010072-50029590	206.889
ENSG00000106211	HSPB1	chr7:75931860-75933612	206.441
ENSG00000106624	AEBP1	chr7:44143959-44154161	206.276
ENSG00000235552	RPL6P27	chr18:6462142-6463014	205.963
ENSG00000168028	RPSA	chr3:39448179-39454033	205.393
ENSG00000072778	ACADVL	chr17:7093208-7128592	204.137
ENSG00000149591	TAGLN	chr11:117070036-117103241	201.811
ENSG00000064205	WISP2	chr20:43285091-43379675	201.523
ENSG00000171223	JUNB	chr19:12873816-12985765	200.847
ENSG00000204196	AC011737.2	chr2:203879601-204091101	199.937
ENSG00000118680	MYL12B	chr18:3261906-3278282	199.45
ENSG00000165502	RPL36AL	chr14:50085236-50087403	198.343
ENSG00000164932	CTHRC1	chr8:104383742-104395225	198.304
ENSG00000184897	H1FX	chr3:129033614-129045068	197.859
ENSG00000241468	ATP5J2	chr7:98923520-99063954	197.006
ENSG00000163220	S100A9	chr1:153330329-153333503	196.992
ENSG00000143119	CD53	chr1:111415774-111442550	196.789
ENSG00000185650	ZFP36L1	chr14:69254376-69263190	195.964
ENSG00000120885	CLU	chr8:27454433-27472548	195.246
ENSG00000126247	CAPNS1	chr19:36630476-36641255	195.094
ENSG00000130635	COL5A1	chr9:137533619-137736686	194.778
ENSG00000205246	RPSAP58	chr19:23945745-24057503	194.549
ENSG00000233762	AC007969.5	chr2:172373748-172374232	194.378
ENSG00000227008	RP3-417G15.1	chrX:132669772-133119922	194.286
ENSG00000169714	CNBP	chr3:128888326-128902765	193.849
ENSG00000165140	FBP1	chr9:97365414-97402531	193.284
ENSG00000141522	ARHGDIA	chr17:79825596-79829282	193.271
ENSG00000240972	MIF	chr22:24198613-24241117	192.956
ENSG00000234664	HMGN2P5	chr15:29991570-30261068	192.506
ENSG00000114942	EEF1B2	chr2:206979540-207027652	192.339
ENSG00000133048	CHI3L1	chr1:203148058-203155877	191.874
ENSG00000240382	IGKV1-17	chr2:89416832-89417335	191.831
ENSG00000110321	EIF4G2	chr11:10804859-10830657	191.383
ENSG00000140105	WARS	chr14:100800124-100996640	190.985
ENSG00000231991	ANXA2P2	chr9:33624222-33625532	190.355
ENSG00000167004	PDIA3	chr15:44019115-44095241	188.574
ENSG00000010327	STAB1	chr3:52529353-52742182	188.222
ENSG00000100234	TIMP3	chr22:32908538-33454358	187.965
ENSG00000128272	ATF4	chr22:39915699-39918691	187.75
ENSG00000164924	YWHAZ	chr8:101928752-101965616	187.731
ENSG00000211955	IGHV3-33	chr14:106815721-106816253	187.296
ENSG00000085063	CD59	chr11:33719806-33757991	186.267
ENSG00000146677	AC004453.8	chr7:44418719-44530479	186.249
ENSG00000213719	CLIC1	chr6:31694814-31707540	186.248
ENSG00000181524	RPL24P4	chr6:42924082-42924503	184.686
ENSG00000143549	TPM3	chr1:154127783-154167124	184.683
ENSG00000108679	LGALS3BP	chr17:76967319-76976191	184.504
ENSG00000102144	PGK1	chrX:77320684-77384793	184.282
ENSG00000218175	AC016739.2	chr2:177065635-177065980	184.029
ENSG00000169564	PCBP1	chr2:70187225-70316332	183.959
ENSG00000088832	FKBP1A	chr20:1290618-1373806	183.89
ENSG00000111669	TPI1	chr12:6976282-7032861	183.413
ENSG00000110719	TCIRG1	chr11:67806482-67888911	183.046
ENSG00000077549	CAPZB	chr1:19665266-19812066	182.815
ENSG00000147065	MSN	chrX:64808256-64961791	182.168
ENSG00000162576	MXRA8	chr1:1288068-1297157	182.021
ENSG00000211945	IGHV1-18	chr14:106641562-106642056	181.873
ENSG00000160932	LY6E	chr8:144063154-144105249	181.244
ENSG00000166482	MFAP4	chr17:19240866-19290553	181.048
ENSG00000100300	TSPO	chr22:43547519-43559248	180.802
ENSG00000163479	SSR2	chr1:155978838-155990750	180.185
ENSG00000172270	BSG	chr19:567211-583493	179.481
ENSG00000175567	UCP2	chr11:73685711-73694352	179.256
ENSG00000143774	GUK1	chr1:228327662-228336685	179.169
ENSG00000231475	IGHV4-31	chr14:106805208-106805716	178.525
ENSG00000107317	PTGDS	chr9:139871955-139880862	178.021
ENSG00000235297	FAUP1	chr18:72057118-72057532	177.759
ENSG00000130522	JUND	chr19:18390562-18392432	177.506
ENSG00000237264	FTH1P11	chr8:82351670-82445510	176.528
ENSG00000239264	TXNDC5	chr6:7727029-8102811	175.473
ENSG00000152234	ATP5A1	chr18:43664109-43708299	174.804
ENSG00000155368	DBI	chr2:120124496-120130126	173.75
ENSG00000129824	RPS4Y1	chrY:2709526-2800041	173.265
ENSG00000107223	EDF1	chr9:139756570-139760738	172.057
ENSG00000133872	TMEM66	chr8:29920527-29940983	172.048
ENSG00000182087	TMEM259	chr19:999600-1021117	171.477
ENSG00000135486	HNRNPA1	chr12:54624723-54745633	171.361
ENSG00000229119	CTB-63M22.1	chr5:165809309-165809604	171.338
ENSG00000135046	ANXA1	chr9:75766672-75785309	170.002
ENSG00000197448	GSTK1	chr7:142941185-142985141	169.847
ENSG00000089280	FUS	chr16:31191430-31203127	169.598
ENSG00000120708	TGFBI	chr5:135364583-135399507	169.524
ENSG00000159840	ZYX	chr7:143078172-143220542	169.442
ENSG00000159377	PSMB4	chr1:151372009-151374420	169.343
ENSG00000240864	IGKV1-16	chr2:89399351-89399854	169.013
ENSG00000198563	DDX39B	chr6:31496493-31526606	168.563
ENSG00000175899	A2M	chr12:9217772-9268825	168.301
ENSG00000178719	GRINA	chr8:145051320-145101933	167.761
ENSG00000131446	MGAT1	chr5:180217540-180242652	167.315
ENSG00000166741	NNMT	chr11:113930314-114227293	167.243
ENSG00000211652	IGLV7-43	chr22:22749355-22749827	167.206
ENSG00000123144	C19orf43	chr19:12841453-12845589	167.134
ENSG00000100985	MMP9	chr20:44637546-44688784	166.838
ENSG00000203747	FCGR3A	chr1:161475219-161648444	165.645
ENSG00000204472	AIF1	chr6:31582960-31584798	165.475
ENSG00000093072	CECR1	chr22:17660193-17702879	165.458
ENSG00000196405	EVL	chr14:100437785-100610573	165.38
ENSG00000137575	SDCBP	chr8:59465482-59495419	165.043
ENSG00000100600	LGMN	chr14:93170151-93215047	164.817
ENSG00000115310	RTN4	chr2:55199324-55339757	164.745
ENSG00000005022	SLC25A5	chrX:118599996-118605282	164.642
ENSG00000113732	ATP6V0E1	chr5:172410759-172462448	164.289
ENSG00000165119	HNRNPK	chr9:86582997-86595569	164.125
ENSG00000169020	ATP5I	chr4:666224-683230	163.992
ENSG00000189058	APOD	chr3:195295572-195311076	163.499
ENSG00000230202	RP11-632C17__A.1	chr6:118228688-118638839	162.683
ENSG00000172037	LAMB2	chr3:49158546-49170551	162.575
ENSG00000126267	COX6B1	chr19:36139124-36149763	162.421
ENSG00000131236	CAP1	chr1:40505904-40538321	162.404
ENSG00000164713	BRI3	chr7:97881690-98030380	162.148
ENSG00000104894	CD37	chr19:49834873-49891338	162.051
ENSG00000126264	HCST	chr19:36393381-36395279	161.457
ENSG00000198668	CALM1	chr14:90862845-90874605	161.318
ENSG00000132507	EIF5A	chr17:7210317-7232712	161.051
ENSG00000145425	RPS3A	chr4:152020724-152246784	160.806
ENSG00000187109	NAP1L1	chr12:76438669-76478813	160.554
ENSG00000076928	ARHGEF1	chr19:42387227-42434302	160.404
ENSG00000189067	LITAF	chr16:11641852-11730237	160.391
ENSG00000106565	TMEM176B	chr7:150488372-150502208	160.362
ENSG00000162704	ARPC5	chr1:183592400-183604892	159.709
ENSG00000231767	MIR4426	chr1:192685312-192685783	159.042
ENSG00000198502	HLA-DRB5	chr6:32485119-32498064	158.231
ENSG00000116251	RPL22	chr1:6241328-6296032	157.627
ENSG00000102575	ACP5	chr19:11670188-11729950	156.877
ENSG00000133639	BTG1	chr12:92378755-92583436	156.61
ENSG00000241553	ARPC4	chr3:9791627-9896822	155.079
ENSG00000240509	RPL34P18	chr8:94969565-94969919	154.853
ENSG00000157514	TSC22D3	chrX:106956450-107020572	154.798
ENSG00000226084	RP4-706A16.3	chr1:77554674-77685115	154.739
ENSG00000133063	CHIT1	chr1:203181954-203242769	154.653
ENSG00000244575	IGKV1-27	chr2:89512907-89513413	154.628
ENSG00000168385	37500	chr2:242166678-242293442	154.545
ENSG00000173915	USMG5	chr10:105127723-105156223	154.5
ENSG00000161547	SRSF2	chr17:74722911-74777531	153.939
ENSG00000167615	LENG8	chr19:54955990-54974894	153.458
ENSG00000152795	HNRNPDL	chr4:83343716-83351294	153.154
ENSG00000154096	THY1	chr11:119252487-119397374	152.695
ENSG00000143384	MCL1	chr1:150547031-150552066	152.048
ENSG00000115415	STAT1	chr2:191745522-191885686	152.006
ENSG00000143546	S100A8	chr1:153362507-153363664	151.969
ENSG00000130208	APOC1	chr19:45417503-45422606	151.77
ENSG00000064666	CNN2	chr19:1026297-1039068	151.189
ENSG00000198832	SELM	chr22:31500757-31516055	150.751
ENSG00000092010	PSME1	chr14:24605366-24610797	150.572
ENSG00000049540	ELN	chr7:73442118-73484237	150.569
ENSG00000135506	OS9	chr12:58087737-58115340	150.505
ENSG00000106153	CHCHD2	chr7:56169261-56174269	150.039
ENSG00000172354	GNB2	chr7:100271153-100276797	150.001
ENSG00000185834	RPL12P4	chr20:53691154-53691685	149.485
ENSG00000089327	FXYD5	chr19:35645632-35660786	149.116
ENSG00000174807	CD248	chr11:66080323-66086708	148.85
ENSG00000229164	TRAC	chr14:23016446-23021097	148.165
ENSG00000107796	ACTA2	chr10:90639490-90775542	147.836
ENSG00000232187	FTH1P7	chr13:23270161-23270713	147.74
ENSG00000164919	COX6C	chr8:100025493-100906290	147.687
ENSG00000121966	CXCR4	chr2:136871918-136875735	147.676
ENSG00000096384	HSP90AB1	chr6:44214823-44221620	147.283
ENSG00000240583	AQP1	chr7:30692199-30965131	147.28
ENSG00000176978	DPP7	chr9:140004993-140009629	146.875
ENSG00000242766	IGKV1D-17	chr2:90121476-90122133	146.493
ENSG00000118640	VAMP8	chr2:85788684-85809154	146.483
ENSG00000140319	SRP14	chr15:40327939-40331389	146.105
ENSG00000172216	CEBPB	chr20:48807375-48809212	145.597
ENSG00000101335	MYL9	chr20:34894257-35274619	145.068
ENSG00000115677	HDLBP	chr2:242166678-242293442	144.351
ENSG00000265681	RPL17	chr18:47008027-47018906	144.241
ENSG00000106803	SEC61B	chr9:101984345-101992897	144.135
ENSG00000156976	EIF4A2	chr3:186499568-186524847	143.894
ENSG00000136490	LIMD2	chr17:61699774-61778532	142.257
ENSG00000128524	ATP6V1F	chr7:128470430-128550773	142.243
ENSG00000070831	CDC42	chr1:22379119-22419437	141.4
ENSG00000198258	UBL5	chr19:9938567-9940791	141.112
ENSG00000196683	TOMM7	chr7:22852250-22862470	140.813
ENSG00000104805	NUCB1	chr19:49403306-49426629	140.663
ENSG00000104408	EIF3E	chr8:109213444-109447562	140.619
ENSG00000105640	RPL18A	chr19:17970684-17974962	140.484
ENSG00000266714	MYO15B	chr17:73584138-73704142	140.425
ENSG00000159335	PTMS	chr12:6857169-6880116	140.407
ENSG00000170801	HTRA3	chr4:8271491-8308838	139.931
ENSG00000244716	RP11-20O24.4	chr1:109512835-109584850	139.588
ENSG00000146066	HIGD2A	chr5:175792470-175843570	139.491
ENSG00000066336	SPI1	chr11:47376410-47400127	139.336
ENSG00000128016	ZFP36	chr19:39897452-39900052	138.323
ENSG00000211956	IGHV4-34	chr14:106829593-106830076	138.072
ENSG00000229117	RPL41	chr12:56510369-56511727	137.413
ENSG00000178980	SEPW1	chr19:48281828-48287943	136.855
ENSG00000004399	PLXND1	chr3:129274017-129325661	136.407
ENSG00000149257	SERPINH1	chr11:75273100-75283828	136.365
ENSG00000111678	C12orf57	chr12:7052140-7055166	135.849
ENSG00000123384	LRP1	chr12:57482676-57607134	135.82
ENSG00000229638	RPL4P4	chr3:185000728-185216845	135.635
ENSG00000142192	APP	chr21:27252860-27589700	135.509
ENSG00000104852	SNRNP70	chr19:49588675-49611862	135.444
ENSG00000131171	SH3BGRL	chrX:80457441-80554046	135.339
ENSG00000105374	NKG7	chr19:51874859-51875969	135.222
ENSG00000160789	LMNA	chr1:156052363-156109880	134.756
ENSG00000126709	IFI6	chr1:27992571-27998729	134.665
ENSG00000174886	NDUFA11	chr19:5865836-5904017	134.617
ENSG00000107798	LIPA	chr10:90973325-91174314	134.592
ENSG00000170275	CRTAP	chr3:33155470-33189265	134.587
ENSG00000235655	H3F3AP4	chr2:175411868-175639555	134.422
ENSG00000240065	PSMB9	chr6:32808493-32827362	134.302
ENSG00000161203	AP2M1	chr3:183851806-184402546	133.752
ENSG00000100345	MYH9	chr22:36677326-36784063	133.593
ENSG00000115523	GNLY	chr2:85912297-85925977	133.53
ENSG00000185896	LAMP1	chr13:113951555-113977987	133.245
ENSG00000111716	LDHB	chr12:21788275-21928515	133.193
ENSG00000135047	CTSL	chr9:90340433-90346308	132.445
ENSG00000088986	DYNLL1	chr12:120907652-120936296	132.425
ENSG00000135535	CD164	chr6:109687716-109703762	132.191
ENSG00000124935	SCGB1D2	chr11:61976139-62028021	132.013
ENSG00000158747	NBL1	chr1:19923472-19984945	131.525
ENSG00000178982	EIF3K	chr19:39109734-39127595	131.365
ENSG00000008517	IL32	chr16:3115297-3137101	131.29
ENSG00000100906	NFKBIA	chr14:35870716-35873955	130.999
ENSG00000231925	TAPBP	chr6:33267470-33282164	130.97
ENSG00000165168	CYBB	chrX:37208527-38548169	130.898
ENSG00000198830	HMGN2	chr1:26798940-26802463	130.594
ENSG00000168374	ARF4	chr3:57557089-57586654	130.316
ENSG00000113558	SKP1	chr5:133450401-133706738	130.196
ENSG00000129009	ISLR	chr15:74445140-74471567	130.156
ENSG00000049860	HEXB	chr5:73923233-74072737	130.143
ENSG00000211942	IGHV3-13	chr14:106586136-106586667	129.836
ENSG00000135940	COX5B	chr2:98262502-98264846	129.722
ENSG00000092199	HNRNPC	chr14:21677294-21737653	129.653
ENSG00000163520	FBLN2	chr3:13573823-13679922	129.528
ENSG00000189343	RPS2P46	chr17:19342455-19364308	129.026
ENSG00000129562	DAD1	chr14:23033804-23058175	128.772
ENSG00000211952	IGHV4-28	chr14:106780512-106781017	128.362
ENSG00000254999	BRK1	chr3:10157275-10168874	128.335
ENSG00000122359	ANXA11	chr10:81910644-81965328	128.24
ENSG00000188257	PLA2G2A	chr1:20301924-20306932	128.126
ENSG00000177469	PTRF	chr17:40554469-40575535	127.815
ENSG00000009307	CSDE1	chr1:115259533-115301297	127.787
ENSG00000179010	MRFAP1	chr4:6641817-6644472	127.764
ENSG00000143196	DPT	chr1:168664696-168698502	127.665
ENSG00000211935	IGHV1-3	chr14:106471245-106471723	127.48
ENSG00000170323	FABP4	chr8:82351670-82445510	127.217
ENSG00000172724	CCL19	chr9:34689563-34691274	127.076
ENSG00000156467	UQCRB	chr8:97238147-97250262	126.864
ENSG00000051108	HERPUD1	chr16:56965959-56977798	126.641
ENSG00000169567	HINT1	chr5:130494719-130541119	126.603
ENSG00000163463	KRTCAP2	chr1:155141883-155162707	126.601
ENSG00000104763	ASAH1	chr8:17913933-17953903	126.434
ENSG00000131051	RBM39	chr20:34291530-34330234	126.215
ENSG00000197249	SERPINA1	chr14:94843083-94857030	126.151
ENSG00000078369	GNB1	chr1:1716728-1822495	125.808
ENSG00000148175	STOM	chr9:124101354-124132531	125.345
ENSG00000155130	MARCKS	chr6:114178540-114184648	125.122
ENSG00000144746	ARL6IP5	chr3:69134094-69155217	124.921
ENSG00000175390	EIF3F	chr11:7991797-8023409	124.781
ENSG00000211890	IGHA2	chr14:106053225-106054732	124.388
ENSG00000116560	SFPQ	chr1:35641978-35658749	124.154
ENSG00000143162	CREG1	chr1:167498913-167523004	123.994
ENSG00000183648	NDUFB1	chr14:92582465-92588261	123.735
ENSG00000169245	CXCL10	chr4:76932336-77033955	123.071
ENSG00000127022	CANX	chr5:179105583-179157926	122.967
ENSG00000167552	TUBA1A	chr12:49578578-49667114	122.387
ENSG00000110492	MDK	chr11:46402305-46405375	122.137
ENSG00000090266	NDUFB2	chr7:140218219-140624564	121.964
ENSG00000108639	SYNGR2	chr17:76164638-76169608	121.906
ENSG00000103363	TCEB2	chr16:2787076-2827298	121.785
ENSG00000214485	RPL7P1	chr5:149432853-149492935	121.74
ENSG00000138071	ACTR2	chr2:65454886-65498387	121.32
ENSG00000182220	ATP6AP2	chrX:40440145-40465889	121.31
ENSG00000227507	LTB	chr6:31548301-31550299	120.943
ENSG00000136003	ISCU	chr12:108956357-108963160	120.779
ENSG00000117410	ATP6V0B	chr1:44440158-44443967	120.447
ENSG00000178741	COX5A	chr15:75212131-75230509	120.356
ENSG00000166913	YWHAB	chr20:43514316-43537173	119.864
ENSG00000150593	PDCD4	chr10:112629500-112679032	119.807
ENSG00000100911	PSME2	chr14:24612573-24636611	119.775
ENSG00000232472	EEF1B2P3	chrX:24712035-25015103	119.565
ENSG00000100243	CYB5R3	chr22:43013845-43045574	119.357
ENSG00000198918	RPL39	chrX:118920466-118925606	118.804
ENSG00000152082	MZT2B	chr2:130908980-130948302	118.787
ENSG00000075785	RAB7A	chr3:128444964-128533639	118.713
ENSG00000125868	DSTN	chr20:17550507-17590564	118.142
ENSG00000151366	NDUFC2	chr11:77726760-77791265	118.026
ENSG00000002549	LAP3	chr4:17578814-17616194	118.025
ENSG00000112335	SNX3	chr6:108532425-108582464	117.948
ENSG00000118816	CCNI	chr4:77968310-77997158	117.776
ENSG00000154518	ATP5G3	chr2:176040985-176049335	117.666
ENSG00000010278	CD9	chr12:6308880-6347425	117.537
ENSG00000105401	CDC37	chr19:10501809-10580305	117.092
ENSG00000162734	PEA15	chr1:160171988-160185166	117.058
ENSG00000101182	PSMA7	chr20:60711790-60718496	116.911
ENSG00000067167	TRAM1	chr8:71485676-71520622	116.888
ENSG00000105404	RABAC1	chr19:42460832-42463542	116.653
ENSG00000111275	ALDH2	chr12:112123856-112247782	116.507
ENSG00000113648	H2AFY	chr5:134363424-134736986	116.386
ENSG00000105438	KDELR1	chr19:48885826-48894810	116.226
ENSG00000177575	CD163	chr12:7499280-7656489	115.953
ENSG00000089820	ARHGAP4	chrX:153126968-153200676	115.817
ENSG00000023191	RNH1	chr11:494511-507300	115.774
ENSG00000259261	IGHV4OR15-8	chr15:22472917-22473353	115.728
ENSG00000142552	RCN3	chr19:50030874-50050219	115.635
ENSG00000147677	EIF3H	chr8:117654368-117889107	115.586
ENSG00000174021	GNG5	chr1:84964007-85040163	115.538
ENSG00000125743	SNRPD2	chr19:46190711-46207247	115.471
ENSG00000136810	TXN	chr9:113006090-113018920	115.359
ENSG00000229230	MT1P3	chr20:33703166-33872788	115.23
ENSG00000114902	SPCS1	chr3:52529353-52742182	115.121
ENSG00000269242	CTD-2192J16.22	chr19:12754088-12792716	115.103
ENSG00000146278	PNRC1	chr6:89790469-89794879	114.965
ENSG00000167283	ATP5L	chr11:118230299-118302211	114.562
ENSG00000116209	TMEM59	chr1:54497346-54519177	114.353
ENSG00000135218	CD36	chr7:79959507-80308593	114.246
ENSG00000118523	CTGF	chr6:132269315-132398533	114.237
ENSG00000184640	40057	chr17:75253818-75496678	113.922
ENSG00000168961	LGALS9	chr17:25783669-25976586	113.917
ENSG00000228929	RP11-159C21.4	chr1:53192125-53293014	113.916
ENSG00000099624	ATP5D	chr19:1241748-1244824	113.653
ENSG00000105397	TYK2	chr19:10461208-10491352	113.651
ENSG00000089220	PEBP1	chr12:118501397-118583389	113.429
ENSG00000116459	ATP5F1	chr1:111981259-112005395	113.382
ENSG00000205220	PSMB10	chr16:67927174-67970990	113.262
ENSG00000157873	TNFRSF14	chr1:2481358-2496821	113.212
ENSG00000019169	MARCO	chr2:119699741-119752236	113.166
ENSG00000117448	AKR1A1	chr1:46016214-46035721	113.158
ENSG00000104824	HNRNPL	chr19:39306061-39342987	113.151
ENSG00000064601	CTSA	chr20:44517263-44540794	113.082
ENSG00000183255	PTTG1IP	chr21:46269499-46293752	112.903
ENSG00000138668	HNRNPD	chr4:83273650-83305180	112.828
ENSG00000104774	MAN2B1	chr19:12754088-12792716	112.789
ENSG00000180353	HCLS1	chr3:121350245-121379774	112.601
ENSG00000081237	PTPRC	chr1:198607800-198726545	112.113
ENSG00000173020	ADRBK1	chr11:67033880-67054027	112.085
ENSG00000211644	IGLV1-51	chr22:22657588-22677336	112.027
ENSG00000090520	DNAJB11	chr3:186256229-186315061	111.982
ENSG00000136238	RAC1	chr7:6414153-6443608	111.811
ENSG00000176845	METRNL	chr17:81037566-81052864	111.798
ENSG00000166147	FBN1	chr15:48700502-48938046	111.613
ENSG00000168653	NDUFS5	chr1:39491989-39500308	111.597
ENSG00000148248	SURF4	chr9:136228324-136242970	111.587
ENSG00000105701	FKBP8	chr19:18642422-18654887	111.464
ENSG00000124357	NAGK	chr2:71163011-71306935	111.413
ENSG00000143878	RHOB	chr2:20646834-20649200	111.313
ENSG00000113387	SUB1	chr5:32531738-32604185	111.303
ENSG00000136859	ANGPTL2	chr9:129677052-129985445	111.168
ENSG00000224650	IGHV3-74	chr14:107218675-107219365	110.909
ENSG00000099795	NDUFB7	chr19:14676889-14682874	110.692
ENSG00000204264	PSMB8	chr6:32808493-32827362	110.158
ENSG00000168066	SF1	chr11:64532077-64546258	110.138
ENSG00000131238	PPT1	chr1:40538378-40563375	110.122
ENSG00000197744	PTMAP2	chr5:118173016-118324240	110.122
ENSG00000011304	PTBP1	chr19:797074-812327	110.107
ENSG00000023902	PLEKHO1	chr1:150121372-150136916	109.933
ENSG00000241837	ATP5O	chr21:34876237-35349992	109.869
ENSG00000221978	CCNL2	chr1:1321090-1334708	109.739
ENSG00000213928	IRF9	chr14:24612573-24636611	109.616
ENSG00000128340	RAC2	chr22:37621300-37640488	109.601
ENSG00000115935	WIPF1	chr2:175411868-175639555	108.904
ENSG00000126432	PRDX5	chr11:64085559-64089283	108.507
ENSG00000109332	UBE2D3	chr4:103715539-103790053	108.242
ENSG00000038427	VCAN	chr5:82767283-82878122	108.057
ENSG00000166340	TPP1	chr11:6633999-6640995	107.971
ENSG00000211947	IGHV3-21	chr14:106691672-106692203	107.698
ENSG00000159674	SPON2	chr4:1160719-1202750	107.685
ENSG00000109046	WSB1	chr17:25621101-25640657	107.477
ENSG00000132432	SEC61G	chr7:54819942-54872621	106.87
ENSG00000122705	CLTA	chr9:36190852-36304921	106.438
ENSG00000235912	RP1-159A19.3	chr1:27975929-27976121	105.675
ENSG00000140575	IQGAP1	chr15:90931449-91045475	105.549
ENSG00000124942	AHNAK	chr11:62201015-62323707	105.468
ENSG00000058262	SEC61A1	chr3:127770483-128127485	105.445
ENSG00000134825	TMEM258	chr11:61447904-61634826	105.123
ENSG00000108946	PRKAR1A	chr17:66255322-66760023	105.073
ENSG00000084234	APLP2	chr11:129936835-130014699	105.044
ENSG00000182871	COL18A1	chr21:46825051-46964325	104.857
ENSG00000205352	PRR13	chr12:53835388-53893847	104.44
ENSG00000149100	EIF3M	chr11:32605343-32816204	104.418
ENSG00000244038	DDOST	chr1:20959947-20988000	104.261
ENSG00000183291	42248	chr1:87328131-87380107	104.239
ENSG00000168899	VAMP5	chr2:85811530-85820535	104.235
ENSG00000111775	COX6A1	chr12:120875892-120899389	104.034
ENSG00000189403	HMGB1	chr13:31032883-31191734	104.022
ENSG00000008018	PSMB1	chr6:170844204-170862429	103.958
ENSG00000090238	YPEL3	chr16:30103634-30115437	103.936
ENSG00000116288	PARK7	chr1:8014350-8045565	103.76
ENSG00000204262	COL5A2	chr2:189896621-190044605	103.721
ENSG00000127528	KLF2	chr19:16435627-16438685	103.609
ENSG00000155366	RHOC	chr1:113243727-113258099	103.584
ENSG00000211640	IGLV6-57	chr22:22550112-22550860	103.539
ENSG00000173821	RNF213	chr17:78234664-78411886	103.531
ENSG00000239855	IGKV1-6	chr2:89265780-89266286	103.343
ENSG00000108953	YWHAE	chr17:1247565-1303672	103.321
ENSG00000172053	QARS	chr3:49133364-49142553	103.306
ENSG00000125991	ERGIC3	chr20:34129769-34145405	103.26
ENSG00000010610	CD4	chr12:6896023-6929974	103.197
ENSG00000071127	WDR1	chr4:10075962-10118573	103.047
ENSG00000042753	AP2S1	chr19:47341392-47354249	102.969
ENSG00000173511	VEGFB	chr11:64002009-64006259	102.901
ENSG00000211611	IGKV6-21	chr2:89459234-89459850	102.772
ENSG00000130175	PRKCSH	chr19:11531271-11561783	102.549
ENSG00000150687	PRSS23	chr11:86502100-86666433	102.374
ENSG00000105698	USF2	chr19:35759880-35770724	102.359
ENSG00000211936	IGHV4-4	chr14:106478109-106478603	102.248
ENSG00000211946	IGHV3-20	chr14:106667580-106668095	102.038
ENSG00000177954	RPS27	chr1:153963234-153964626	102.032
ENSG00000090621	PABPC4	chr1:40026487-40042462	101.818
ENSG00000130811	EIF3G	chr19:10216898-10230596	101.758
ENSG00000109099	PMP22	chr17:15133094-15169024	101.553
ENSG00000101294	HM13	chr20:30102230-30161066	101.382
ENSG00000173113	TRMT112	chr11:64073043-64085556	101.254
ENSG00000011028	MRC2	chr17:60704761-60770958	101.195
ENSG00000109610	SOD3	chr4:24791533-24802464	100.939
ENSG00000164405	UQCRQ	chr5:132196872-132203723	100.656
ENSG00000121064	SCPEP1	chr17:55055465-55084129	100.628
ENSG00000134871	COL4A2	chr13:110801317-111165374	100.571
ENSG00000115053	NCL	chr2:232318241-232348352	100.432
ENSG00000062716	VMP1	chr17:57697218-57919616	100.392
ENSG00000163399	ATP1A1	chr1:116915289-116961244	100.199
ENSG00000142798	HSPG2	chr1:22138757-22263790	100.006
ENSG00000117362	APH1A	chr1:150237803-150253327	99.9922
ENSG00000214548	MEG3	chr14:101245746-101327368	99.9838
ENSG00000004059	ARF5	chr7:127220671-127242198	99.9389
ENSG00000148834	GSTO1	chr10:105995113-106027217	99.8821
ENSG00000138069	RAB1A	chr2:65283499-65357240	99.6597
ENSG00000156738	MS4A1	chr11:60223224-60238233	99.5768
ENSG00000112695	COX7A2	chr6:75947390-75960039	99.5
ENSG00000167792	NDUFV1	chr11:67374322-67380006	99.441
ENSG00000132274	TRIM22	chr11:5684424-5959849	99.409
ENSG00000204256	BRD2	chr6:32902405-32949282	98.9374
ENSG00000120129	DUSP1	chr5:172185228-172204777	98.8864
ENSG00000167397	VKORC1	chr16:31085742-31107301	98.7852
ENSG00000116754	SRSF11	chr1:70671364-70718735	98.7414
ENSG00000167863	ATP5H	chr17:73028669-73061984	98.6415
ENSG00000105583	WDR83OS	chr19:12754088-12792716	98.6159
ENSG00000167779	IGFBP6	chr12:53491219-53496129	98.5289
ENSG00000134884	ARGLU1	chr13:107194020-107220512	98.4903
ENSG00000140400	MAN2C1	chr15:75648132-75748183	98.4896
ENSG00000141480	ARRB2	chr17:4613783-4624794	98.3148
ENSG00000143543	JTB	chr1:153931574-153950164	98.2964
ENSG00000110446	SLC15A3	chr11:60680637-60720002	98.2487
ENSG00000084070	SMAP2	chr1:40810521-40888998	98.2116
ENSG00000213977	TAX1BP3	chr17:3566195-3599698	98.154
ENSG00000154451	GBP5	chr1:89724632-89738544	97.7934
ENSG00000129084	PSMA1	chr11:14464985-14665181	97.7183
ENSG00000214736	TOMM6	chr6:41737913-41863099	97.5964
ENSG00000176788	BASP1	chr5:17065706-17276943	97.5519
ENSG00000177697	CD151	chr11:818901-842545	97.4539
ENSG00000080824	HSP90AA1	chr14:102547074-102771537	97.272
ENSG00000171159	C9orf16	chr9:130922538-130926207	97.2622
ENSG00000073921	PICALM	chr11:85668726-85780924	97.2612
ENSG00000136240	KDELR2	chr7:6448756-6524873	97.2052
ENSG00000214063	TSPAN4	chr11:842807-867116	97.1178
ENSG00000184840	TMED9	chr5:177019158-177023125	96.8747
ENSG00000160014	CALM3	chr19:46984052-47114050	96.7237
ENSG00000188820	FAM26F	chr6:116781901-116784934	96.6863
ENSG00000116132	PRRX1	chr1:170631868-170708560	96.6118
ENSG00000170581	STAT2	chr12:56735380-56753939	96.5194
ENSG00000164054	SHISA5	chr3:48509196-48542259	96.3305
ENSG00000128595	CALU	chr7:128379345-128411861	96.1618
ENSG00000240834	IGKV1D-12	chr2:90198534-90199190	96.0554
ENSG00000088882	CPXM1	chr20:2774714-2781283	95.9862
ENSG00000117228	GBP1	chr1:89518001-89531043	95.9369
ENSG00000057608	GDI2	chr10:5807185-5884095	95.8957
ENSG00000123131	PRDX4	chrX:23682378-23704516	95.6352
ENSG00000113269	RNF130	chr5:179338650-179499118	95.5407
ENSG00000110324	IL10RA	chr11:117857062-117872196	95.5252
ENSG00000188186	LAMTOR4	chr7:99746529-99756338	95.1717
ENSG00000211964	IGHV3-48	chr14:106993813-106994346	95.1052
ENSG00000130770	ATPIF1	chr1:28562619-28573417	94.9744
ENSG00000182944	EWSR1	chr22:29655840-29696515	94.9532
ENSG00000134308	YWHAQ	chr2:9724100-9771143	94.9439
ENSG00000168394	TAP1	chr6:32808493-32827362	94.9109
ENSG00000182196	ARL6IP4	chr12:123405497-123467456	94.6988
ENSG00000105974	CAV1	chr7:116164838-116201233	94.6575
ENSG00000105369	CD79A	chr19:42381189-42385439	94.6557
ENSG00000161921	CXCL16	chr17:4634722-4643217	94.6231
ENSG00000170476	MZB1	chr5:138723168-138725770	94.5772
ENSG00000155659	VSIG4	chrX:65241579-65259967	94.4882
ENSG00000147168	IL2RG	chrX:70327253-70331958	94.4385
ENSG00000108294	PSMB3	chr17:36908988-36920484	94.3988
ENSG00000177731	FLII	chr17:18128900-18162230	93.8034
ENSG00000185825	BCAP31	chrX:152965946-152990152	93.4804
ENSG00000127951	FGL2	chr7:76139744-77045717	93.4084
ENSG00000213614	HEXA	chr15:72533521-72671129	93.334
ENSG00000130402	ACTN4	chr19:39138288-39260544	93.3056
ENSG00000244682	FCGR2C	chr1:161475219-161648444	93.2132
ENSG00000204435	CSNK2B	chr6:31629005-31641553	93.2107
ENSG00000130303	BST2	chr19:17513747-17516457	93.1691
ENSG00000182149	IST1	chr16:71879893-71962913	93.1165
ENSG00000166337	TAF10	chr11:6624871-6633898	93.0793
ENSG00000140612	SEC11A	chr15:85212774-85259947	93.0293
ENSG00000169976	SF3B5	chr6:144416017-144416754	93.0024
ENSG00000140416	TPM1	chr15:63334830-63364114	92.999
ENSG00000102096	PIM2	chrX:48770458-48776301	92.9226
ENSG00000164032	H2AFZ	chr4:100869242-101136662	92.8947
ENSG00000147140	NONO	chrX:70503041-70521018	92.8307
ENSG00000122545	39326	chr7:35840541-35944917	92.7607
ENSG00000180867	PDIA3P1	chr1:146644349-146767443	92.6626
ENSG00000132341	RAN	chr12:131356423-131362223	92.327
ENSG00000111679	PTPN6	chr12:7055630-7070479	92.2405
ENSG00000142634	EFHD2	chr1:15736390-15756839	92.2097
ENSG00000183160	TMEM119	chr12:108983621-108992096	92.2032
ENSG00000149781	FERMT3	chr11:63974149-64001824	92.1326
ENSG00000178927	C17orf62	chr17:80347098-80408705	91.8339
ENSG00000204103	MAFB	chr20:39314487-39317880	91.7802
ENSG00000147684	NDUFB9	chr8:125500725-125740730	91.7777
ENSG00000211445	GPX3	chr5:150400123-150408554	91.609
ENSG00000165629	ATP5C1	chr10:7830091-7849778	91.5862
ENSG00000150093	ITGB1	chr10:33189246-33371030	91.5398
ENSG00000117091	CD48	chr1:160639937-160681641	91.3249
ENSG00000204482	LST1	chr6:31553900-31560762	91.3195
ENSG00000122565	CBX3	chr7:26229546-26252976	91.2872
ENSG00000108774	RAB5C	chr17:40265125-40307990	91.2244
ENSG00000146112	PPP1R18	chr6:30644165-30655672	91.1091
ENSG00000156587	UBE2L6	chr11:57319128-57335757	91.0537
ENSG00000154723	ATP5J	chr21:27011583-27144771	90.9553
ENSG00000177156	TALDO1	chr11:747328-765024	90.9137
ENSG00000155957	TMBIM4	chr12:66516841-66563852	90.9073
ENSG00000137409	MTCH1	chr6:36935916-36954074	90.8899
ENSG00000204387	C6orf48	chr6:31802384-31807541	90.8094
ENSG00000143198	MGST3	chr1:165600097-165631033	90.7592
ENSG00000078808	SDF4	chr1:1152287-1167411	90.6981
ENSG00000166920	C15orf48	chr15:45722726-45878488	90.6147
ENSG00000138080	EMILIN1	chr2:27301434-27309271	90.5698
ENSG00000213402	PTPRCAP	chr11:67202980-67211292	90.4488
ENSG00000186010	NDUFA13	chr19:19623226-19648390	90.1274
ENSG00000143870	PDIA6	chr2:10861774-10978103	89.8768
ENSG00000177666	PNPLA2	chr11:818901-842545	89.8644
ENSG00000086598	TMED2	chr12:124066766-124083116	89.8184
ENSG00000116016	EPAS1	chr2:46520805-46613836	89.7909
ENSG00000268751	SCGB1B2P	chr19:35067637-35068606	89.7201
ENSG00000204463	BAG6	chr6:31606804-31625987	89.7129
ENSG00000134531	EMP1	chr12:13349649-13369708	89.4714
ENSG00000172531	PPP1CA	chr11:67159175-67193078	89.3124
ENSG00000149932	TMEM219	chr16:29952205-29984373	89.2657
ENSG00000131669	NINJ1	chr9:95883770-95896570	89.2231
ENSG00000196743	GM2A	chr5:150560612-150650001	89.1822
ENSG00000099331	MYO9B	chr19:17186590-17325346	89.0665
ENSG00000111799	COL12A1	chr6:75794041-75915767	89.0605
ENSG00000185787	MORF4L1	chr15:79051544-79190475	89.0558
ENSG00000120742	SERP1	chr3:150259780-150348222	89.0001
ENSG00000255302	EID1	chr15:49115931-49255641	88.9022
ENSG00000173660	UQCRH	chr1:46769302-46782448	88.8369
ENSG00000116171	SCP2	chr1:53392900-53517375	88.7949
ENSG00000214078	CPNE1	chr20:34213952-34288906	88.5906
ENSG00000067182	TNFRSF1A	chr12:6437922-6451280	88.5626
ENSG00000189129	PLAC9	chr10:81891437-81905115	88.5048
ENSG00000105669	COPE	chr19:19010322-19057640	88.4786
ENSG00000108828	VAT1	chr17:41166621-41177140	88.4665
ENSG00000118855	MFSD1	chr3:158414680-158547508	88.1648
ENSG00000232112	TMA7	chr3:48473573-48488060	88.1504
ENSG00000106991	ENG	chr9:130577290-130617035	88.1225
ENSG00000002933	TMEM176A	chr7:150488372-150502208	88.097
ENSG00000106682	EIF4H	chr7:73588574-73611431	88.0266
ENSG00000002834	LASP1	chr17:37026111-37078023	87.9965
ENSG00000170348	TMED10	chr14:75548821-75643334	87.982
ENSG00000182117	NOP10	chr15:34633916-34635378	87.7934
ENSG00000159176	CSRP1	chr1:201452657-201502736	87.7428
ENSG00000175826	CTDNEP1	chr17:7143332-7167302	87.6591
ENSG00000111897	SERINC1	chr6:122764498-122792967	87.6309
ENSG00000100242	SUN2	chr22:39101727-39190203	87.6047
ENSG00000159140	SON	chr21:34876237-35349992	87.5929
ENSG00000087274	ADD1	chr4:2845583-2931803	87.5789
ENSG00000249936	RAC1P2	chr4:46725792-46726625	87.551
ENSG00000100632	ERH	chr14:69846847-69929105	87.5144
ENSG00000177105	RHOG	chr11:3848207-3862213	87.4192
ENSG00000060138	YBX3	chr12:10851682-10875911	87.3836
ENSG00000013364	MVP	chr16:29817426-29859355	87.1946
ENSG00000125835	SNRPB	chr20:2442279-2505348	87.1607
ENSG00000071894	CPSF1	chr8:145596789-145634753	87.1369
ENSG00000175482	POLD4	chr11:67118247-67141648	86.9922
ENSG00000160213	CSTB	chr21:45192392-45196326	86.9758
ENSG00000118705	RPN2	chr20:35729628-35870022	86.9124
ENSG00000168906	MAT2A	chr2:85766287-85788670	86.884
ENSG00000184007	PTP4A2	chr1:32307619-32410457	86.834
ENSG00000198856	OSTC	chr4:109571739-109588976	86.7853
ENSG00000168264	IRF2BP2	chr1:234740014-234745271	86.6898
ENSG00000013441	CLK1	chr2:201717731-201729422	86.6805
ENSG00000198931	APRT	chr16:88875746-88878352	86.6763
ENSG00000163565	IFI16	chr1:158969757-159024945	86.6529
ENSG00000012779	ALOX5	chr10:45869660-45948569	86.6067
ENSG00000177410	ZFAS1	chr20:47835883-47905797	86.5878
ENSG00000105329	TGFB1	chr19:41768400-41930910	86.5372
ENSG00000125347	IRF1	chr5:131817300-131826490	86.5058
ENSG00000140983	RHOT2	chr16:718085-724174	86.442
ENSG00000110958	PTGES3	chr12:57057126-57082159	86.2976
ENSG00000233913	CTC-575D19.1	chr5:168043316-168044059	86.2029
ENSG00000189171	S100A13	chr1:153591262-153618782	86.1507
ENSG00000112514	CUTA	chr6:33378175-33386094	86.1106
ENSG00000125970	RALY	chr20:32570857-32700138	86.0776
ENSG00000065518	NDUFB4	chr3:120315155-120321347	86.0186
ENSG00000100644	HIF1A	chr14:62147758-62263146	85.9957
ENSG00000163513	TGFBR2	chr3:30647993-30735634	85.8196
ENSG00000111786	SRSF9	chr12:120899470-120907596	85.7669
ENSG00000133321	RARRES3	chr11:63304280-63313934	85.6564
ENSG00000184922	FMNL1	chr17:43268297-43394414	85.5749
ENSG00000134590	FAM127A	chrX:134166332-134167576	85.4943
ENSG00000197043	ANXA6	chr5:150480272-150537443	85.3676
ENSG00000107551	RASSF4	chr10:45306471-45491339	85.168
ENSG00000071553	ATP6AP1	chrX:153656977-153664862	85.1028
ENSG00000125995	ROMO1	chr20:34213952-34288906	85.0607
ENSG00000197614	MFAP5	chr12:8786962-8815484	85.0494
ENSG00000110108	TMEM109	chr11:60680637-60720002	85.0133
ENSG00000026297	RNASET2	chr6:166822851-167370679	84.9821
ENSG00000129559	NEDD8	chr14:24641061-24708448	84.9336
ENSG00000063046	EIF4B	chr12:53399941-53458156	84.9328
ENSG00000197629	MPEG1	chr11:58938902-58980424	84.889
ENSG00000069849	ATP1B3	chr3:141594965-141645356	84.8731
ENSG00000128245	YWHAH	chr22:32329506-32353590	84.8283
ENSG00000168209	DDIT4	chr10:74033677-74035794	84.8125
ENSG00000140545	MFGE8	chr15:89441915-89456642	84.6913
ENSG00000177989	ODF3B	chr22:50961996-50971009	84.6255
ENSG00000215021	PHB2	chr12:7072407-7178336	84.5853
ENSG00000156411	C14orf2	chr14:104378624-104394606	84.5765
ENSG00000155463	OXA1L	chr14:23171351-23241007	84.5751
ENSG00000130775	THEMIS2	chr1:28199054-28213196	84.5032
ENSG00000100353	EIF3D	chr22:36906896-36925483	84.3848
ENSG00000152583	SPARCL1	chr4:88394486-88452213	84.3265
ENSG00000114867	EIF4G1	chr3:183851806-184402546	84.3021
ENSG00000147416	ATP6V1B2	chr8:20054877-20084330	84.2878
ENSG00000145649	GZMA	chr5:54398475-54406080	84.2741
ENSG00000183726	TMEM50A	chr1:25568727-25756683	83.9672
ENSG00000170043	TRAPPC1	chr17:7825176-7853236	83.7922
ENSG00000141367	CLTC	chr17:57697218-57919616	83.7351
ENSG00000111144	LTA4H	chr12:96390298-96437298	83.5993
ENSG00000219928	RP11-40C6.2	chr9:90112142-90323548	83.5925
ENSG00000177885	GRB2	chr17:73314156-73401790	83.5871
ENSG00000182809	CRIP2	chr14:105939298-105946499	83.5638
ENSG00000103495	MAZ	chr16:29817426-29859355	83.5313
ENSG00000166136	NDUFB8	chr10:102246398-102319755	83.4442
ENSG00000218283	MORF4L1P1	chr1:220321634-220445796	83.1316
ENSG00000205581	HMGN1	chr21:40714240-40721573	83.0278
ENSG00000250479	CHCHD10	chr22:24105207-24126503	83.0028
ENSG00000089063	TMEM230	chr20:5080485-5093749	82.9737
ENSG00000119335	SET	chr9:131445702-131458679	82.9726
ENSG00000221869	CEBPD	chr8:48649470-48651648	82.8858
ENSG00000148908	RGS10	chr10:121259339-121302220	82.8842
ENSG00000214253	FIS1	chr7:100882738-100895597	82.8163
ENSG00000163902	RPN1	chr3:128338816-128399918	82.7861
ENSG00000214389	RPS3AP26	chr7:97881690-98030380	82.7789
ENSG00000169413	RNASE6	chr14:21249209-21250626	82.7197
ENSG00000142657	PGD	chr1:10458648-10480201	82.7013
ENSG00000141002	TCF25	chr16:89939999-90005169	82.6679
ENSG00000187193	MT1X	chr16:56716335-56721964	82.5722
ENSG00000135916	ITM2C	chr2:231729353-231743963	82.418
ENSG00000180448	HMHA1	chr19:1065921-1095598	82.3431
ENSG00000102007	PLP2	chrX:49028272-49042845	81.8642
ENSG00000130755	GMFG	chr19:39818992-39833012	81.7843
ENSG00000101421	CHMP4B	chr20:32399109-32442172	81.7642
ENSG00000115091	ACTR3	chr2:114647536-114720173	81.7237
ENSG00000166562	SEC11C	chr18:56806708-56826068	81.6687
ENSG00000159388	BTG2	chr1:203274618-203278730	81.3121
ENSG00000196923	PDLIM7	chr5:176910394-176938275	81.2865
ENSG00000143742	SRP9	chr1:225965530-225978168	81.2558
ENSG00000014641	MDH1	chr2:63348517-64054977	81.0261
ENSG00000044574	HSPA5	chr9:127997131-128003609	80.7931
ENSG00000158717	RNF166	chr16:88762902-88772829	80.7714
ENSG00000249353	NPM1P27	chr5:92953774-93447404	80.7449
ENSG00000108465	CDK5RAP3	chr17:46018871-46073562	80.7208
ENSG00000111237	VPS29	chr12:110928901-111021125	80.677
ENSG00000104419	NDRG1	chr8:134249413-134314265	80.6299
ENSG00000182578	CSF1R	chr5:149432853-149492935	80.6251
ENSG00000198744	RP5-857K21.11	chr1:536815-660283	80.5783
ENSG00000272761	RP11-572C15.6	chr3:112315640-112320749	80.3489
ENSG00000135677	GNS	chr12:65107224-65153227	80.3479
ENSG00000115956	PLEK	chr2:68588345-68624585	80.3277
ENSG00000245910	SNHG6	chr8:67782983-67838633	80.2759
ENSG00000138085	ATRAID	chr2:27422454-27440046	80.2214
ENSG00000188612	SUMO2	chr17:73131342-73179078	80.1627
ENSG00000138293	NCOA4	chr10:51565107-51590734	79.9701
ENSG00000253683	CTB-79E8.3	chr5:172068268-172124723	79.8062
ENSG00000170345	FOS	chr14:75745476-75748933	79.7427
ENSG00000125356	NDUFA1	chrX:119004496-119010625	79.6794
ENSG00000213886	UBD	chr6:29523291-29601753	79.6313
ENSG00000147162	OGT	chrX:70752932-70795747	79.594
ENSG00000187498	COL4A1	chr13:110801317-111165374	79.5379
ENSG00000166927	MS4A7	chr11:60102303-60185161	79.4375
ENSG00000107738	C10orf54	chr10:73156690-73575702	79.417
ENSG00000183087	GAS6	chr13:114518602-114567046	79.4149
ENSG00000137573	SULF1	chr8:70378858-70573150	79.3879
ENSG00000123562	MORF4L2	chrX:102930423-102946700	79.375
ENSG00000003056	M6PR	chr12:9066491-9102551	79.2646
ENSG00000144579	CTDSP1	chr2:219262978-219270664	79.2583
ENSG00000165280	VCP	chr9:35056060-35073246	79.2263
ENSG00000168159	RNF187	chr1:228674761-228683467	79.2155
ENSG00000130726	TRIM28	chr19:59055457-59062089	79.1216
ENSG00000162745	OLFML2B	chr1:161952981-161993644	79.0296
ENSG00000252817	AL590431.1	chr1:154179181-154243986	78.7615
ENSG00000188243	COMMD6	chr13:76099349-76123575	78.5573
ENSG00000173442	EHBP1L1	chr11:65343508-65360121	78.4882
ENSG00000175215	CTDSP2	chr12:58213709-58240522	78.4624
ENSG00000112308	C6orf62	chr6:24667262-24721064	78.3452
ENSG00000134954	ETS1	chr11:128328655-128457453	78.2801
ENSG00000113721	PDGFRB	chr5:149493399-149535435	78.2589
ENSG00000043462	LCP2	chr5:169659450-169725231	78.2396
ENSG00000122034	GTF3A	chr13:27998680-28024739	78.1917
ENSG00000196562	SULF2	chr20:46130600-46415360	78.0938
ENSG00000175334	BANF1	chr11:65764015-65771620	78.0581
ENSG00000157916	RER1	chr1:2323266-2345236	78.0181
ENSG00000115307	AUP1	chr2:74753771-74784681	77.9964
ENSG00000136888	ATP6V1G1	chr9:117350025-117360653	77.9311
ENSG00000138674	SEC31A	chr4:83739813-83934079	77.7426
ENSG00000178695	KCTD12	chr13:77454311-77460540	77.732
ENSG00000089248	ERP29	chr12:112451119-112461255	77.6243
ENSG00000079805	DNM2	chr19:10828754-10946994	77.5699
ENSG00000135441	BLOC1S1	chr12:56075329-56118489	77.5218
ENSG00000224550	RP11-270C12.3	chr1:108047824-108048070	77.392
ENSG00000041357	PSMA4	chr15:78832746-78841604	77.0986
ENSG00000220842	RP11-572P18.1	chr10:122114176-122114718	76.9487
ENSG00000145730	PAM	chr5:102089684-102366809	76.897
ENSG00000152558	TMEM123	chr11:102267062-102369532	76.8262
ENSG00000110696	C11orf58	chr11:15987994-16778428	76.7676
ENSG00000143612	C1orf43	chr1:154179181-154243986	76.7508
ENSG00000170906	NDUFA3	chr19:54606035-54635140	76.7504
ENSG00000177556	ATOX1	chr5:151121876-151192346	76.7186
ENSG00000153187	HNRNPU	chr1:244998623-245027844	76.585
ENSG00000175550	DRAP1	chr11:65686727-65689032	76.5288
ENSG00000088247	KHSRP	chr19:6413358-6424805	76.5017
ENSG00000137509	PRCP	chr11:82534543-82782965	76.4231
ENSG00000159692	CTBP1	chr4:1205235-1282079	76.2806
ENSG00000118785	SPP1	chr4:88896818-88904562	76.2452
ENSG00000106483	SFRP4	chr7:37723398-38065297	75.9949
ENSG00000100813	ACIN1	chr14:23527772-23569665	75.7877
ENSG00000177733	HNRNPA0	chr5:137087074-137090039	75.7822
ENSG00000022267	FHL1	chrX:135229558-135293518	75.7305
ENSG00000171867	PRNP	chr20:4666881-4682236	75.6934
ENSG00000142168	SOD1	chr21:33031934-33041244	75.6561
ENSG00000140931	CMTM3	chr16:66637776-66647795	75.6385
ENSG00000272888	AC013394.2	chr15:93425936-93571237	75.6051
ENSG00000141524	TMC6	chr17:76000248-76139049	75.5228
ENSG00000132514	CLEC10A	chr17:6977855-6983626	75.3403
ENSG00000269893	SNHG8	chr4:119199863-119200978	75.2877
ENSG00000258315	C17orf49	chr17:6757179-6922978	75.2651
ENSG00000077454	LRCH4	chr7:100169854-100205798	75.1706
ENSG00000100364	KIAA0930	chr22:45586218-45636650	75.1552
ENSG00000006074	CCL18	chr17:34391639-34399392	75.1328
ENSG00000162645	GBP2	chr1:89571814-89641723	75.0463
ENSG00000185236	RAB11B	chr19:8428172-8469318	74.9409
ENSG00000158714	SLAMF8	chr1:159796539-159869953	74.8725
ENSG00000100836	PABPN1	chr14:23654524-23795394	74.8589
ENSG00000177700	POLR2L	chr11:818901-842545	74.8091
ENSG00000136450	SRSF1	chr17:56066398-56084707	74.7989
ENSG00000087302	C14orf166	chr14:52456192-52471420	74.746
ENSG00000078304	PPP2R5C	chr14:102228134-102394326	74.6127
ENSG00000105402	NAPA	chr19:47987538-48018497	74.5635
ENSG00000204252	HLA-DOA	chr6:32971954-32977389	74.5129
ENSG00000106066	CPVL	chr7:29019582-29603286	74.2797
ENSG00000091527	CDV3	chr3:133292573-133309105	74.2644
ENSG00000122786	CALD1	chr7:134429002-134655479	74.2599
ENSG00000090006	LTBP4	chr19:41098788-41135725	74.2101
ENSG00000034713	GABARAPL2	chr16:75562429-75657198	74.1669
ENSG00000086062	B4GALT1	chr9:33104079-33179981	74.126
ENSG00000166888	STAT6	chr12:57482676-57607134	74.0797
ENSG00000198851	CD3E	chr11:118175259-118186890	74.0363
ENSG00000211450	C11orf31	chr11:57480071-57587018	74.0171
ENSG00000126246	IGFLR1	chr19:36230057-36245420	73.8056
ENSG00000159128	IFNGR2	chr21:34775201-34852318	73.8003
ENSG00000149357	LAMTOR1	chr11:71709586-71823826	73.7198
ENSG00000181029	TRAPPC5	chr19:7741513-7747744	73.6376
ENSG00000112081	SRSF3	chr6:36562144-36573377	73.6351
ENSG00000117616	C1orf63	chr1:25568727-25756683	73.5998
ENSG00000100079	LGALS2	chr22:37966254-37978623	73.5578
ENSG00000125971	DYNLRB1	chr20:33104213-33128762	73.4806
ENSG00000160888	IER2	chr19:13261228-13265722	73.4586
ENSG00000170955	PRKCDBP	chr11:6340175-6341877	73.41
ENSG00000153310	FAM49B	chr8:130844546-131029375	73.3438
ENSG00000142507	PSMB6	chr17:4699438-4701790	73.3266
ENSG00000126756	UXT	chrX:47511196-47519776	73.2165
ENSG00000089597	GANAB	chr11:62392297-62414104	73.1506
ENSG00000117592	PRDX6	chr1:173446404-173457946	73.0162
ENSG00000260032	LINC00657	chr20:34633543-34638882	72.9872
ENSG00000105323	HNRNPUL1	chr19:41768400-41930910	72.9727
ENSG00000168056	LTBP3	chr11:65306275-65326401	72.9628
ENSG00000106819	ASPN	chr9:95059639-95432547	72.8971
ENSG00000169230	PRELID1	chr5:176728198-176739758	72.885
ENSG00000152601	MBNL1	chr3:151961616-152214602	72.8568
ENSG00000003756	RBM5	chr3:49977439-50226508	72.8543
ENSG00000010810	FYN	chr6:111981534-112194655	72.8037
ENSG00000165678	GHITM	chr10:85898175-85913001	72.7335
ENSG00000168894	RNF181	chr2:85822847-85824736	72.6896
ENSG00000269378	ITGB1P1	chr19:14729928-14889353	72.683
ENSG00000100823	APEX1	chr14:20923349-20929771	72.6216
ENSG00000235043	TECRP1	chr4:87797357-88062206	72.4657
ENSG00000087088	BAX	chr19:49458071-49465055	72.4467
ENSG00000140391	TSPAN3	chr15:77336021-77376326	72.431
ENSG00000105202	FBL	chr19:40325097-40337054	72.3847
ENSG00000087116	ADAMTS2	chr5:178537851-178772431	72.3579
ENSG00000172236	TPSAB1	chr16:1290696-1292555	72.3276
ENSG00000165527	ARF6	chr14:50359809-50361490	72.1153
ENSG00000160948	VPS28	chr8:145648999-145653931	72.0713
ENSG00000182179	UBA7	chr3:49842639-49851379	71.8141
ENSG00000174903	RAB1B	chr11:66036003-66056641	71.7793
ENSG00000169813	HNRNPF	chr10:43881064-43904614	71.7259
ENSG00000171298	GAA	chr17:78075354-78093678	71.6929
ENSG00000186298	PPP1CC	chr12:111157484-111180744	71.6191
ENSG00000186340	THBS2	chr6:169613348-169654139	71.5262
ENSG00000089693	MLF2	chr12:6857169-6880116	71.4862
ENSG00000115738	ID2	chr2:8806765-8824583	71.398
ENSG00000170248	PDCD6IP	chr3:33839843-33911194	71.3932
ENSG00000176046	NUPR1	chr16:28548605-28550495	71.3882
ENSG00000140990	NDUFB10	chr16:2009508-2011976	71.3787
ENSG00000185862	EVI2B	chr17:29335514-29709134	71.3769
ENSG00000213494	CCL14	chr17:34310326-34338658	71.3034
ENSG00000108691	CCL2	chr17:32581899-32584222	71.2599
ENSG00000135926	TMBIM1	chr2:219135114-219232822	71.2198
ENSG00000132471	WBP2	chr17:73841779-73852588	71.1766
ENSG00000116774	OLFML3	chr1:114522062-114524876	71.1763
ENSG00000141756	FKBP10	chr17:39968931-39979465	71.1728
ENSG00000137497	NUMA1	chr11:71709586-71823826	71.1319
ENSG00000100902	PSMA6	chr14:35514112-35786699	71.1125
ENSG00000140740	UQCRC2	chr16:21963980-21994981	71.0327
ENSG00000099783	HNRNPM	chr19:8509650-8553998	70.9214
ENSG00000170540	ARL6IP1	chr16:18792616-18813000	70.8648
ENSG00000167671	UBXN6	chr19:4402658-4457819	70.8434
ENSG00000196954	CASP4	chr11:104813592-104840163	70.8328
ENSG00000211685	IGLC7	chr22:23264765-23265203	70.7575
ENSG00000175602	CCDC85B	chr11:65657874-65659105	70.6543
ENSG00000108669	CYTH1	chr17:76670129-76778379	70.6493
ENSG00000198355	PIM3	chr22:50354160-50357728	70.6385
ENSG00000116489	CAPZA1	chr1:113009162-113214241	70.6254
ENSG00000176014	TUBB6	chr18:12307667-12377313	70.6032
ENSG00000125753	VASP	chr19:46009836-46030241	70.5329
ENSG00000148671	ADIRF	chr10:88695296-88784489	70.5221
ENSG00000130309	COLGALT1	chr19:17666402-17693971	70.5033
ENSG00000143110	C1orf162	chr1:112016413-112021134	70.4906
ENSG00000159720	ATP6V0D1	chr16:67471916-67515140	70.4126
ENSG00000143321	HDGF	chr1:156711898-156770607	70.3907
ENSG00000172428	MYEOV2	chr2:241065979-241076224	70.3085
ENSG00000107372	ZFAND5	chr9:74966340-74980163	70.1045
ENSG00000105887	MTPN	chr7:135611202-135662101	70.0249
ENSG00000103855	CD276	chr15:73976306-74006859	70.0215
ENSG00000140678	ITGAX	chr16:31366454-31394318	69.988
ENSG00000103653	CSK	chr15:75074397-75095539	69.9555
ENSG00000184900	SUMO3	chr21:46225531-46238694	69.945
ENSG00000130313	PGLS	chr19:17579577-17632097	69.9386
ENSG00000179820	MYADM	chr19:54357834-54379691	69.8696
ENSG00000125503	PPP1R12C	chr19:55602280-55628927	69.858
ENSG00000141526	SLC16A3	chr17:80186272-80231607	69.7377
ENSG00000105568	PPP2R1A	chr19:52693291-52734547	69.6943
ENSG00000129103	SUMF2	chr7:56131694-56148363	69.6672
ENSG00000226564	FTH1P20	chr2:181737593-181738141	69.6129
ENSG00000225131	PSME2P2	chr13:49345263-49345965	69.5604
ENSG00000085117	CD82	chr11:44585976-44641913	69.4031
ENSG00000167815	PRDX2	chr19:12873816-12985765	69.3989
ENSG00000151726	ACSL1	chr4:185676748-185747972	69.292
ENSG00000196419	XRCC6	chr22:42017122-42060044	69.2913
ENSG00000237541	HLA-DQA2	chr6:32709118-32714992	69.2783
ENSG00000196611	MMP1	chr11:102617698-102714534	69.2709
ENSG00000099341	PSMD8	chr19:38865175-38874464	69.2571
ENSG00000127540	UQCR11	chr19:1576638-1605480	69.074
ENSG00000111328	CDK2AP1	chr12:123636866-123756881	69.028
ENSG00000136295	TTYH3	chr7:2671584-2704436	69.0071
ENSG00000137076	TLN1	chr9:35696944-35758572	68.9741
ENSG00000026950	BTN3A1	chr6:26402464-26415444	68.9528
ENSG00000115875	SRSF7	chr2:38970740-38978636	68.9471
ENSG00000134107	BHLHE40	chr3:4938492-5027008	68.9259
ENSG00000103145	HCFC1R1	chr16:3072620-3089134	68.8942
ENSG00000159069	FBXW5	chr9:139834886-139839148	68.8761
ENSG00000124193	SRSF6	chr20:42086567-42092245	68.8553
ENSG00000071967	CYBRD1	chr2:172378756-172414643	68.8055
ENSG00000143226	FCGR2A	chr1:161475219-161648444	68.7562
ENSG00000175166	PSMD2	chr3:183851806-184402546	68.6774
ENSG00000041982	TNC	chr9:117782805-117880536	68.6459
ENSG00000117335	CD46	chr1:207925401-207968858	68.6204
ENSG00000140968	IRF8	chr16:85932408-85956215	68.5892
ENSG00000224864	CTC-260E6.2	chr19:20188802-20432114	68.4921
ENSG00000168488	ATXN2L	chr16:28834355-28848558	68.3464
ENSG00000105220	GPI	chr19:34850384-34919178	68.3103
ENSG00000168036	CTNNB1	chr3:41236327-42003922	68.2051
ENSG00000118515	SGK1	chr6:134490383-134639250	68.2003
ENSG00000175130	MARCKSL1	chr1:32799432-32801980	68.1958
ENSG00000044115	CTNNA1	chr5:137946655-138270723	68.1016
ENSG00000217555	CKLF	chr16:66586465-66613040	67.8239
ENSG00000025434	NR1H3	chr11:47260852-47290396	67.8184
ENSG00000168003	SLC3A2	chr11:62623517-62656352	67.7904
ENSG00000185088	RPS27L	chr15:63413998-63450220	67.6878
ENSG00000071626	DAZAP1	chr19:1407567-1435719	67.6753
ENSG00000198408	MGEA5	chr10:103544199-103578696	67.6475
ENSG00000174059	CD34	chr1:208057593-208084747	67.6353
ENSG00000026751	SLAMF7	chr1:160709036-160724611	67.613
ENSG00000140853	NLRC5	chr16:57023396-57117443	67.5874
ENSG00000136938	ANP32B	chr9:100745642-100778225	67.4289
ENSG00000213654	GPSM3	chr6:32158542-32191844	67.4265
ENSG00000163931	TKT	chr3:53258722-53290068	67.4231
ENSG00000101347	SAMHD1	chr20:35504523-35580246	67.3422
ENSG00000074842	C19orf10	chr19:4639529-4670382	67.2834
ENSG00000241081	RP11-488C13.1	chr14:77352719-77353093	67.2204
ENSG00000100292	HMOX1	chr22:35776353-35790207	67.2124
ENSG00000165457	FOLR2	chr11:71927644-71932994	67.2036
ENSG00000141551	CSNK1D	chr17:80186272-80231607	67.1962
ENSG00000167613	LAIR1	chr19:54865361-54882165	67.1913
ENSG00000164096	C4orf3	chr4:120218206-120225600	67.1702
ENSG00000198467	TPM2	chr9:35681988-35691017	67.1505
ENSG00000184584	TMEM173	chr5:138855118-138862520	67.1035
ENSG00000178952	TUFM	chr16:28853731-28857729	67.0754
ENSG00000111843	TMEM14C	chr6:10723147-10731362	67.0727
ENSG00000256745	RP11-680H20.1	chr11:93921614-93922163	66.9626
ENSG00000129351	ILF3	chr19:10764936-10803093	66.9
ENSG00000137312	FLOT1	chr6:30695485-30710510	66.8326
ENSG00000027697	IFNGR1	chr6:137518620-137540586	66.7369
ENSG00000251562	MALAT1	chr11:65265232-65273940	66.713
ENSG00000079246	XRCC5	chr2:216972186-217071026	66.7076
ENSG00000105254	TBCB	chr19:36602103-36616849	66.609
ENSG00000150459	SAP18	chr13:21714652-21723221	66.6003
ENSG00000134851	TMEM165	chr4:56262123-56414056	66.5537
ENSG00000197102	DYNC1H1	chr14:102430864-102532565	66.5247
ENSG00000165672	PRDX3	chr10:120927214-120938345	66.4913
ENSG00000136527	TRA2B	chr3:185633693-185655924	66.3453
ENSG00000186847	KRT14	chr17:39738530-39743173	66.3451
ENSG00000133835	HSD17B4	chr5:118788137-118972894	66.3293
ENSG00000103490	PYCARD	chr16:31212805-31214773	66.3288
ENSG00000166278	C2	chr6:31865561-31919861	66.3238
ENSG00000186635	ARAP1	chr11:72396113-72504726	66.3223
ENSG00000133466	C1QTNF6	chr22:37521877-37595425	66.2894
ENSG00000143320	CRABP2	chr1:156669397-156675608	66.2409
ENSG00000117519	CNN3	chr1:95362506-95392834	66.1773
ENSG00000137767	SQRDL	chr15:45879320-45983492	66.1657
ENSG00000074370	ATP2A3	chr17:3827168-3867736	66.0614
ENSG00000132424	PNISR	chr6:99845926-99879249	66.033
ENSG00000197622	CDC42SE1	chr1:151020215-151042801	66.0224
ENSG00000133313	CNDP2	chr18:72163050-72188366	66.0171
ENSG00000175463	TBC1D10C	chr11:67159175-67193078	66.0158
ENSG00000255594	Z82188.1	chr22:37621300-37640488	65.9346
ENSG00000169223	LMAN2	chr5:176758562-176778853	65.8153
ENSG00000015479	MATR3	chr5:138282408-138667360	65.6539
ENSG00000185187	SIGIRR	chr11:405715-417455	65.648
ENSG00000233328	PFN1P1	chr1:171639656-171640079	65.6377
ENSG00000099817	POLR2E	chr19:1065921-1095598	65.6326
ENSG00000100288	CHKB	chr22:51007289-51052409	65.5741
ENSG00000167553	TUBA1C	chr12:49578578-49667114	65.5598
ENSG00000084623	EIF3I	chr1:32674694-32697205	65.5555
ENSG00000134285	FKBP11	chr12:49297200-49351334	65.4931
ENSG00000069399	BCL3	chr19:45250961-45263301	65.4697
ENSG00000147274	RBMX	chrX:135923089-135962923	65.4266
ENSG00000090487	SPG21	chr15:65255361-65282648	65.4132
ENSG00000136732	GYPC	chr2:127413508-127454246	65.3963
ENSG00000085265	FCN1	chr9:137801430-137809809	65.362
ENSG00000171530	TBCA	chr5:76986990-77164604	65.3047
ENSG00000197451	HNRNPAB	chr5:177631507-177659792	65.2978
ENSG00000134248	LAMTOR5	chr1:110905469-110974982	65.2216
ENSG00000124155	PIGT	chr20:44044716-44054884	65.219
ENSG00000119729	RHOQ	chr2:46717888-46852881	65.2162
ENSG00000169504	CLIC4	chr1:25071847-25170815	65.1079
ENSG00000123689	G0S2	chr1:209834708-209908295	65.0226
ENSG00000005893	LAMP2	chrX:119561681-119603220	64.9514
ENSG00000203879	GDI1	chrX:153665265-153671814	64.9182
ENSG00000130724	CHMP2A	chr19:59062932-59066491	64.8589
ENSG00000087365	SF3B2	chr11:65818199-65837090	64.642
ENSG00000105968	H2AFV	chr7:44866389-44887682	64.6168
ENSG00000162191	UBXN1	chr11:62443969-62446567	64.5288
ENSG00000112576	CCND3	chr6:41902670-42018095	64.4467
ENSG00000244687	UBE2V1	chr20:48697660-48770335	64.4044
ENSG00000243199	RP11-408P14.1	chr4:66185280-66563747	64.3699
ENSG00000167895	TMC8	chr17:76000248-76139049	64.2642
ENSG00000243264	IGKV2D-29	chr2:89986321-89987079	64.2214
ENSG00000174348	PODN	chr1:53527853-53551174	64.1935
ENSG00000152291	TGOLN2	chr2:85545146-85555548	64.1927
ENSG00000107438	PDLIM1	chr10:96997328-97050781	64.1158
ENSG00000146701	MDH2	chr7:75677368-75696826	64.1011
ENSG00000129038	LOXL1	chr15:74200423-74244478	64.096
ENSG00000148362	C9orf142	chr9:139886869-139888436	64.0356
ENSG00000174231	PRPF8	chr17:1553922-1588176	63.9211
ENSG00000093010	COMT	chr22:19863039-20004331	63.9158
ENSG00000198406	BZW1P2	chr3:115521234-117716439	63.876
ENSG00000143420	ENSA	chr1:150573326-150602088	63.8243
ENSG00000160410	SHKBP1	chr19:41082756-41097305	63.7581
ENSG00000122694	GLIPR2	chr9:36136731-36163910	63.6976
ENSG00000125520	SLC2A4RG	chr20:62289162-62374858	63.6821
ENSG00000115694	STK25	chr2:242295657-242449145	63.5724
ENSG00000006015	C19orf60	chr19:18682539-18731849	63.4739
ENSG00000089053	ANAPC5	chr12:121746047-121837699	63.445
ENSG00000116649	SRM	chr1:11114640-11120081	63.4435
ENSG00000049656	CLPTM1L	chr5:1317858-1345214	63.3593
ENSG00000088448	ANKRD10	chr13:111530886-111567416	63.3532
ENSG00000010244	ZNF207	chr17:30593194-30708905	63.3478
ENSG00000121774	KHDRBS1	chr1:32479429-32568467	63.3442
ENSG00000103769	RAB11A	chr15:65903703-66184329	63.2167
ENSG00000038945	MSR1	chr8:15965386-16424999	63.1608
ENSG00000128284	APOL3	chr22:36536371-36562225	63.0961
ENSG00000162909	CAPN2	chr1:223889294-223963720	63.0239
ENSG00000177674	AGTRAP	chr1:11796140-11814859	63.0064
ENSG00000075618	FSCN1	chr7:5632438-5646286	62.9699
ENSG00000091136	LAMB1	chr7:107531414-107643700	62.9585
ENSG00000168461	RAB31	chr18:9708161-9862548	62.8406
ENSG00000239819	IGKV1D-8	chr2:90259592-90260248	62.8369
ENSG00000197858	GPAA1	chr8:145137492-145141119	62.7958
ENSG00000124762	CDKN1A	chr6:36644304-36655116	62.7929
ENSG00000162231	NXF1	chr11:62559594-62573774	62.7473
ENSG00000119185	ITGB1BP1	chr2:9346893-9563676	62.7333
ENSG00000103335	PIEZO1	chr16:88772870-88851619	62.7178
ENSG00000225217	HSPA7	chr1:161475219-161648444	62.6
ENSG00000114850	SSR3	chr3:156257928-156272973	62.5886
ENSG00000254395	IGHV4-55	chr14:107062110-107062561	62.5541
ENSG00000185627	PSMD13	chr11:215457-252983	62.4943
ENSG00000197253	TPSB2	chr16:1277271-1280214	62.4698
ENSG00000054148	PHPT1	chr9:139743175-139755249	62.4361
ENSG00000096060	FKBP5	chr6:35541361-35696360	62.3826
ENSG00000188643	S100A16	chr1:153579361-153585621	62.3762
ENSG00000204370	SDHD	chr11:111895537-112095422	62.3328
ENSG00000247596	TWF2	chr3:52255095-52275113	62.3012
ENSG00000120948	TARDBP	chr1:11072413-11085796	62.2346
ENSG00000164104	HMGB2	chr4:174252845-174256276	62.2345
ENSG00000130489	SCO2	chr22:50961996-50971009	62.2019
ENSG00000120896	SORBS3	chr8:22298331-22433301	62.1914
ENSG00000155465	SLC7A7	chr14:23242430-23299029	62.1844
ENSG00000136521	NDUFB5	chr3:179322477-179345435	62.1667
ENSG00000127483	HP1BP3	chr1:21069153-21113816	62.1652
ENSG00000182934	SRPR	chr11:126071992-126148026	62.1431
ENSG00000063244	U2AF2	chr19:56165511-56186081	62.0899
ENSG00000136279	DBNL	chr7:44084238-44109055	61.9854
ENSG00000233270	SNRPEP4	chr19:5576670-5576949	61.9253
ENSG00000137491	SLCO2B1	chr11:74810216-74917594	61.8988
ENSG00000163162	RNF149	chr2:101887680-101925163	61.8682
ENSG00000115380	EFEMP1	chr2:56093101-56151274	61.8615
ENSG00000137309	HMGA1	chr6:34204649-34214008	61.8043
ENSG00000090339	ICAM1	chr19:10362576-10399695	61.7115
ENSG00000140497	SCAMP2	chr15:75136070-75165706	61.6747
ENSG00000067113	PPAP2A	chr5:54603587-54830878	61.5935
ENSG00000076944	STXBP2	chr19:7694622-7712759	61.5618
ENSG00000175756	AURKAIP1	chr1:1309109-1310875	61.3918
ENSG00000143369	ECM1	chr1:150480537-150486265	61.2809
ENSG00000142327	RNPEPL1	chr2:241418838-241520789	61.2626
ENSG00000123146	CD97	chr19:14491312-14519537	61.2597
ENSG00000109180	OCIAD1	chr4:48807228-48863834	61.2384
ENSG00000213088	DARC	chr1:159141398-159177763	61.2094
ENSG00000122515	ZMIZ2	chr7:44788179-44809477	61.1901
ENSG00000180817	PPA1	chr10:71962585-71993667	61.1552
ENSG00000170142	UBE2E1	chr3:23845514-23932807	61.1442
ENSG00000101558	VAPA	chr18:9913998-9960018	61.1312
ENSG00000086300	SNX10	chr7:26331540-26416321	61.0984
ENSG00000067066	SP100	chr2:231280656-231444721	61.0957
ENSG00000161642	ZNF385A	chr12:54747444-54891472	61.0824
ENSG00000103275	UBE2I	chr16:1355547-1377019	61.0317
ENSG00000169926	KLF13	chr15:31619057-31727868	60.9939
ENSG00000028137	TNFRSF1B	chr1:12227059-12269285	60.9851
ENSG00000211950	IGHV1-24	chr14:106733143-106733639	60.983
ENSG00000010256	UQCRC1	chr3:48636434-48648409	60.9551
ENSG00000049245	VAMP3	chr1:7831328-7841492	60.9494
ENSG00000173762	CD7	chr17:80272743-80275478	60.9346
ENSG00000227063	RPL41P1	chr20:21735865-21736171	60.8527
ENSG00000116871	MAP7D1	chr1:36621179-36646450	60.8107
ENSG00000167123	CERCAM	chr9:131174029-131199626	60.7484
ENSG00000115944	COX7A2L	chr2:42560685-42652228	60.7352
ENSG00000121858	TNFSF10	chr3:172223297-172241297	60.7121
ENSG00000214022	REPIN1	chr7:150060865-150109558	60.6516
ENSG00000125304	TM9SF2	chr13:100153670-100216260	60.6499
ENSG00000109390	NDUFC1	chr4:140187316-140397763	60.6088
ENSG00000100453	GZMB	chr14:25064928-25126980	60.5926
ENSG00000188229	TUBB4B	chr9:140135664-140142222	60.5438
ENSG00000143537	ADAM15	chr1:155006299-155035252	60.5246
ENSG00000126934	MAP2K2	chr19:4090318-4124126	60.4838
ENSG00000213585	VDAC1	chr5:133307605-133340824	60.3143
ENSG00000172638	EFEMP2	chr11:65590492-65641063	60.2722
ENSG00000153113	CAST	chr5:95220801-96143803	60.2508
ENSG00000012660	ELOVL5	chr6:53132195-53213947	60.2279
ENSG00000130300	PLVAP	chr19:17462256-17488159	60.2188
ENSG00000080822	CLDND1	chr3:98216447-98312567	60.2017
ENSG00000134294	SLC38A2	chr12:46751971-46767561	60.1617
ENSG00000147443	DOK2	chr8:21766383-21771371	60.16
ENSG00000163660	CCNL1	chr3:156864296-156878549	60.1123
ENSG00000196329	GIMAP5	chr7:150413644-150487837	60.0772
ENSG00000160593	AMICA1	chr11:118064454-118095809	60.0384
ENSG00000146425	DYNLT1	chr6:159057505-159065771	59.9761
ENSG00000014216	CAPN1	chr11:64945076-64979477	59.9612
ENSG00000101084	C20orf24	chr20:34894257-35274619	59.8176
ENSG00000166825	ANPEP	chr15:90328119-90358633	59.7552
ENSG00000254893	RP11-466P24.2	chr5:75377770-75649764	59.7436
ENSG00000104979	C19orf53	chr19:13875345-13889276	59.6691
ENSG00000127603	MACF1	chr1:39546987-39952849	59.5398
ENSG00000114978	MOB1A	chr2:74379654-74406025	59.4789
ENSG00000101361	NOP56	chr20:2632790-2639039	59.466
ENSG00000067082	KLF6	chr10:3818187-3827473	59.4396
ENSG00000128699	ORMDL1	chr2:190635048-190649097	59.4207
ENSG00000038274	MAT2B	chr5:162930119-162946342	59.4092
ENSG00000184232	OAF	chr11:120081474-120101041	59.2978
ENSG00000000938	FGR	chr1:27938574-27961788	59.2516
ENSG00000142208	AKT1	chr14:105235685-105262088	59.249
ENSG00000124491	F13A1	chr6:6144317-6321246	59.2401
ENSG00000169180	XPO6	chr16:28109299-28223241	59.195
ENSG00000213445	SIPA1	chr11:65405567-65418401	59.1858
ENSG00000213619	NDUFS3	chr11:47487495-47606114	59.1141
ENSG00000161091	MFSD12	chr19:3506270-3579086	59.0541
ENSG00000119048	UBE2B	chr5:133706869-133727683	59.0191
ENSG00000166333	ILK	chr11:6624871-6633898	58.9476
ENSG00000242485	MRPL20	chr1:1334901-1342693	58.9343
ENSG00000136930	PSMB7	chr9:127115744-127177723	58.8751
ENSG00000120438	TCP1	chr6:160090088-160210781	58.8616
ENSG00000169439	SDC2	chr8:97505578-97624000	58.8485
ENSG00000218227	RP11-889L3.1	chr5:177482604-177483195	58.8121
ENSG00000226976	COX6A1P2	chr6:37012606-37013177	58.6811
ENSG00000128951	DUT	chr15:48604549-48635570	58.6702
ENSG00000213058	RP4-765C7.2	chr1:178060642-178448644	58.6345
ENSG00000143418	CERS2	chr1:150898738-150948010	58.5963
ENSG00000237350	CDC42P6	chr4:22694536-22821198	58.4838
ENSG00000113088	GZMK	chr5:54273691-54338672	58.4012
ENSG00000169718	DUS1L	chr17:80015381-80023763	58.3674
ENSG00000120727	PAIP2	chr5:138677275-138720242	58.2884
ENSG00000100258	LMF2	chr22:50941375-50946135	58.2514
ENSG00000142347	MYO1F	chr19:8585673-8642461	58.2246
ENSG00000184752	NDUFA12	chr12:95290830-95397546	58.204
ENSG00000101150	TPD52L2	chr20:62496595-62522898	58.2018
ENSG00000165458	INPPL1	chr11:71934744-71956708	58.1865
ENSG00000175220	ARHGAP1	chr11:46698629-46722165	58.1768
ENSG00000145337	PYURF	chr4:89442135-89629693	58.1652
ENSG00000115204	MPV17	chr2:27532359-27548547	58.1317
ENSG00000102804	TSC22D1	chr13:45007654-45151283	58.1291
ENSG00000160691	SHC1	chr1:154929501-154946871	58.1187
ENSG00000172725	CORO1B	chr11:67202980-67211292	58.1171
ENSG00000143013	LMO4	chr1:87794150-87814606	58.0977
ENSG00000109736	MFSD10	chr4:2932287-2936586	58.0607
ENSG00000013306	SLC25A39	chr17:42396992-42402238	58.0573
ENSG00000149823	VPS51	chr11:64851694-64883856	58.0494
ENSG00000172243	CLEC7A	chr12:10269375-10282857	58.0153
ENSG00000162368	CMPK1	chr1:47799468-47844511	57.9955
ENSG00000137841	PLCB2	chr15:40570376-40600136	57.9101
ENSG00000003402	CFLAR	chr2:201980826-202041410	57.91
ENSG00000198898	CAPZA2	chr7:116451123-116562103	57.8991
ENSG00000133318	RTN3	chr11:63448917-63527363	57.8628
ENSG00000108424	KPNB1	chr17:45726841-45762871	57.8503
ENSG00000104518	GSDMD	chr8:144635376-144645232	57.6649
ENSG00000124570	SERPINB6	chr6:2948392-2972090	57.6364
ENSG00000153071	DAB2	chr5:39284363-39462402	57.539
ENSG00000116701	NCF2	chr1:183441350-183567381	57.5266
ENSG00000161671	EMC10	chr19:50970041-50986608	57.5166
ENSG00000089159	PXN	chr12:120639093-120703574	57.4789
ENSG00000100567	PSMA3	chr14:58466452-58764857	57.4495
ENSG00000138964	PARVG	chr22:44568835-44615413	57.4281
ENSG00000168685	IL7R	chr5:35852796-35879705	57.399
ENSG00000133574	GIMAP4	chr7:150264364-150271041	57.3863
ENSG00000110057	UNC93B1	chr11:67758574-67772452	57.3492
ENSG00000160710	ADAR	chr1:154554537-154600475	57.256
ENSG00000160271	RALGDS	chr9:135973106-136039332	57.2421
ENSG00000149115	TNKS1BP1	chr11:57067111-57092426	57.1642
ENSG00000111481	COPZ1	chr12:54624723-54745633	57.1199
ENSG00000021355	SERPINB1	chr6:2832565-2842240	57.096
ENSG00000069424	KCNAB2	chr1:5922870-6161253	57.0235
ENSG00000081154	PCNP	chr3:101292938-101313281	57.0208
ENSG00000116473	RAP1A	chr1:112025969-112310638	57.0027
ENSG00000164346	NSA2	chr5:73923233-74072737	56.9602
ENSG00000152661	GJA1	chr6:121756837-121770873	56.8845
ENSG00000103496	STX4	chr16:31044209-31054296	56.8264
ENSG00000131871	VIMP	chr15:101811021-101817705	56.7932
ENSG00000215492	HNRNPA1P7	chr18:29598334-30050447	56.6941
ENSG00000223953	C1QTNF5	chr11:119209651-119217383	56.6272
ENSG00000196776	CD47	chr3:107762144-107809872	56.6266
ENSG00000225663	FAM195B	chr17:79780286-79791178	56.6083
ENSG00000022840	RNF10	chr12:120941076-121015397	56.6072
ENSG00000115234	SNX17	chr2:27593388-27599995	56.604
ENSG00000188042	ARL4C	chr2:235401684-235405697	56.5908
ENSG00000220205	VAMP2	chr17:8043789-8066864	56.5696
ENSG00000131504	DIAPH1	chr5:140894582-141016437	56.5369
ENSG00000157020	SEC13	chr3:10289706-10362862	56.4494
ENSG00000123329	ARHGAP9	chr12:57853917-57914300	56.2027
ENSG00000181789	COPG1	chr3:128968448-128996614	56.1524
ENSG00000124783	SSR1	chr6:7268538-7418270	56.1506
ENSG00000103249	CLCN7	chr16:1494934-1525581	56.1471
ENSG00000128463	EMC4	chr15:34517199-34522357	56.0886
ENSG00000232629	HLA-DQB2	chr6:32723874-32731311	56.066
ENSG00000142864	SERBP1	chr1:67873492-67896098	56.0346
ENSG00000127922	SHFM1	chr7:96110937-96339203	56.0208
ENSG00000004776	HSPB6	chr19:36245466-36248980	56.0121
ENSG00000146674	IGFBP3	chr7:45951948-45961473	55.9828
ENSG00000106028	SSBP1	chr7:141404137-141488440	55.9668
ENSG00000135624	CCT7	chr2:73460547-73480149	55.9072
ENSG00000159210	SNF8	chr17:47006677-47022479	55.8878
ENSG00000162407	PPAP2B	chr1:56960418-57110974	55.8542
ENSG00000099875	MKNK2	chr19:2037469-2051243	55.7864
ENSG00000179144	GIMAP7	chr7:150211917-150218161	55.7711
ENSG00000141959	PFKL	chr21:45719933-45747259	55.7291
ENSG00000180581	SRP9P1	chr10:93558068-93625033	55.717
ENSG00000129968	ABHD17A	chr19:1876808-1885546	55.6712
ENSG00000100664	EIF5	chr14:103799880-103811362	55.6428
ENSG00000179632	MAF1	chr8:145153535-145173218	55.6374
ENSG00000101220	C20orf27	chr20:3734154-3749034	55.6315
ENSG00000128789	PSMG2	chr18:12438888-12725739	55.6127
ENSG00000198858	R3HDM4	chr19:896502-913240	55.5883
ENSG00000167543	TP53I13	chr17:27887564-28513493	55.5588
ENSG00000133275	CSNK1G2	chr19:1941187-1981337	55.5221
ENSG00000077782	FGFR1	chr8:38268655-38326352	55.5208
ENSG00000176973	FAM89B	chr11:65337900-65341669	55.5105
ENSG00000182154	MRPL41	chr9:140445650-140447007	55.4366
ENSG00000177606	JUN	chr1:59246464-59249785	55.3659
ENSG00000173436	MINOS1	chr1:19923472-19984945	55.3415
ENSG00000131401	NAPSB	chr19:50815193-50886239	55.3163
ENSG00000189060	H1F0	chr22:38201113-38203442	55.2781
ENSG00000145901	TNIP1	chr5:150409505-150473138	55.263
ENSG00000204136	GGTA1P	chr9:124137518-124262306	55.2148
ENSG00000160752	FDPS	chr1:155278538-155300905	55.2107
ENSG00000196576	PLXNB2	chr22:50713407-50746056	55.1532
ENSG00000168610	STAT3	chr17:40465341-40540586	55.148
ENSG00000101199	ARFGAP1	chr20:61904136-61921142	55.1375
ENSG00000138760	SCARB2	chr4:77079889-77135046	55.1355
ENSG00000176731	C8orf59	chr8:86089459-86132650	55.089
ENSG00000110717	NDUFS8	chr11:67798083-67804111	55.0627
ENSG00000141552	ANAPC11	chr17:79845712-79869340	55.0466
ENSG00000205937	RNPS1	chr16:2303116-2323419	55.0455
ENSG00000112473	SLC39A7	chr6:33161364-33172216	55.0136
ENSG00000122122	SASH3	chrX:128913954-128930939	55.007
ENSG00000197157	SND1	chr7:127292233-127732661	55.0001
ENSG00000089351	GRAMD1A	chr19:35485687-35517375	54.9802
ENSG00000184076	UQCR10	chr22:30163357-30166402	54.9337
ENSG00000131174	COX7B	chrX:77154934-77162870	54.8987
ENSG00000130706	ADRM1	chr20:60877148-60942368	54.885
ENSG00000224578	HNRNPA1P48	chr16:51679666-51681043	54.8789
ENSG00000066322	ELOVL1	chr1:43829067-43833696	54.8374
ENSG00000105677	TMEM147	chr19:36024313-36038428	54.8258
ENSG00000226360	RPL10AP6	chr3:61547242-62355005	54.7983
ENSG00000116824	CD2	chr1:117297006-117311850	54.7943
ENSG00000077984	CST7	chr20:24929865-24940564	54.6807
ENSG00000170638	TRABD	chr22:50624343-50638976	54.6537
ENSG00000166295	ANAPC16	chr10:73856277-73995618	54.639
ENSG00000011422	PLAUR	chr19:44150246-44174699	54.6149
ENSG00000224373	IGHV4-59	chr14:107081805-107083830	54.6124
ENSG00000143621	ILF2	chr1:153634511-153643524	54.6073
ENSG00000085733	CTTN	chr11:70116805-70282690	54.5696
ENSG00000184990	SIVA1	chr14:105219436-105234831	54.5221
ENSG00000132963	POMP	chr13:29233240-29253062	54.5197
ENSG00000167578	RAB4B	chr19:41277552-41406413	54.3859
ENSG00000162889	MAPKAPK2	chr1:206858288-206907628	54.3718
ENSG00000087191	PSMC5	chr17:61896792-61909379	54.3713
ENSG00000126456	IRF3	chr19:50162825-50177173	54.3576
ENSG00000185359	HGS	chr17:79648203-79670330	54.3251
ENSG00000159199	ATP5G1	chr17:46952221-47006418	54.2962
ENSG00000171222	SCAND1	chr20:34541538-34547394	54.2685
ENSG00000187474	FPR3	chr19:52248424-52329442	54.2227
ENSG00000004779	NDUFAB1	chr16:23592322-23607677	54.2125
ENSG00000019144	PHLDB1	chr11:118477154-118550399	54.1463
ENSG00000000971	CFH	chr1:196621007-196716634	54.0595
ENSG00000130520	LSM4	chr19:18417039-18434084	53.9886
ENSG00000213722	DDAH2	chr6:31694814-31707540	53.8825
ENSG00000143222	UFC1	chr1:161122565-161129139	53.8648
ENSG00000180304	OAZ2	chr15:64979771-65011801	53.8604
ENSG00000062485	CS	chr12:56665482-56727837	53.8499
ENSG00000072818	ACAP1	chr17:7239847-7254797	53.8373
ENSG00000047849	MAP4	chr3:47892181-48130769	53.8331
ENSG00000196498	NCOR2	chr12:124808960-125052135	53.7601
ENSG00000099958	DERL3	chr22:24129149-24181315	53.7437
ENSG00000257073	AC011933.1	chr17:73314156-73401790	53.7144
ENSG00000135387	CAPRIN1	chr11:34073229-34122703	53.7038
ENSG00000198715	C1orf85	chr1:156252725-156265463	53.6823
ENSG00000197982	C1orf122	chr1:38268615-38275126	53.6243
ENSG00000095139	ARCN1	chr11:118307204-118473748	53.5594
ENSG00000234741	GAS5	chr1:173832385-173872687	53.5503
ENSG00000131100	ATP6V1E1	chr22:18074901-18111584	53.5422
ENSG00000125952	MAX	chr14:65381078-65569413	53.5388
ENSG00000006075	CCL3	chr17:34400225-34417515	53.5157
ENSG00000167986	DDB1	chr11:61066922-61136981	53.4549
ENSG00000166797	FAM96A	chr15:64364757-64386217	53.4263
ENSG00000126088	UROD	chr1:45477818-45481247	53.4258
ENSG00000087087	SRRT	chr7:100472732-100486285	53.407
ENSG00000166557	TMED3	chr15:79603403-79704334	53.3192
ENSG00000064607	SUGP2	chr19:19101696-19170563	53.2675
ENSG00000179091	CYC1	chr8:145149929-145152428	53.2575
ENSG00000126458	RRAS	chr19:50138548-50143458	53.1727
ENSG00000090013	BLVRB	chr19:40953695-40971747	53.1698
ENSG00000100138	NHP2L1	chr22:42069933-42094140	53.158
ENSG00000108523	RNF167	chr17:4840424-4848517	53.1352
ENSG00000188313	PLSCR1	chr3:146232966-146262651	53.1127
ENSG00000127481	UBR4	chr1:19398603-19536770	53.0476
ENSG00000180447	GAS1	chr9:89559278-89562104	53.0305
ENSG00000129625	REEP5	chr5:112043194-112258236	52.9963
ENSG00000126005	MMP24-AS1	chr20:33703166-33872788	52.9571
ENSG00000104325	DECR1	chr8:90945563-91064320	52.957
ENSG00000024422	EHD2	chr19:48110780-48246391	52.9525
ENSG00000100385	IL2RB	chr22:37521877-37595425	52.9371
ENSG00000129353	SLC44A2	chr19:10713132-10755235	52.8959
ENSG00000084754	HADHA	chr2:26413503-26513336	52.8928
ENSG00000100225	FBXO7	chr22:32870662-32894818	52.8859
ENSG00000163346	PBXIP1	chr1:154916551-154928599	52.8725
ENSG00000160075	SSU72	chr1:1477052-1510249	52.815
ENSG00000101474	APMAP	chr20:24943560-24973615	52.7821
ENSG00000091317	CMTM6	chr3:32433162-32544900	52.7711
ENSG00000205155	PSENEN	chr19:36230057-36245420	52.7342
ENSG00000197912	SPG7	chr16:89557324-89624176	52.7323
ENSG00000134986	NREP	chr5:110831730-111353006	52.6473
ENSG00000159352	PSMD4	chr1:151227178-151239955	52.6314
ENSG00000130985	UBA1	chrX:47050259-47074527	52.6179
ENSG00000122861	PLAU	chr10:75668934-75682535	52.5592
ENSG00000126214	KLC1	chr14:104019757-104181841	52.5033
ENSG00000134028	ADAMDEC1	chr8:24151552-24769586	52.4501
ENSG00000005844	ITGAL	chr16:30483978-30534506	52.3994
ENSG00000156261	CCT8	chr21:30428125-30446118	52.3808
ENSG00000243927	MRPS6	chr21:35445523-35732332	52.3344
ENSG00000008282	SYPL1	chr7:105730948-105753022	52.2405
ENSG00000168002	POLR2G	chr11:62529015-62534182	52.2155
ENSG00000215301	DDX3X	chrX:41192650-41223725	52.1784
ENSG00000161955	TNFSF13	chr17:7452207-7464925	52.13
ENSG00000177879	AP3S1	chr5:115163892-115249778	52.0976
ENSG00000050405	LIMA1	chr12:50569570-50677329	52.0952
ENSG00000111639	MRPL51	chr12:6601149-6641121	52.0871
ENSG00000129187	DCTD	chr4:183811212-183839089	52.0713
ENSG00000082153	BZW1	chr2:201542955-201688569	52.0697
ENSG00000100100	PIK3IP1	chr22:31677578-31742218	52.0695
ENSG00000155254	MARVELD1	chr10:99472929-99477907	52.0637
ENSG00000115128	SF3B14	chr2:24290453-24299313	52.0478
ENSG00000116260	QSOX1	chr1:180123968-180173165	52.0375
ENSG00000085662	AKR1B1	chr7:134127101-134144036	52.027
ENSG00000161638	ITGA5	chr12:54747444-54891472	51.9807
ENSG00000178035	IMPDH2	chr3:49061757-49067139	51.9776
ENSG00000115306	SPTBN1	chr2:54683421-54896812	51.9559
ENSG00000146731	CCT6A	chr7:56119322-56131682	51.9513
ENSG00000185475	TMEM179B	chr11:62538591-62559493	51.9374
ENSG00000124562	SNRPC	chr6:34725182-34741571	51.936
ENSG00000170776	AKAP13	chr15:85923801-86293512	51.9048
ENSG00000247774	PCED1B-AS1	chr12:47469489-47630443	51.8984
ENSG00000132716	DCAF8	chr1:160185504-160256138	51.8904
ENSG00000136147	PHF11	chr13:50069745-50103123	51.8871
ENSG00000103502	CDIPT	chr16:29869677-29879371	51.8749
ENSG00000173209	AHSA2	chr2:61404552-61697904	51.829
ENSG00000170004	CHD3	chr17:7760002-7816078	51.8265
ENSG00000124172	ATP5E	chr20:57594308-57607437	51.8235
ENSG00000173272	MZT2A	chr2:132222472-132250316	51.7618
ENSG00000269858	EGLN2	chr19:41277552-41406413	51.7308
ENSG00000146457	WTAP	chr6:160090088-160210781	51.7248
ENSG00000134046	MBD2	chr18:51679078-51751158	51.6759
ENSG00000134686	PHC2	chr1:33772366-33896653	51.6519
ENSG00000089737	DDX24	chr14:94517265-94547591	51.6078
ENSG00000104823	ECH1	chr19:39306061-39342987	51.5992
ENSG00000132205	EMILIN2	chr18:2847027-2915991	51.5906
ENSG00000102760	RGCC	chr13:42031694-42045018	51.537
ENSG00000179134	SAMD4B	chr19:39833035-39876350	51.4799
ENSG00000172543	CTSW	chr11:65647279-65656010	51.4642
ENSG00000137207	YIPF3	chr6:43474706-43543812	51.3889
ENSG00000249915	PDCD6	chr5:271735-438406	51.3869
ENSG00000134575	ACP2	chr11:47260852-47290396	51.3866
ENSG00000177706	FAM20C	chr7:182934-300711	51.3756
ENSG00000072110	ACTN1	chr14:69340859-69446157	51.3575
ENSG00000049449	RCN1	chr11:31806339-32127301	51.3164
ENSG00000092531	SNAP23	chr15:42783430-42841000	51.3155
ENSG00000182054	IDH2	chr15:90626276-90645736	51.2472
ENSG00000162434	JAK1	chr1:65210777-65432187	51.2038
ENSG00000174718	KIAA1551	chr12:32112303-32146039	51.1632
ENSG00000127125	PPCS	chr1:42895999-43120335	51.1454
ENSG00000204469	PRRC2A	chr6:31588496-31605548	51.1385
ENSG00000173486	FKBP2	chr11:64008474-64011604	51.1075
ENSG00000129128	SPCS3	chr4:177229418-177253396	51.0588
ENSG00000119801	YPEL5	chr2:30369806-30383399	51.0557
ENSG00000120963	ZNF706	chr8:102190105-102218421	50.9393
ENSG00000169764	UGP2	chr2:64068073-64118696	50.8902
ENSG00000084090	STARD7	chr2:96850596-96908359	50.8662
ENSG00000125844	RRBP1	chr20:17594322-17662940	50.8659
ENSG00000158517	NCF1	chr7:74071993-74306731	50.8571
ENSG00000243649	CFB	chr6:31865561-31919861	50.8568
ENSG00000112977	DAP	chr5:10679341-10770406	50.8563
ENSG00000168938	PPIC	chr5:122179133-122390362	50.829
ENSG00000243317	C7orf73	chr7:135347243-135433594	50.8263
ENSG00000133030	MPRIP	chr17:16945858-17140502	50.7937
ENSG00000103024	NME3	chr16:1756183-1821731	50.7855
ENSG00000138029	HADHB	chr2:26413503-26513336	50.7777
ENSG00000082781	ITGB5	chr3:124480794-124620265	50.7708
ENSG00000164125	FAM198B	chr4:159045625-159176563	50.7617
ENSG00000159322	ADPGK	chr15:73043709-73090540	50.7483
ENSG00000119632	IFI27L2	chr14:94594115-94596590	50.6861
ENSG00000132676	DAP3	chr1:155579566-155829191	50.6845
ENSG00000197965	MPZL1	chr1:167690428-167761156	50.5878
ENSG00000134440	NARS	chr18:55267887-55289445	50.5689
ENSG00000179222	MAGED1	chrX:51546102-51645453	50.4576
ENSG00000169715	MT1E	chr16:56659386-56661024	50.4518
ENSG00000150753	CCT5	chr5:10250032-10267258	50.4137
ENSG00000213983	AP1G2	chr14:23980968-24048009	50.3959
ENSG00000103266	STUB1	chr16:730223-734529	50.369
ENSG00000204291	COL15A1	chr9:101705460-101833069	50.3383
ENSG00000162144	CYB561A3	chr11:61066922-61136981	50.3327
ENSG00000149923	PPP4C	chr16:30087298-30096698	50.3321
ENSG00000113013	HSPA9	chr5:137890570-137911133	50.2917
ENSG00000157191	NECAP2	chr1:16767166-16786573	50.2359
ENSG00000106948	AKNA	chr9:117096435-117156685	50.2331
ENSG00000125826	RBCK1	chr20:388141-411610	50.2284
ENSG00000055070	SZRD1	chr1:16679069-16763919	50.2104
ENSG00000169136	ATF5	chr19:50392910-50464429	50.1782
ENSG00000243147	MRPL33	chr2:27994583-28561768	50.1748
ENSG00000078098	FAP	chr2:163016271-163101661	50.1512
ENSG00000096746	HNRNPH3	chr10:70042416-70167051	50.1359
ENSG00000158985	CDC42SE2	chr5:130581185-130734140	50.1026
ENSG00000110876	SELPLG	chr12:109015685-109035094	50.091
ENSG00000131477	RAMP2	chr17:40905931-40915059	50.0308
ENSG00000160201	U2AF1	chr21:44513065-44527697	50.0189
ENSG00000118503	TNFAIP3	chr6:138144809-138204449	50.0106
ENSG00000099785	MARCH2	chr19:8478153-8503901	49.9982
ENSG00000103202	NME4	chr16:446724-462487	49.9969
ENSG00000185043	CIB1	chr15:90773206-90785315	49.9888
ENSG00000119383	PPP2R4	chr9:131857088-131911225	49.9722
ENSG00000242076	IGKV1-33	chr2:89567757-89568263	49.9646
ENSG00000063245	EPN1	chr19:56186591-56249768	49.9121
ENSG00000154175	ABI3BP	chr3:100467999-100712359	49.9054
ENSG00000225200	AB019441.29	chr14:106444606-106445233	49.8905
ENSG00000065809	FAM107B	chr10:14560555-14816896	49.8801
ENSG00000105700	KXD1	chr19:18668571-18680197	49.8222
ENSG00000160310	PRMT2	chr21:48055078-48085036	49.802
ENSG00000253364	RP11-731F5.2	chr14:106109388-106115394	49.7732
ENSG00000065357	DGKA	chr12:56295196-56347811	49.764
ENSG00000236801	RPL24P8	chr9:72658496-72873782	49.713
ENSG00000162736	NCSTN	chr1:160259062-160328742	49.7009
ENSG00000172660	TAF15	chr17:34136458-34195895	49.6557
ENSG00000064961	HMG20B	chr19:3506270-3579086	49.6407
ENSG00000099194	SCD	chr10:102106880-102124591	49.6299
ENSG00000119705	SLIRP	chr14:78174413-78236085	49.5999
ENSG00000204822	MRPL53	chr2:74699084-74722013	49.5054
ENSG00000160796	NBEAL2	chr3:46963215-47051193	49.5039
ENSG00000147123	NDUFB11	chrX:47001614-47046212	49.5013
ENSG00000123989	CHPF	chr2:220403668-220415317	49.4473
ENSG00000144028	SNRNP200	chr2:96940073-96971297	49.4344
ENSG00000122176	FMOD	chr1:203309755-203320617	49.4162
ENSG00000179262	RAD23A	chr19:13056668-13064456	49.2999
ENSG00000089006	SNX5	chr20:17922240-18039832	49.2989
ENSG00000153563	CD8A	chr2:87011728-87035519	49.2108
ENSG00000115286	NDUFS7	chr19:1383525-1396466	49.1584
ENSG00000126457	PRMT1	chr19:50179042-50193832	49.1491
ENSG00000256309	AC009469.1	chr2:218664511-218867718	49.149
ENSG00000139641	ESYT1	chr12:56511942-56538455	49.1051
ENSG00000116586	LAMTOR2	chr1:156024542-156028301	49.0351
ENSG00000143106	PSMA5	chr1:109941652-109969062	49.0165
ENSG00000110031	LPXN	chr11:58294343-58345693	48.9492
ENSG00000143545	RAB13	chr1:153954126-153958834	48.9407
ENSG00000109920	FNBP4	chr11:47738071-47788995	48.9022
ENSG00000205531	NAP1L4	chr11:2965666-3013607	48.8747
ENSG00000102316	MAGED2	chrX:54834031-54842445	48.8731
ENSG00000150337	FCGR1A	chr1:149754226-149783928	48.8634
ENSG00000179583	CIITA	chr16:10958770-11036878	48.8504
ENSG00000143570	SLC39A1	chr1:153931574-153950164	48.8496
ENSG00000178950	GAK	chr4:843063-926161	48.8324
ENSG00000214655	ZSWIM8	chr10:75545339-75571589	48.8244
ENSG00000110880	CORO1C	chr12:109038884-109125372	48.8219
ENSG00000213598	RP11-112J1.1	chr14:59261371-59261747	48.7354
ENSG00000120913	PDLIM2	chr8:22435791-22461663	48.7048
ENSG00000162032	SPSB3	chr16:1823207-1844972	48.7015
ENSG00000115594	IL1R1	chr2:102681003-102798568	48.59
ENSG00000139679	LPAR6	chr13:48877886-49056122	48.5882
ENSG00000109846	CRYAB	chr11:111779288-111797596	48.5766
ENSG00000171490	RSL1D1	chr16:11929055-11945442	48.5682
ENSG00000078668	VDAC3	chr8:42249141-42263415	48.5398
ENSG00000132965	ALOX5AP	chr13:31309644-31338556	48.5181
ENSG00000112667	DNPH1	chr6:43193366-43197222	48.4652
ENSG00000255717	SNHG1	chr11:62619459-62623386	48.4497
ENSG00000131724	IL13RA1	chrX:117861534-117928502	48.4419
ENSG00000162430	SEPN1	chr1:26126666-26185903	48.429
ENSG00000065427	KARS	chr16:75661621-75795770	48.3683
ENSG00000107281	NPDC1	chr9:139933921-139940655	48.3317
ENSG00000232346	SC22CB-1E7.1	chr22:32435476-32435883	48.3199
ENSG00000162585	C1orf86	chr1:1981908-2152177	48.3161
ENSG00000105221	AKT2	chr19:40736223-40791443	48.316
ENSG00000149499	EML3	chr11:62369689-62382592	48.2642
ENSG00000110079	MS4A4A	chr11:60048013-60076445	48.2556
ENSG00000125944	HNRNPR	chr1:23630263-23670829	48.2348
ENSG00000023734	STRAP	chr12:16035324-16056412	48.2182
ENSG00000170027	YWHAG	chr7:75956115-75988348	48.2134
ENSG00000158773	USF1	chr1:161009040-161015767	48.2119
ENSG00000104093	DMXL2	chr15:51706293-51915030	48.162
ENSG00000216866	RPS2P55	chrX:40794197-40795117	48.1453
ENSG00000178209	PLEC	chr8:144989320-145050902	48.1354
ENSG00000116679	IVNS1ABP	chr1:185265519-185286461	48.1138
ENSG00000157637	SLC38A10	chr17:79218799-79269347	48.1084
ENSG00000172061	LRRC15	chr3:194075975-194090472	48.0916
ENSG00000105058	FAM32A	chr19:16296190-16302857	48.0487
ENSG00000225733	FGD5-AS1	chr3:14860468-15106842	48.039
ENSG00000178127	NDUFV2	chr18:9102627-9285983	48.0198
ENSG00000134910	STT3A	chr11:125439111-125551018	47.9912
ENSG00000124831	LRRFIP1	chr2:238536218-238751451	47.9768
ENSG00000162654	GBP4	chr1:89646830-89664615	47.9705
ENSG00000101336	HCK	chr20:30639990-30689659	47.9603
ENSG00000198053	SIRPA	chr20:1875153-1920543	47.9501
ENSG00000104853	CLPTM1	chr19:45457841-45496599	47.9113
ENSG00000142694	EVA1B	chr1:36771987-36794822	47.8362
ENSG00000139684	ESD	chr13:47345390-47371367	47.753
ENSG00000242372	EIF6	chr20:33703166-33872788	47.7498
ENSG00000108561	C1QBP	chr17:5185557-5372380	47.7407
ENSG00000233954	RP11-169K16.7	chr1:16133678-16134194	47.7167
ENSG00000105518	TMEM205	chr19:11406823-11465620	47.6858
ENSG00000186184	POLR1D	chr13:28194902-28241548	47.6657
ENSG00000129277	CCL4	chr17:34430982-34433014	47.6578
ENSG00000108819	PPP1R9B	chr17:48211103-48227991	47.5747
ENSG00000135596	MICAL1	chr6:109765264-109804440	47.5095
ENSG00000159842	ABR	chr17:900356-1132315	47.4564
ENSG00000129235	TXNDC17	chr17:6481467-6554954	47.2684
ENSG00000103196	CRISPLD2	chr16:84853589-84954374	47.2642
ENSG00000123143	PKN1	chr19:14543864-14582679	47.2489
ENSG00000163956	LRPAP1	chr4:3508102-3534286	47.215
ENSG00000224861	YBX1P1	chr14:66479547-66480507	47.2116
ENSG00000233426	EIF3FP3	chr2:58478574-58479703	47.1842
ENSG00000136250	AOAH	chr7:36552455-36764154	47.182
ENSG00000114125	RNF7	chr3:141457045-141466402	47.103
ENSG00000213639	PPP1CB	chr2:28974505-29093167	47.0985
ENSG00000197006	METTL9	chr16:21608538-21668794	47.0971
ENSG00000134453	RBM17	chr10:6130949-6159420	47.0826
ENSG00000144224	UBXN4	chr2:136499188-136542625	47.0626
ENSG00000141759	TXNL4A	chr18:77732866-77793949	47.0534
ENSG00000108292	MLLT6	chr17:36858704-36886056	47.0434
ENSG00000109606	DHX15	chr4:24519063-24586173	47.0372
ENSG00000168214	RBPJ	chr4:26165076-26436541	47.0371
ENSG00000172932	ANKRD13D	chr11:67056017-67069956	47.0304
ENSG00000108219	TSPAN14	chr10:82213921-82295698	47.0029
ENSG00000166595	FAM96B	chr16:66965958-66968326	46.9939
ENSG00000122642	FKBP9	chr7:32535037-33102409	46.9676
ENSG00000102119	EMD	chrX:153607556-153609883	46.9657
ENSG00000153551	CMTM7	chr3:32433162-32544900	46.9455
ENSG00000023892	DEF6	chr6:35265594-35289548	46.9391
ENSG00000136026	CKAP4	chr12:106631654-106740793	46.9187
ENSG00000182979	MTA1	chr14:105864915-105937066	46.8956
ENSG00000138449	SLC40A1	chr2:190425304-190448484	46.8897
ENSG00000101367	MAPRE1	chr20:31407698-31442063	46.8714
ENSG00000148700	ADD3	chr10:111756125-111895323	46.8624
ENSG00000078618	NRD1	chr1:52027537-52344477	46.7833
ENSG00000182952	HMGN4	chr6:26538632-26546482	46.74
ENSG00000138031	ADCY3	chr2:25012602-25142708	46.7383
ENSG00000227671	MIR3916	chr1:247353152-247405125	46.7294
ENSG00000148672	GLUD1	chr10:88810242-88951225	46.7183
ENSG00000177576	C18orf32	chr18:47008027-47018906	46.7081
ENSG00000100299	ARSA	chr22:51061181-51066607	46.706
ENSG00000156234	CXCL13	chr4:78432906-78532988	46.6957
ENSG00000174851	YIF1A	chr11:66036003-66056641	46.6599
ENSG00000143819	EPHX1	chr1:225997793-226070069	46.6438
ENSG00000146386	ABRACL	chr6:139349818-139364439	46.6383
ENSG00000142102	ATHL1	chr11:289134-296107	46.6114
ENSG00000106588	PSMA2	chr7:42948324-42988557	46.5825
ENSG00000232388	LINC00493	chr20:18548063-18550207	46.5817
ENSG00000085514	PILRA	chr7:99905324-99997719	46.5545
ENSG00000084636	COL16A1	chr1:32083286-32169920	46.5534
ENSG00000213923	CSNK1E	chr22:38686696-38794934	46.5202
ENSG00000144476	ACKR3	chr2:237476429-237491001	46.4913
ENSG00000115085	ZAP70	chr2:98330022-98356325	46.4545
ENSG00000188895	MSL1	chr17:38278550-38293042	46.4533
ENSG00000172889	EGFL7	chr9:139543061-139567130	46.4359
ENSG00000197324	LRP10	chr14:23340821-23350789	46.4309
ENSG00000075223	SEMA3C	chr7:80371853-80551675	46.4294
ENSG00000262246	CORO7	chr16:4364761-4475706	46.3947
ENSG00000213465	ARL2	chr11:64781584-64808044	46.372
ENSG00000206341	HLA-H	chr6:29855070-29858259	46.3047
ENSG00000116350	SRSF4	chr1:29474254-29508499	46.2924
ENSG00000214026	MRPL23	chr11:1968507-2011150	46.2853
ENSG00000145779	TNFAIP8	chr5:118604386-118735383	46.2509
ENSG00000175416	CLTB	chr5:175792470-175843570	46.2447
ENSG00000141556	TBCD	chr17:80709939-81009686	46.2245
ENSG00000167642	SPINT2	chr19:38734674-38795649	46.1949
ENSG00000132530	XAF1	chr17:6658765-6678966	46.1775
ENSG00000118418	HMGN3	chr6:79910961-79946514	46.1478
ENSG00000131507	NDFIP1	chr5:141488069-141534005	46.0941
ENSG00000117691	NENF	chr1:212606228-212619714	46.0856
ENSG00000113657	DPYSL3	chr5:146770373-146889619	46.037
ENSG00000130332	LSM7	chr19:2321515-2355099	46.018
ENSG00000213676	ATF6B	chr6:32006041-32096030	45.9982
ENSG00000135446	CDK4	chr12:58117543-58154190	45.9611
ENSG00000113083	LOX	chr5:121297655-121413980	45.9336
ENSG00000147813	NAPRT1	chr8:144655659-144660819	45.9188
ENSG00000163527	STT3B	chr3:31574129-31679112	45.8489
ENSG00000072310	SREBF1	chr17:17584786-17740325	45.844
ENSG00000061938	TNK2	chr3:195590234-195638816	45.8414
ENSG00000134287	ARF3	chr12:49297200-49351334	45.8399
ENSG00000099917	MED15	chr22:20850199-20946505	45.8036
ENSG00000082996	RNF13	chr3:149478891-149942977	45.7522
ENSG00000181061	HIGD1A	chr3:42734154-42846023	45.7027
ENSG00000172936	MYD88	chr3:38179968-38184513	45.6804
ENSG00000143569	UBAP2L	chr1:154179181-154243986	45.6674
ENSG00000254087	LYN	chr8:56792371-56923940	45.6625
ENSG00000183011	LSMD1	chr17:7760002-7816078	45.6612
ENSG00000151923	TIAL1	chr10:121334198-121356541	45.5867
ENSG00000119013	NDUFB3	chr2:201773695-201950473	45.5593
ENSG00000102054	RBBP7	chrX:16804549-16888537	45.5237
ENSG00000127314	RAP1B	chr12:69004618-69054372	45.512
ENSG00000165795	NDRG2	chr14:21484921-21572881	45.4962
ENSG00000073849	ST6GAL1	chr3:186648273-186796341	45.4956
ENSG00000143727	ACP1	chr2:217729-278283	45.4761
ENSG00000136280	CCM2	chr7:45039073-45116068	45.452
ENSG00000116001	TIA1	chr2:70377011-70475792	45.442
ENSG00000184983	NDUFA6	chr22:42481528-42535938	45.4399
ENSG00000104388	RAB2A	chr8:61429415-61536186	45.4392
ENSG00000188529	SRSF10	chr1:24291293-24307417	45.4251
ENSG00000213809	KLRK1	chr12:10516367-10562745	45.3773
ENSG00000113719	ERGIC1	chr5:172261277-172379688	45.3695
ENSG00000196235	SUPT5H	chr19:39926795-39967310	45.3473
ENSG00000266402	SNORA76	chr17:62223329-62223836	45.3291
ENSG00000138279	ANXA7	chr10:75134858-75173834	45.3222
ENSG00000106263	EIF3B	chr7:2291404-2420380	45.3084
ENSG00000130511	SSBP4	chr19:18529673-18549111	45.2942
ENSG00000163584	RPL22L1	chr3:170582663-170588272	45.2606
ENSG00000171206	TRIM8	chr10:104404252-104418164	45.2129
ENSG00000174437	ATP2A2	chr12:110718560-110788898	45.165
ENSG00000146067	FAM193B	chr5:176946788-176981542	45.1557
ENSG00000082641	NFE2L1	chr17:46125690-46138849	45.1412
ENSG00000213866	YBX1P10	chr9:35971340-35972315	45.1235
ENSG00000117318	ID3	chr1:23884408-23886285	45.1081
ENSG00000173933	RBM4	chr11:66384052-66445392	45.1077
ENSG00000213626	LBH	chr2:30454396-30546596	45.1016
ENSG00000018280	SLC11A1	chr2:219246751-219261617	45.1006
ENSG00000145495	MARCH6	chr5:10353814-10440500	45.0827
ENSG00000188404	SELL	chr1:169631244-169863408	45.0731
ENSG00000140350	ANP32A	chr15:69070873-69355083	45.0242
ENSG00000155876	RRAGA	chr9:19049371-19051019	45.0014
ENSG00000115541	HSPE1	chr2:198351304-198418423	44.9835
ENSG00000164442	CITED2	chr6:139693392-139695757	44.9322
ENSG00000137161	CNPY3	chr6:42896937-42907025	44.9202
ENSG00000004534	RBM6	chr3:49977439-50226508	44.8914
ENSG00000170035	UBE2E3	chr2:181831974-182264286	44.8729
ENSG00000112697	TMEM30A	chr6:75962639-75994684	44.8695
ENSG00000171720	HDAC3	chr5:140894582-141016437	44.8178
ENSG00000172349	IL16	chr15:81451915-81616524	44.7923
ENSG00000204261	TAPSAR1	chr6:32808493-32827362	44.7329
ENSG00000125734	GPR108	chr19:6677714-6737614	44.696
ENSG00000087266	SH3BP2	chr4:2794749-2842825	44.6695
ENSG00000159346	ADIPOR1	chr1:202909950-202927700	44.6528
ENSG00000185339	TCN2	chr22:30972611-31023265	44.6478
ENSG00000086666	ZFAND6	chr15:80351909-80430735	44.6344
ENSG00000132485	ZRANB2	chr1:71514537-71546980	44.6088
ENSG00000148484	RSU1	chr10:16632609-16859527	44.607
ENSG00000109113	RAB34	chr17:27041298-27045447	44.6028
ENSG00000005955	GGNBP2	chr17:34900736-34946278	44.5733
ENSG00000131508	UBE2D2	chr5:138906015-139008018	44.5642
ENSG00000197582	GPX1P1	chrX:13395306-13421138	44.5636
ENSG00000169692	AGPAT2	chr9:139567594-139581875	44.5486
ENSG00000172183	ISG20	chr15:89179383-89199714	44.5412
ENSG00000117632	STMN1	chr1:26210671-26233482	44.5267
ENSG00000178573	MAF	chr16:79619739-79634611	44.506
ENSG00000155660	PDIA4	chr7:148700153-148725733	44.4721
ENSG00000162613	FUBP1	chr1:78409739-78444794	44.4557
ENSG00000131495	NDUFA2	chr5:140018324-140042064	44.4553
ENSG00000203883	SOX18	chr20:62588054-62680994	44.4336
ENSG00000178104	PDE4DIP	chr1:144836156-145076186	44.4222
ENSG00000126581	BECN1	chr17:40950809-40995774	44.4168
ENSG00000099860	GADD45B	chr19:2476119-2478257	44.4132
ENSG00000135862	LAMC1	chr1:182992594-183114727	44.4038
ENSG00000234009	RPL5P34	chr22:43172411-43173302	44.3476
ENSG00000240801	AC132217.4	chr11:2150341-2182571	44.3456
ENSG00000126860	EVI2A	chr17:29335514-29709134	44.2981
ENSG00000178252	WDR6	chr3:48955220-49060928	44.273
ENSG00000130741	EIF2S3	chrX:24072832-24096088	44.2601
ENSG00000198189	HSD17B11	chr4:88224940-88312538	44.2061
ENSG00000167770	OTUB1	chr11:63742078-63933578	44.1952
ENSG00000156471	PTDSS1	chr8:97273942-97349223	44.1299
ENSG00000106554	CHCHD3	chr7:132469628-132766848	44.1279
[truncated: 55,711 more rows]
