# Supplementary material for: A new synthetic toll-like receptor 1/2 ligand is an efficient adjuvant for peptide vaccination in a human volunteer
Source: J Immunother Cancer. 2019 Nov 15;7:307. doi: 10.1186/s40425-019-0796-5 (PMC6858783; doi:10.1186/s40425-019-0796-5)
Supplement: Supplementary file 6 — Additional file 6. Gene expression analysis for gene set HALLMARK_INFLAMMATORY_RESPONSE [file 40425_2019_796_MOESM6_ESM.xlsx]

## Sheet: HALLMARK_INFLAMMATORY_RESPONSE
Gene Set: HALLMARK INFLAMMATORY RESPONSE	Distal Edge (FPKM)	Granuloma Margin (FPKM)	Granuloma Center (FPKM)	Distal Edge	Granuloma Margin	Granuloma Center
CLEC5A	0.0641161	22.183	49.8119	0.0641161	22.183	49.8119
CCL7	0.0642632	3.4567	11.5168	0.0642632	3.4567	11.5168
CXCL6	0	1.04839	1.55916	0	1.04839	1.55916
TACR3	0	0	0	0	0	0
SELS	#N/A	#N/A	#N/A	#N/A	#N/A	#N/A
SLC28A2	0	0	0	0	0	0
OLR1	0.395694	18.7887	50.0604	0.395694	18.7887	50.0604
CCL22	0.580016	27.4998	57.9585	0.580016	27.4998	57.9585
IL1B	0.535644	15.7295	44.0019	0.535644	15.7295	44.0019
ROS1	0	0.369072	0.696335	0	0.369072	0.696335
INHBA	0.331709	6.37979	16.7452	0.331709	6.37979	16.7452
RGS1	2.26778	43.6989	103.049	2.26778	43.6989	103.049
AQP9	0.935379	17.2245	41.6304	0.935379	17.2245	41.6304
IL8	0.800503	7.40186	26.9149	0.800503	7.40186	26.9149
IL1A	0.0157811	0.216983	0.525058	0.0157811	0.216983	0.525058
TNFRSF9	0.113201	1.50191	3.58248	0.113201	1.50191	3.58248
MEP1A	0.00998882	0.153584	0.296956	0.00998882	0.153584	0.296956
CYBB	7.47044	130.898	221.068	7.47044	130.898	221.068
NDP	0.217798	1.84012	6.09793	0.217798	1.84012	6.09793
CXCL10	5.46256	123.071	150.019	5.46256	123.071	150.019
PLAUR	5.01988	54.6149	128.343	5.01988	54.6149	128.343
CXCL9	8.97817	331.023	226.296	8.97817	331.023	226.296
PDPN	2.6749	37.6573	67.3926	2.6749	37.6573	67.3926
OSM	0.398189	2.67747	7.99578	0.398189	2.67747	7.99578
IL12B	0	0.208403	0.196312	0	0.208403	0.196312
LTA	0.237942	3.60958	3.86349	0.237942	3.60958	3.86349
CD48	7.16349	91.3249	110.207	7.16349	91.3249	110.207
SLAMF1	0.72198	7.46661	10.5349	0.72198	7.46661	10.5349
FPR1	1.32649	18.081	19.0021	1.32649	18.081	19.0021
TLR2	2.05841	17.77	28.9892	2.05841	17.77	28.9892
KCNA3	0.575437	5.97139	6.99907	0.575437	5.97139	6.99907
CCR7	1.02662	19.489	12.2624	1.02662	19.489	12.2624
CXCR6	2.03025	19.2668	23.8356	2.03025	19.2668	23.8356
C5AR1	5.42164	28.5043	63.565	5.42164	28.5043	63.565
LAMP3	1.05179	16.6308	12.0341	1.05179	16.6308	12.0341
GP1BA	0.0802927	0.746153	0.900572	0.0802927	0.746153	0.900572
CCL17	0.503234	6.27314	5.3459	0.503234	6.27314	5.3459
LCK	3.29794	34.6377	34.7309	3.29794	34.6377	34.7309
P2RX7	1.94565	10.6782	20.1538	1.94565	10.6782	20.1538
PTAFR	4.7314	27.3802	47.185	4.7314	27.3802	47.185
NOD2	1.01114	6.75065	9.96518	1.01114	6.75065	9.96518
IL2RB	5.23776	52.9371	50.8735	5.23776	52.9371	50.8735
C3AR1	8.55512	41.7496	82.5328	8.55512	41.7496	82.5328
GCH1	2.8266	20.2933	27.1802	2.8266	20.2933	27.1802
CCL5	23.4068	214.702	223.242	23.4068	214.702	223.242
CCL20	0.296004	0.919143	2.76675	0.296004	0.919143	2.76675
IL18	4.76394	29.0489	43.4618	4.76394	29.0489	43.4618
SELE	0.266173	1.82572	2.3809	0.266173	1.82572	2.3809
EMR1	0.135398	0.538985	1.2041	0.135398	0.538985	1.2041
MSR1	14.9004	63.1608	132.419	14.9004	63.1608	132.419
TNFSF15	0.254698	1.28893	2.23047	0.254698	1.28893	2.23047
RASGRP1	0.998663	8.62728	8.56383	0.998663	8.62728	8.56383
CSF3R	6.92225	43.5261	58.4468	6.92225	43.5261	58.4468
SEMA4D	4.88883	38.6315	40.2116	4.88883	38.6315	40.2116
MARCO	24.6849	113.166	195.055	24.6849	113.166	195.055
SELL	3.67688	45.0731	28.7389	3.67688	45.0731	28.7389
LCP2	15.4172	78.2396	120.12	15.4172	78.2396	120.12
MEFV	0.339133	2.11951	2.63912	0.339133	2.11951	2.63912
IL7R	6.91001	57.399	53.2132	6.91001	57.399	53.2132
CXCL11	1.98046	16.2058	15.0893	1.98046	16.2058	15.0893
ICAM4	0.227435	0.829471	1.72833	0.227435	0.829471	1.72833
TIMP1	101.288	873.377	734.607	101.288	873.377	734.607
SPHK1	7.46452	39.6198	53.0154	7.46452	39.6198	53.0154
TNFAIP6	2.96601	16.6188	21.0016	2.96601	16.6188	21.0016
SERPINE1	4.50043	25.8303	30.687	4.50043	25.8303	30.687
PROK2	0.0451905	0.192823	0.302036	0.0451905	0.192823	0.302036
PIK3R5	4.3479	23.1508	28.7276	4.3479	23.1508	28.7276
GNA15	3.1568	13.0065	20.2602	3.1568	13.0065	20.2602
TLR1	3.77334	15.5278	24.1102	3.77334	15.5278	24.1102
ICAM1	14.7229	61.7115	93.476	14.7229	61.7115	93.476
CD14	61.0603	257.976	383.927	61.0603	257.976	383.927
GPR183	5.00893	29.6104	31.0125	5.00893	29.6104	31.0125
GPR132	1.70956	10.1439	10.294	1.70956	10.1439	10.294
CSF3	0.0286346	0.289957	0.170348	0.0286346	0.289957	0.170348
CD69	4.46673	29.5436	26.1088	4.46673	29.5436	26.1088
LYN	11.5274	45.6625	66.1356	11.5274	45.6625	66.1356
IL10	0.969862	4.03757	5.2481	0.969862	4.03757	5.2481
MMP14	57.0341	208.21	296.445	57.0341	208.21	296.445
EREG	0.0433986	0.188934	0.22107	0.0433986	0.188934	0.22107
RGS16	2.25817	9.87455	11.4318	2.25817	9.87455	11.4318
SLC31A1	8.32947	20.3628	42.1338	8.32947	20.3628	42.1338
CCL2	19.429	71.2599	92.3198	19.429	71.2599	92.3198
EBI3	2.64052	10.2873	12.3832	2.64052	10.2873	12.3832
SLC1A2	0.164257	0.398091	0.753661	0.164257	0.398091	0.753661
CDKN1A	22.0534	62.7929	98.9347	22.0534	62.7929	98.9347
IL10RA	23.3049	95.5252	104.181	23.3049	95.5252	104.181
NLRP3	1.37511	5.75747	6.11766	1.37511	5.75747	6.11766
TAPBP	35.7853	130.97	155.079	35.7853	130.97	155.079
PTPRE	6.67975	22.0936	28.0016	6.67975	22.0936	28.0016
IRF1	25.962	86.5058	108.589	25.962	86.5058	108.589
CCRL2	4.11546	9.07427	16.798	4.11546	9.07427	16.798
IL15	3.13029	11.8276	12.2851	3.13029	11.8276	12.2851
CD70	0.399216	2.99786	1.53152	0.399216	2.99786	1.53152
SLC31A2	17.5745	40.2767	67.2952	17.5745	40.2767	67.2952
IL18RAP	2.53471	11.133	9.68568	2.53471	11.133	9.68568
IRF7	10.251	33.0483	37.4814	10.251	33.0483	37.4814
ADORA2B	0.336535	1.5448	1.22142	0.336535	1.5448	1.22142
IL4R	12.6541	37.7162	45.4609	12.6541	37.7162	45.4609
IFNGR2	31.0394	73.8003	111.235	31.0394	73.8003	111.235
P2RX4	7.80977	17.6811	27.6025	7.80977	17.6811	27.6025
CMKLR1	9.95902	24.708	34.8282	9.95902	24.708	34.8282
HBEGF	4.87437	9.53497	16.2992	4.87437	9.53497	16.2992
P2RY2	0.268238	0.626818	0.896825	0.268238	0.626818	0.896825
EMP3	68.9687	209.547	230.196	68.9687	209.547	230.196
RHOG	35.0306	87.4192	115.842	35.0306	87.4192	115.842
RTP4	2.20072	6.632	7.17646	2.20072	6.632	7.17646
CCL24	1.90828	5.63839	5.76513	1.90828	5.63839	5.76513
ICOSLG	2.11209	5.32771	6.27564	2.11209	5.32771	6.27564
TPBG	4.59922	12.4725	13.5595	4.59922	12.4725	13.5595
CD40	13.4182	27.3664	37.7107	13.4182	27.3664	37.7107
IRAK2	1.75446	3.2918	4.86658	1.75446	3.2918	4.86658
ITGB8	0.518307	2.57094	1.38386	0.518307	2.57094	1.38386
TNFSF9	0.689107	2.4819	1.83518	0.689107	2.4819	1.83518
CD82	36.1291	69.4031	91.4788	36.1291	69.4031	91.4788
SLC11A2	15.0651	25.5365	37.5674	15.0651	25.5365	37.5674
PDE4B	6.10658	15.1023	15.1993	6.10658	15.1023	15.1993
RIPK2	6.06247	10.1474	15.0043	6.06247	10.1474	15.0043
NMI	9.83748	21.0109	23.7737	9.83748	21.0109	23.7737
IL6	1.03423	2.97865	2.46609	1.03423	2.97865	2.46609
HAS2	1.82447	3.62309	4.25846	1.82447	3.62309	4.25846
NFKBIA	72.1119	130.999	167.59	72.1119	130.999	167.59
MXD1	3.72374	6.7193	8.65169	3.72374	6.7193	8.65169
KCNJ2	1.1634	1.59597	2.5876	1.1634	1.59597	2.5876
PTGER4	10.4535	14.7103	23.0074	10.4535	14.7103	23.0074
HIF1A	42.4872	85.9957	91.7059	42.4872	85.9957	91.7059
ITGA5	30.0767	51.9807	63.518	30.0767	51.9807	63.518
BEST1	2.60904	2.98641	5.40328	2.60904	2.98641	5.40328
TNFRSF1B	35.1929	60.9851	70.7829	35.1929	60.9851	70.7829
ABI1	20.3715	31.1849	40.2584	20.3715	31.1849	40.2584
PTGER2	4.17454	6.12524	8.23688	4.17454	6.12524	8.23688
PTGIR	2.74471	5.89187	5.33039	2.74471	5.89187	5.33039
PSEN1	17.2776	25.3019	31.845	17.2776	25.3019	31.845
IL15RA	16.7264	23.5664	30.6491	16.7264	23.5664	30.6491
STAB1	111.909	188.222	201.652	111.909	188.222	201.652
LY6E	83.8197	181.244	149.584	83.8197	181.244	149.584
NFKB1	13.4952	21.013	23.9082	13.4952	21.013	23.9082
SGMS2	3.86879	7.00928	6.72849	3.86879	7.00928	6.72849
BTG2	67.7719	81.3121	117.157	67.7719	81.3121	117.157
CHST2	8.86057	14.4727	15.3105	8.86057	14.4727	15.3105
CSF1	28.8054	37.9986	49.7537	28.8054	37.9986	49.7537
SCN1B	15.1069	20.7747	24.6612	15.1069	20.7747	24.6612
ACVR1B	9.22203	10.6806	14.9906	9.22203	10.6806	14.9906
AHR	16.3485	24.3177	25.6636	16.3485	24.3177	25.6636
SLC7A1	3.89826	6.26989	6.10481	3.89826	6.26989	6.10481
BDKRB1	0.214227	0.984311	0.324863	0.214227	0.984311	0.324863
NAMPT	25.5048	27.0305	37.9432	25.5048	27.0305	37.9432
IL18R1	4.19596	7.51106	6.20594	4.19596	7.51106	6.20594
RNF144B	10.8409	12.2945	15.9912	10.8409	12.2945	15.9912
ATP2B1	10.9361	16.3746	15.4044	10.9361	16.3746	15.4044
OSMR	9.25371	10.8995	12.005	9.25371	10.8995	12.005
IFITM1	159.716	216.469	198.408	159.716	216.469	198.408
GNAI3	29.0054	32.0172	35.8532	29.0054	32.0172	35.8532
IL1R1	42.4765	48.59	52.3153	42.4765	48.59	52.3153
RELA	31.3109	36.327	37.8134	31.3109	36.327	37.8134
ATP2C1	29.9096	25.1046	36.1059	29.9096	25.1046	36.1059
RAF1	34.582	38.2188	40.5576	34.582	38.2188	40.5576
AXL	17.6041	17.6999	20.4534	17.6041	17.6999	20.4534
ABCA1	17.2748	13.1515	19.3928	17.2748	13.1515	19.3928
IFNAR1	25.7354	23.0624	28.7307	25.7354	23.0624	28.7307
ATP2A2	48.1797	45.165	53.7496	48.1797	45.165	53.7496
HRH1	2.79806	3.29205	3.0406	2.79806	3.29205	3.0406
BST2	119.681	93.1691	127.666	119.681	93.1691	127.666
LIF	0.829491	1.42878	0.867622	0.829491	1.42878	0.867622
GABBR1	17.3385	21.1136	17.8737	17.3385	21.1136	17.8737
PVR	5.88863	4.11689	6.01176	5.88863	4.11689	6.01176
FFAR2	2.8372	0.759574	2.87781	2.8372	0.759574	2.87781
TNFSF10	61.7824	60.7121	62.0476	61.7824	60.7121	62.0476
ADRM1	57.9881	54.885	57.8175	57.9881	54.885	57.8175
MYC	24.3894	21.4324	23.6971	24.3894	21.4324	23.6971
CD55	22.2256	41.2475	21.4182	22.2256	41.2475	21.4182
KIF1B	7.63269	5.64962	6.9483	7.63269	5.64962	6.9483
LPAR1	23.6168	21.7773	20.3973	23.6168	21.7773	20.3973
SRI	50.9182	37.9865	43.4159	50.9182	37.9865	43.4159
KLF6	85.0223	59.4396	67.79	85.0223	59.4396	67.79
SCARF1	27.1773	18.6076	21.4114	27.1773	18.6076	21.4114
ACVR2A	7.47983	5.20685	5.13896	7.47983	5.20685	5.13896
ITGB3	4.37677	2.84143	2.9315	4.37677	2.84143	2.9315
EDN1	7.3841	5.86137	4.82861	7.3841	5.86137	4.82861
PCDH7	6.00329	3.05158	3.92509	6.00329	3.05158	3.92509
HPN	1.25439	0.859911	0.816524	1.25439	0.859911	0.816524
NPFFR2	0.0957156	0	0.0572954	0.0957156	0	0.0572954
F3	32.4574	17.0672	18.805	32.4574	17.0672	18.805
EIF2AK2	11.3504	6.97311	6.16494	11.3504	6.97311	6.16494
TLR3	6.44414	2.86006	3.22871	6.44414	2.86006	3.22871
DCBLD2	8.34931	4.37859	3.73499	8.34931	4.37859	3.73499
LDLR	13.9553	5.05999	5.13167	13.9553	5.05999	5.13167
APLNR	57.0233	23.7394	18.5564	57.0233	23.7394	18.5564
ADM	78.7646	28.9541	23.805	78.7646	28.9541	23.805
FZD5	5.12917	1.19395	1.5497	5.12917	1.19395	1.5497
VIP	0.721355	0.201735	0.158272	0.721355	0.201735	0.158272
NMUR1	5.2728	0.996687	0.974137	5.2728	0.996687	0.974137
MET	5.92261	1.74565	1.08939	5.92261	1.74565	1.08939
CALCRL	36.5932	7.20791	6.6948	36.5932	7.20791	6.6948
CX3CL1	27.0117	9.53317	4.15819	27.0117	9.53317	4.15819
SLC7A2	15.4514	5.35311	2.12353	15.4514	5.35311	2.12353
TACR1	2.62554	1.4233	0.324597	2.62554	1.4233	0.324597
SLC4A4	6.10622	0.502855	0.373895	6.10622	0.502855	0.373895
GPC3	79.8857	13.6292	4.00011	79.8857	13.6292	4.00011
OPRK1	0.198033	0.0235678	0	0.198033	0.0235678	0
KCNMB2	0.172444	0.121669	0	0.172444	0.121669	0
